# Supplementary material for: The Search for Cryptic L-Rhamnosyltransferases on the Sporothrix schenckii Genome
Source: MDPI journal article supplement (doi:10.3390/jof8050529), 2022-05-20
Supplement: s1 [file s1]

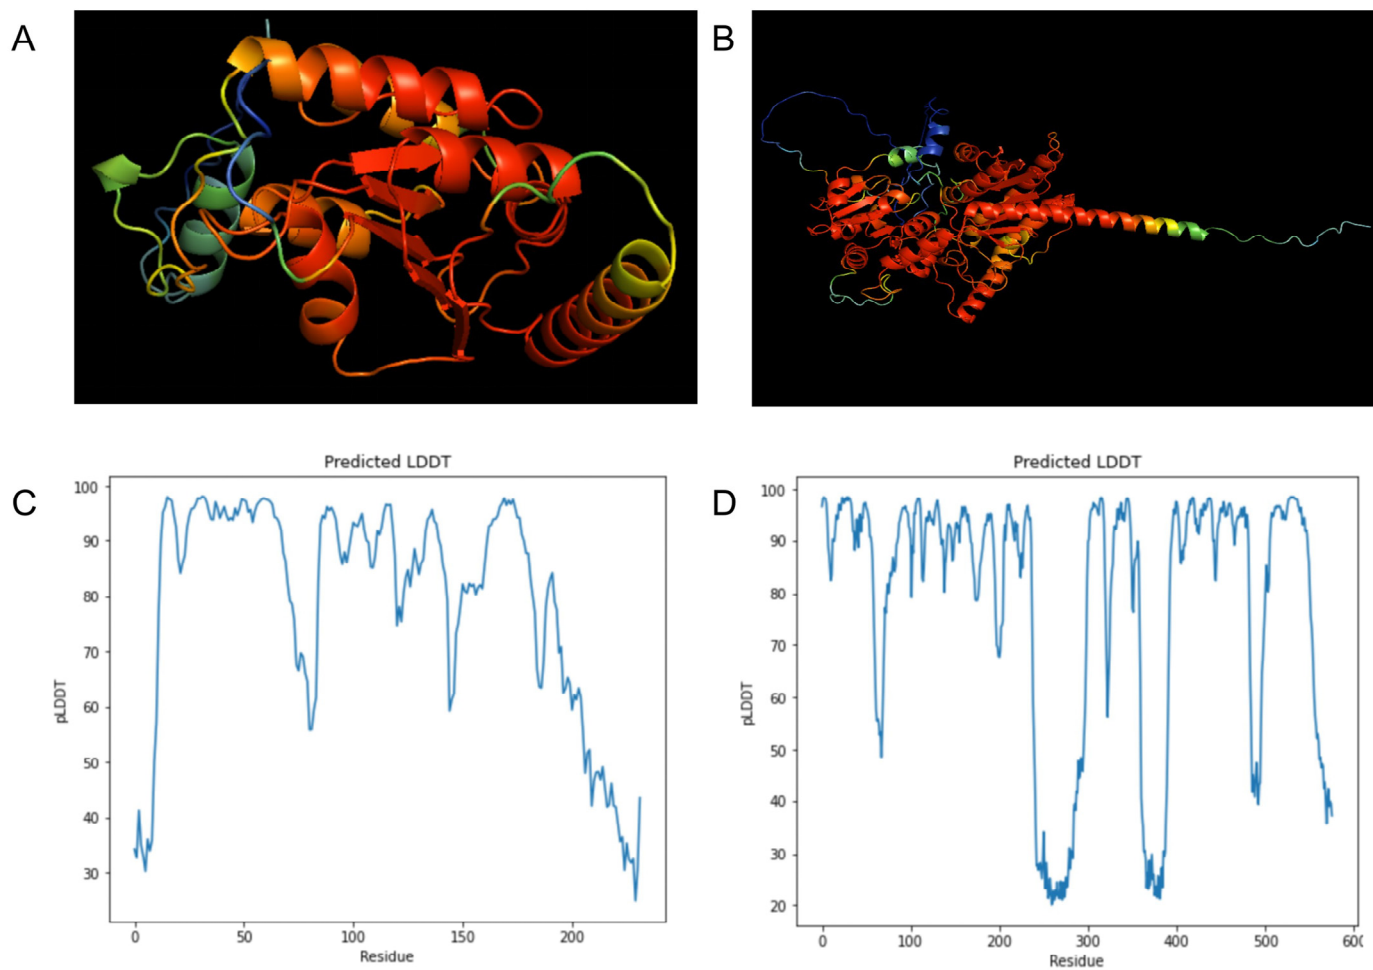

**Figure S1.** Confidence of predicted AlphaFold2 3D models. Confidence values, expressed as pLDDT and color-coded as a traffic-light-like red-yellow-green gradient (with red being high, yellow average, and green low values) for Rht1 (A) and Rht2 (B). Confidence values, expressed as pLDDT and graphed per residue for Rht1 (C) and Rht2 (D).
