# Supplementary material for: The Search for Cryptic L-Rhamnosyltransferases on the Sporothrix schenckii Genome
Source: J Fungi (Basel). 2022 May 20;8(5):529. doi: 10.3390/jof8050529 (PMC9145935; doi:10.3390/jof8050529)
Supplement: Supplementary file 1 [file jof-08-00529-s001.zip › Rhamno_Transf_Euk.hmm]

HMMER3/f [3.3 | Nov 2019]
NAME  vrb_aln
LENG  465
ALPH  amino
RF    no
MM    no
CONS  yes
CS    no
MAP   yes
DATE  Thu Dec 30 17:47:34 2021
NSEQ  16
EFFN  1.347656
CKSUM 3272835661
STATS LOCAL MSV      -11.6742  0.69839
STATS LOCAL VITERBI  -12.5766  0.69839
STATS LOCAL FORWARD   -5.9235  0.69839
HMM          A        C        D        E        F        G        H        I        K        L        M        N        P        Q        R        S        T        V        W        Y   
            m->m     m->i     m->d     i->m     i->i     d->m     d->d
  COMPO   2.55315  4.27303  3.04320  2.60566  3.22301  2.96818  3.59789  2.75649  2.67763  2.40730  3.54920  3.10969  3.20253  3.09106  3.06245  2.64761  2.89602  2.59076  4.34791  3.66637
          2.68618  4.42225  2.77519  2.73123  3.46354  2.40513  3.72494  3.29354  2.67741  2.69355  4.24690  2.90347  2.73739  3.18146  2.89801  2.37887  2.77519  2.98518  4.58477  3.61503
          0.01910  4.36335  5.08570  0.61958  0.77255  0.00000        *
      1   3.44408  4.92745  4.63121  4.29117  3.53771  4.23662  4.91281  2.76920  4.02772  2.07968  0.67292  4.49941  4.72299  4.38798  4.16905  3.83103  3.77157  2.82835  5.42541  4.22178      1 M - - -
          2.68568  4.42242  2.77510  2.73141  3.46371  2.40511  3.72477  3.29325  2.67758  2.69372  4.24707  2.90333  2.73757  3.18164  2.89818  2.37865  2.77537  2.98502  4.58494  3.61521
          0.75574  1.45923  1.21092  1.17277  0.37035  0.48576  0.95510
      2   2.52544  4.45407  3.19075  2.68383  3.75553  3.37565  3.76448  3.11572  2.64883  2.80853  2.73414  2.55992  3.83845  2.99857  3.04212  2.40698  2.24896  2.83396  5.12965  3.85883     12 t - - -
          2.68618  4.42225  2.77519  2.73123  3.46354  2.40513  3.72494  3.29354  2.67741  2.69355  4.24690  2.90347  2.73739  3.18146  2.89801  2.37887  2.77519  2.98518  4.58477  3.61503
          0.02708  4.01841  4.74076  0.61958  0.77255  0.84709  0.55977
      3   2.70341  5.10374  2.62863  1.94169  4.42780  2.94295  3.62763  3.88431  1.97610  3.40384  4.19576  2.57010  3.80665  2.75749  2.84895  2.40246  2.94702  3.49258  5.56855  4.18180     13 e - - -
          2.68618  4.42225  2.77519  2.73123  3.46354  2.40513  3.72494  3.29354  2.67741  2.69355  4.24690  2.90347  2.73739  3.18146  2.89801  2.37887  2.77519  2.98518  4.58477  3.61503
          0.02708  4.01841  4.74076  0.61958  0.77255  0.53076  0.88711
      4   2.67412  5.01504  2.26637  2.36565  2.99051  3.40899  3.65634  3.73961  2.45478  3.29517  4.08702  2.39808  3.83670  2.36881  2.94096  2.45338  2.91219  3.37302  5.48542  4.10406     14 d - - -
          2.68618  4.42225  2.77519  2.73123  3.46354  2.40513  3.72494  3.29354  2.67741  2.69355  4.24690  2.90347  2.73739  3.18146  2.89801  2.37887  2.77519  2.98518  4.58477  3.61503
          0.02220  4.21451  4.93686  0.61958  0.77255  0.51450  0.91081
      5   1.98440  4.62862  3.16825  2.72290  4.34435  2.87076  3.92880  3.77851  2.77278  3.38442  4.18485  2.04963  3.85117  3.09812  3.21168  2.08440  2.22092  3.33570  5.60526  4.29630     15 a - - -
          2.68618  4.42225  2.77519  2.73123  3.46354  2.40513  3.72494  3.29354  2.67741  2.69355  4.24690  2.90347  2.73739  3.18146  2.89801  2.37887  2.77519  2.98518  4.58477  3.61503
          0.02049  4.29368  5.01602  0.61958  0.77255  0.58144  0.81892
      6   2.72875  5.06242  2.94896  1.71741  4.36876  3.47674  3.67208  3.31453  1.83590  3.33662  4.13226  2.97527  3.88549  2.79731  2.79697  2.71994  2.68368  3.41801  5.51970  4.16657     16 e - - -
          2.68618  4.42225  2.77519  2.73123  3.46354  2.40513  3.72494  3.29354  2.67741  2.69355  4.24690  2.90347  2.73739  3.18146  2.89801  2.37887  2.77519  2.98518  4.58477  3.61503
          0.02049  4.29368  5.01602  0.61958  0.77255  0.58144  0.81892
      7   2.67571  5.05543  2.90984  2.02187  4.35316  3.44242  2.81794  3.37205  2.24132  3.33718  4.11315  2.70130  2.57675  2.76311  2.85846  2.66096  2.90711  3.42175  5.51274  4.13719     17 e - - -
          2.68618  4.42225  2.77519  2.73123  3.46354  2.40513  3.72494  3.29354  2.67741  2.69355  4.24690  2.90347  2.73739  3.18146  2.89801  2.37887  2.77519  2.98518  4.58477  3.61503
          0.02049  4.29368  5.01602  0.61958  0.77255  0.43027  1.05078
      8   2.67613  5.07492  2.96517  2.11774  4.38241  3.46117  3.28598  2.95788  2.18006  3.35993  4.12743  2.72887  3.85340  2.35842  2.63465  2.65966  2.50694  3.44558  5.52672  4.14912     18 e - - -
          2.68618  4.42225  2.77519  2.73123  3.46354  2.40513  3.72494  3.29354  2.67741  2.69355  4.24690  2.90347  2.73739  3.18146  2.89801  2.37887  2.77519  2.98518  4.58477  3.61503
          0.01910  4.36335  5.08570  0.61958  0.77255  0.48576  0.95510
      9   2.34701  5.14181  2.43698  2.39098  4.47270  3.45301  3.65341  3.93861  1.93782  3.43985  4.19863  2.93305  2.76499  2.76151  2.41059  2.66970  2.93028  3.52730  5.58767  4.19753     19 k - - -
          2.68618  4.42225  2.77519  2.73123  3.46354  2.40513  3.72494  3.29354  2.67741  2.69355  4.24690  2.90347  2.73739  3.18146  2.89801  2.37887  2.77519  2.98518  4.58477  3.61503
          0.01910  4.36335  5.08570  0.61958  0.77255  0.48576  0.95510
     10   2.69905  5.06068  2.45757  2.42516  4.35903  3.46513  3.67401  3.80320  1.71726  3.34441  3.10216  2.96102  2.83470  2.79537  2.88672  2.68842  2.93216  3.42670  5.52776  4.15630     20 k - - -
          2.68618  4.42225  2.77519  2.73123  3.46354  2.40513  3.72494  3.29354  2.67741  2.69355  4.24690  2.90347  2.73739  3.18146  2.89801  2.37887  2.77519  2.98518  4.58477  3.61503
          0.01910  4.36335  5.08570  0.61958  0.77255  0.48576  0.95510
     11   2.67709  4.33225  3.71303  3.16597  2.85210  3.66102  3.98614  2.80144  3.09968  1.76364  3.44310  3.51114  2.39480  3.38925  3.40740  2.39096  2.92950  2.59990  4.91188  3.65623     21 l - - -
          2.68618  4.42225  2.77519  2.73123  3.46354  2.40513  3.72494  3.29354  2.67741  2.69355  4.24690  2.90347  2.73739  3.18146  2.89801  2.37887  2.77519  2.98518  4.58477  3.61503
          0.01910  4.36335  5.08570  0.61958  0.77255  0.48576  0.95510
     12   2.86280  4.89351  3.11734  2.85326  3.93025  3.48783  1.15551  3.91225  2.83012  3.48507  4.37881  3.28272  4.07259  3.27779  3.16633  2.15028  3.20478  3.53975  5.34211  3.86725     22 h - - -
          2.68618  4.42225  2.77519  2.73123  3.46354  2.40513  3.72494  3.29354  2.67741  2.69355  4.24690  2.90347  2.73739  3.18146  2.89801  2.37887  2.77519  2.98518  4.58477  3.61503
          0.01910  4.36335  5.08570  0.61958  0.77255  0.48576  0.95510
     13   2.57741  4.48968  5.00833  4.50566  3.82930  4.54790  5.17066  1.35033  4.41097  2.42336  3.63837  4.67396  4.88340  4.66503  4.59287  3.93075  3.45071  0.99804  5.70782  4.49697     23 v - - -
          2.68618  4.42225  2.77519  2.73123  3.46354  2.40513  3.72494  3.29354  2.67741  2.69355  4.24690  2.90347  2.73739  3.18146  2.89801  2.37887  2.77519  2.98518  4.58477  3.61503
          0.01910  4.36335  5.08570  0.61958  0.77255  0.48576  0.95510
     14   1.78371  4.29543  4.34577  3.77754  2.76184  3.98103  4.34120  2.32579  3.66456  1.86296  3.30467  3.98890  4.34540  3.88353  3.85062  3.28894  3.08984  1.67774  4.98524  3.78806     24 v - - -
          2.68618  4.42225  2.77519  2.73123  3.46354  2.40513  3.72494  3.29354  2.67741  2.69355  4.24690  2.90347  2.73739  3.18146  2.89801  2.37887  2.77519  2.98518  4.58477  3.61503
          0.01910  4.36335  5.08570  0.61958  0.77255  0.48576  0.95510
     15   3.18640  4.52763  4.92477  4.34278  2.44639  4.41503  4.71827  2.31697  4.19784  1.61838  1.64115  4.49138  4.67185  4.29556  4.27291  3.74316  3.41179  1.69031  5.09597  3.96196     25 l - - -
          2.68618  4.42225  2.77519  2.73123  3.46354  2.40513  3.72494  3.29354  2.67741  2.69355  4.24690  2.90347  2.73739  3.18146  2.89801  2.37887  2.77519  2.98518  4.58477  3.61503
          0.01910  4.36335  5.08570  0.61958  0.77255  0.48576  0.95510
     16   3.51305  4.79030  5.27835  4.71452  1.75140  4.78355  4.94135  1.92578  4.56963  0.99399  3.01084  4.85755  4.93816  4.55877  4.58896  4.13890  3.72706  2.50377  5.12186  3.91271     26 l - - -
          2.68618  4.42225  2.77519  2.73123  3.46354  2.40513  3.72494  3.29354  2.67741  2.69355  4.24690  2.90347  2.73739  3.18146  2.89801  2.37887  2.77519  2.98518  4.58477  3.61503
          0.01910  4.36335  5.08570  0.61958  0.77255  0.48576  0.95510
     17   1.84664  4.47203  3.66314  3.45596  4.59500  3.23196  4.55082  3.94123  3.53261  3.67535  4.56793  3.60929  0.91087  3.84292  3.81482  2.72967  3.04613  3.43355  5.93868  4.74675     27 p - - -
          2.68618  4.42225  2.77519  2.73123  3.46354  2.40513  3.72494  3.29354  2.67741  2.69355  4.24690  2.90347  2.73739  3.18146  2.89801  2.37887  2.77519  2.98518  4.58477  3.61503
          0.01910  4.36335  5.08570  0.61958  0.77255  0.48576  0.95510
     18   4.15446  5.23398  5.15491  4.94975  1.57096  4.80557  3.63157  3.82278  4.74642  3.08890  4.37493  4.41626  5.07916  4.53861  4.64442  4.18428  4.35840  3.74157  1.08781  1.57208     28 w - - -
          2.68618  4.42225  2.77519  2.73123  3.46354  2.40513  3.72494  3.29354  2.67741  2.69355  4.24690  2.90347  2.73739  3.18146  2.89801  2.37887  2.77519  2.98518  4.58477  3.61503
          0.01910  4.36335  5.08570  0.61958  0.77255  0.48576  0.95510
     19   2.38715  4.49202  4.59859  4.04961  2.05904  4.19622  4.47110  2.46437  3.91665  1.12692  3.16084  4.22811  4.52378  4.08004  4.05485  3.52386  3.31435  2.45528  4.93494  3.67239     29 l - - -
          2.68618  4.42225  2.77519  2.73123  3.46354  2.40513  3.72494  3.29354  2.67741  2.69355  4.24690  2.90347  2.73739  3.18146  2.89801  2.37887  2.77519  2.98518  4.58477  3.61503
          0.01910  4.36335  5.08570  0.61958  0.77255  0.48576  0.95510
     20   1.31133  4.42047  3.61032  3.11583  3.84038  3.44257  4.09100  3.12458  3.06053  2.85104  2.71321  3.44353  2.69225  3.38524  3.40342  2.78719  2.92955  2.85271  5.28348  4.05000     30 a - - -
          2.68618  4.42225  2.77519  2.73123  3.46354  2.40513  3.72494  3.29354  2.67741  2.69355  4.24690  2.90347  2.73739  3.18146  2.89801  2.37887  2.77519  2.98518  4.58477  3.61503
          0.01910  4.36335  5.08570  0.61958  0.77255  0.48576  0.95510
     21   2.66915  4.15551  4.08739  3.50292  2.53893  3.76569  2.90832  2.57158  3.38765  2.07620  2.50956  3.72845  4.13287  3.61449  3.58171  3.04994  2.44109  2.05463  4.75562  3.55641     31 v - - -
          2.68618  4.42225  2.77519  2.73123  3.46354  2.40513  3.72494  3.29354  2.67741  2.69355  4.24690  2.90347  2.73739  3.18146  2.89801  2.37887  2.77519  2.98518  4.58477  3.61503
          0.01910  4.36335  5.08570  0.61958  0.77255  0.48576  0.95510
     22   2.48929  4.44127  3.56013  3.44210  4.79262  0.80486  4.62014  4.30596  3.67313  3.97153  4.78543  3.57197  3.94949  3.91556  3.95969  1.95327  3.01753  3.62398  6.10048  4.90166     32 g - - -
          2.68586  4.42227  2.77522  2.73125  3.46356  2.40515  3.72497  3.29356  2.67743  2.69357  4.24692  2.90349  2.73742  3.18148  2.89803  2.37889  2.77522  2.98520  4.58479  3.61505
          0.13340  2.13116  5.08570  0.29599  1.36177  0.48576  0.95510
     23   3.69829  5.37395  3.76562  3.60031  3.76695  3.97583  0.43258  4.48463  3.43754  3.90029  5.00402  3.97867  4.56653  3.98108  3.65906  3.77339  4.03000  4.21017  5.21494  3.70956     34 H - - -
          2.68618  4.42225  2.77519  2.73123  3.46354  2.40513  3.72494  3.29354  2.67741  2.69355  4.24690  2.90347  2.73739  3.18146  2.89801  2.37887  2.77519  2.98518  4.58477  3.61503
          0.01910  4.36335  5.08570  0.61958  0.77255  0.48576  0.95510
     24   2.31600  4.40869  4.61527  4.06136  3.44864  4.20622  4.62493  1.31698  3.92833  2.12348  2.11102  4.25608  4.54984  4.14759  4.09389  3.53783  3.25972  2.04507  5.20453  4.03817     35 i - - -
          2.68618  4.42225  2.77519  2.73123  3.46354  2.40513  3.72494  3.29354  2.67741  2.69355  4.24690  2.90347  2.73739  3.18146  2.89801  2.37887  2.77519  2.98518  4.58477  3.61503
          0.01910  4.36335  5.08570  0.61958  0.77255  0.48576  0.95510
     25   2.22262  4.26735  3.74217  3.18127  3.41363  2.77834  3.97819  2.05331  3.11218  2.49264  3.40242  3.51516  4.05501  3.39187  3.40772  2.93101  2.43444  2.52607  4.89130  2.69525     36 i - - -
          2.68618  4.42225  2.77519  2.73123  3.46354  2.40513  3.72494  3.29354  2.67741  2.69355  4.24690  2.90347  2.73739  3.18146  2.89801  2.37887  2.77519  2.98518  4.58477  3.61503
          0.01910  4.36335  5.08570  0.61958  0.77255  0.48576  0.95510
     26   3.53762  5.18155  4.19993  4.12730  5.03709  3.84295  5.13717  4.74490  4.23383  4.30089  5.38890  4.37312  0.27327  4.60465  4.39775  3.72611  4.02069  4.32673  6.05563  5.17247     37 P - - -
          2.68618  4.42225  2.77519  2.73123  3.46354  2.40513  3.72494  3.29354  2.67741  2.69355  4.24690  2.90347  2.73739  3.18146  2.89801  2.37887  2.77519  2.98518  4.58477  3.61503
          0.01910  4.36335  5.08570  0.61958  0.77255  0.48576  0.95510
     27   2.83038  3.41048  4.31077  3.75036  2.22587  3.90945  2.72802  2.71343  3.61281  1.74406  3.37397  3.87133  4.26879  3.79119  3.75436  3.20632  3.06083  2.53215  4.41652  2.15764     38 l - - -
          2.68618  4.42225  2.77519  2.73123  3.46354  2.40513  3.72494  3.29354  2.67741  2.69355  4.24690  2.90347  2.73739  3.18146  2.89801  2.37887  2.77519  2.98518  4.58477  3.61503
          0.01910  4.36335  5.08570  0.61958  0.77255  0.48576  0.95510
     28   3.43642  4.73899  5.16039  4.59847  2.20421  4.68941  4.90933  2.34434  4.45843  0.87576  3.03809  4.75977  4.87982  4.49318  4.51012  4.04022  3.65757  1.98210  5.14799  3.95975     39 l - - -
          2.68618  4.42225  2.77519  2.73123  3.46354  2.40513  3.72494  3.29354  2.67741  2.69355  4.24690  2.90347  2.73739  3.18146  2.89801  2.37887  2.77519  2.98518  4.58477  3.61503
          0.01910  4.36335  5.08570  0.61958  0.77255  0.48576  0.95510
     29   2.30221  5.19498  2.79786  1.65396  4.50151  3.46096  2.50027  3.96566  2.46857  3.48196  4.26360  2.94229  3.90294  2.47529  2.93494  2.74707  3.01697  3.57171  5.64206  4.25201     40 e - - -
          2.68618  4.42225  2.77519  2.73123  3.46354  2.40513  3.72494  3.29354  2.67741  2.69355  4.24690  2.90347  2.73739  3.18146  2.89801  2.37887  2.77519  2.98518  4.58477  3.61503
          0.01910  4.36335  5.08570  0.61958  0.77255  0.48576  0.95510
     30   3.36394  4.62184  5.24296  4.71111  3.55614  4.78832  5.26387  1.65002  4.59912  1.31146  3.33786  4.89027  5.00524  4.74591  4.71192  4.16598  3.60571  1.19602  5.59090  4.46672     41 v - - -
          2.68618  4.42225  2.77519  2.73123  3.46354  2.40513  3.72494  3.29354  2.67741  2.69355  4.24690  2.90347  2.73739  3.18146  2.89801  2.37887  2.77519  2.98518  4.58477  3.61503
          0.01910  4.36335  5.08570  0.61958  0.77255  0.48576  0.95510
     31   1.03926  4.32800  3.84361  3.48112  4.46960  3.14763  4.46859  3.84233  3.47446  3.56139  4.38729  3.57123  3.89804  3.75205  3.77519  1.88484  2.07178  3.31031  5.82807  4.63476     42 a - - -
          2.68618  4.42225  2.77519  2.73123  3.46354  2.40513  3.72494  3.29354  2.67741  2.69355  4.24690  2.90347  2.73739  3.18146  2.89801  2.37887  2.77519  2.98518  4.58477  3.61503
          0.01910  4.36335  5.08570  0.61958  0.77255  0.48576  0.95510
     32   3.16748  5.39374  3.51895  2.85997  4.87687  3.79807  3.74268  4.22861  1.19906  3.63236  4.47181  2.65635  4.15909  2.86337  1.60366  3.13862  3.33375  3.87728  5.65486  4.46361     43 k - - -
          2.68618  4.42225  2.77519  2.73123  3.46354  2.40513  3.72494  3.29354  2.67741  2.69355  4.24690  2.90347  2.73739  3.18146  2.89801  2.37887  2.77519  2.98518  4.58477  3.61503
          0.01910  4.36335  5.08570  0.61958  0.77255  0.48576  0.95510
     33   2.75355  4.70709  3.35470  2.75977  3.90120  3.61866  3.23640  2.52499  1.94286  2.20483  3.79188  3.21923  3.99451  2.98328  2.34891  2.86013  2.97338  3.01528  5.21568  3.95450     44 k - - -
          2.68618  4.42225  2.77519  2.73123  3.46354  2.40513  3.72494  3.29354  2.67741  2.69355  4.24690  2.90347  2.73739  3.18146  2.89801  2.37887  2.77519  2.98518  4.58477  3.61503
          0.01910  4.36335  5.08570  0.61958  0.77255  0.48576  0.95510
     34   3.56426  4.82918  5.34963  4.78134  2.35041  4.86744  5.08575  1.81036  4.64311  0.81712  2.99048  4.95461  4.99355  4.61788  4.65944  4.22971  3.77661  2.47847  5.23897  4.11364     45 l - - -
          2.68618  4.42225  2.77519  2.73123  3.46354  2.40513  3.72494  3.29354  2.67741  2.69355  4.24690  2.90347  2.73739  3.18146  2.89801  2.37887  2.77519  2.98518  4.58477  3.61503
          0.01910  4.36335  5.08570  0.61958  0.77255  0.48576  0.95510
     35   0.77792  4.32469  3.86776  3.62785  4.60605  3.12120  4.62092  3.97902  3.67013  3.72532  4.55943  3.63709  3.91279  3.93265  3.92519  1.87520  2.92314  3.39233  5.97161  4.78887     46 a - - -
          2.68618  4.42225  2.77519  2.73123  3.46354  2.40513  3.72494  3.29354  2.67741  2.69355  4.24690  2.90347  2.73739  3.18146  2.89801  2.37887  2.77519  2.98518  4.58477  3.61503
          0.01910  4.36335  5.08570  0.61958  0.77255  0.48576  0.95510
     36   2.31100  5.02094  3.04324  2.26203  4.30990  3.50722  3.68010  3.73677  2.37749  2.70506  4.08547  3.01201  3.89936  2.01292  2.31803  2.72598  2.94919  3.38208  5.47918  4.13757     47 q - - -
          2.68618  4.42225  2.77519  2.73123  3.46354  2.40513  3.72494  3.29354  2.67741  2.69355  4.24690  2.90347  2.73739  3.18146  2.89801  2.37887  2.77519  2.98518  4.58477  3.61503
          0.01910  4.36335  5.08570  0.61958  0.77255  0.48576  0.95510
     37   2.31115  5.14575  3.02655  2.52428  4.48351  3.53653  2.82590  3.92205  1.44485  3.43558  4.23189  2.74203  3.94816  2.83391  2.70788  2.80300  3.04270  3.54789  5.57742  4.24310     48 k - - -
          2.68618  4.42225  2.77519  2.73123  3.46354  2.40513  3.72494  3.29354  2.67741  2.69355  4.24690  2.90347  2.73739  3.18146  2.89801  2.37887  2.77519  2.98518  4.58477  3.61503
          0.01910  4.36335  5.08570  0.61958  0.77255  0.48576  0.95510
     38   2.60574  4.67996  3.03357  2.84209  4.68502  1.24912  4.19411  4.16802  3.12946  3.76882  4.57617  2.24251  3.93250  3.39552  3.55496  2.02636  3.04089  3.61409  5.94773  4.63555     49 g - - -
          2.68618  4.42225  2.77519  2.73123  3.46354  2.40513  3.72494  3.29354  2.67741  2.69355  4.24690  2.90347  2.73739  3.18146  2.89801  2.37887  2.77519  2.98518  4.58477  3.61503
          0.01910  4.36335  5.08570  0.61958  0.77255  0.48576  0.95510
     39   2.79187  4.48437  3.65232  3.10835  2.27016  3.74405  2.08319  2.96941  3.03466  2.20998  3.57015  3.47899  2.85321  3.34116  3.36391  3.00619  3.02560  2.76513  4.68496  3.23563     50 h - - -
          2.68618  4.42225  2.77519  2.73123  3.46354  2.40513  3.72494  3.29354  2.67741  2.69355  4.24690  2.90347  2.73739  3.18146  2.89801  2.37887  2.77519  2.98518  4.58477  3.61503
          0.01910  4.36335  5.08570  0.61958  0.77255  0.48576  0.95510
     40   2.67911  4.94617  3.03848  2.47895  3.57598  3.48798  2.67608  3.63973  2.04179  3.21413  4.01330  3.00232  3.87851  2.81255  2.57546  2.31410  2.44077  3.29531  5.42614  4.08080     51 k - - -
          2.68618  4.42225  2.77519  2.73123  3.46354  2.40513  3.72494  3.29354  2.67741  2.69355  4.24690  2.90347  2.73739  3.18146  2.89801  2.37887  2.77519  2.98518  4.58477  3.61503
          0.01910  4.36335  5.08570  0.61958  0.77255  0.48576  0.95510
     41   3.10511  4.45581  4.82539  4.30805  3.76507  4.39853  4.97200  1.59581  4.20266  2.41983  3.60257  4.49536  4.75701  4.46278  4.39710  3.76443  2.44162  0.97950  5.57316  4.36517     52 v - - -
          2.68622  4.42229  2.77524  2.73128  3.46284  2.40517  3.72499  3.29296  2.67745  2.69359  4.24694  2.90351  2.73744  3.18151  2.89805  2.37891  2.77524  2.98523  4.58481  3.61508
          0.13340  2.13116  5.08570  0.66427  0.72289  0.48576  0.95510
     42   2.62304  4.50955  3.40947  2.92217  3.77929  3.46517  3.94956  3.24746  2.89338  2.93737  3.81474  3.31683  3.97078  3.22787  3.26837  1.85261  1.75280  2.95727  5.19591  2.71195     55 t - - -
          2.68618  4.42225  2.77519  2.73123  3.46354  2.40513  3.72494  3.29354  2.67741  2.69355  4.24690  2.90347  2.73739  3.18146  2.89801  2.37887  2.77519  2.98518  4.58477  3.61503
          0.01910  4.36335  5.08570  0.61958  0.77255  0.48576  0.95510
     43   3.42990  4.72713  5.09628  4.57089  1.21765  4.64376  4.64312  1.76996  4.42050  1.66130  3.17545  4.66043  4.86639  4.47264  4.47694  3.99664  3.65535  2.41279  4.86911  3.45281     56 f - - -
          2.68618  4.42225  2.77519  2.73123  3.46354  2.40513  3.72494  3.29354  2.67741  2.69355  4.24690  2.90347  2.73739  3.18146  2.89801  2.37887  2.77519  2.98518  4.58477  3.61503
          0.01910  4.36335  5.08570  0.61958  0.77255  0.48576  0.95510
     44   2.96801  2.78310  4.81941  4.23460  2.45743  4.19464  4.53405  1.43811  4.06817  1.69822  3.19973  4.31129  4.51024  4.20199  4.12769  3.51977  3.20181  2.12463  4.98210  3.80197     57 i - - -
          2.68618  4.42225  2.77519  2.73123  3.46354  2.40513  3.72494  3.29354  2.67741  2.69355  4.24690  2.90347  2.73739  3.18146  2.89801  2.37887  2.77519  2.98518  4.58477  3.61503
          0.09017  4.36335  2.61063  0.61958  0.77255  0.48576  0.95510
     45   2.02043  4.61323  3.11001  2.79349  4.48098  3.22992  4.05294  3.92561  2.93093  3.54253  4.34938  1.92095  3.87280  3.24019  3.35271  1.48320  2.93816  3.43470  5.74713  4.44180     58 s - - -
          2.68618  4.42225  2.77519  2.73123  3.46354  2.40513  3.72494  3.29354  2.67741  2.69355  4.24690  2.90347  2.73739  3.18146  2.89801  2.37887  2.77519  2.98518  4.58477  3.61503
          0.02049  4.29368  5.01602  0.61958  0.77255  0.43027  1.05078
     46   2.57753  4.49101  3.43838  2.93946  3.94551  3.40911  3.99123  3.30309  2.90310  2.53599  3.87038  3.31932  2.80699  3.23925  3.28157  2.30937  1.51218  2.99038  5.32700  4.07051     59 t - - -
          2.68618  4.42225  2.77519  2.73123  3.46354  2.40513  3.72494  3.29354  2.67741  2.69355  4.24690  2.90347  2.73739  3.18146  2.89801  2.37887  2.77519  2.98518  4.58477  3.61503
          0.01910  4.36335  5.08570  0.61958  0.77255  0.48576  0.95510
     47   1.87598  4.76134  3.10153  2.72235  4.32984  3.38737  3.94108  3.74237  2.74366  3.35848  4.19508  3.17263  1.69244  2.42472  3.14611  2.75017  3.00195  3.35806  5.59869  4.29327     60 p - - -
          2.68618  4.42225  2.77519  2.73123  3.46354  2.40513  3.72494  3.29354  2.67741  2.69355  4.24690  2.90347  2.73739  3.18146  2.89801  2.37887  2.77519  2.98518  4.58477  3.61503
          0.01910  4.36335  5.08570  0.61958  0.77255  0.48576  0.95510
     48   2.83892  5.21836  3.11585  2.54131  4.58710  3.57060  2.82448  4.01894  1.83042  3.49068  4.27401  2.44322  3.95514  2.78873  1.85038  2.57229  3.05066  3.62782  5.59729  4.27432     61 k - - -
          2.68618  4.42225  2.77519  2.73123  3.46354  2.40513  3.72494  3.29354  2.67741  2.69355  4.24690  2.90347  2.73739  3.18146  2.89801  2.37887  2.77519  2.98518  4.58477  3.61503
          0.01910  4.36335  5.08570  0.61958  0.77255  0.48576  0.95510
     49   2.72984  4.95847  2.98784  2.52253  4.27486  3.48012  3.74750  3.19860  2.24157  3.28410  4.09716  1.65417  3.91774  2.89456  2.92838  2.28405  2.97826  3.34932  5.49504  4.15513     62 n - - -
          2.68618  4.42225  2.77519  2.73123  3.46354  2.40513  3.72494  3.29354  2.67741  2.69355  4.24690  2.90347  2.73739  3.18146  2.89801  2.37887  2.77519  2.98518  4.58477  3.61503
          0.01910  4.36335  5.08570  0.61958  0.77255  0.48576  0.95510
     50   2.07508  4.32909  3.80448  3.25654  3.48298  3.74521  4.07555  1.79781  3.17891  2.08819  3.44831  2.70678  4.14062  3.47455  3.47604  3.02833  2.96781  2.38463  4.99704  3.77718     63 i - - -
          2.68618  4.42225  2.77519  2.73123  3.46354  2.40513  3.72494  3.29354  2.67741  2.69355  4.24690  2.90347  2.73739  3.18146  2.89801  2.37887  2.77519  2.98518  4.58477  3.61503
          0.01910  4.36335  5.08570  0.61958  0.77255  0.48576  0.95510
     51   2.29990  5.04925  2.54962  2.41063  4.34477  3.45236  3.67413  3.79371  2.44595  2.75106  4.11760  2.71952  3.86273  2.04892  2.92778  2.40401  2.92165  3.41574  5.52542  4.14847     64 q - - -
          2.68618  4.42225  2.77519  2.73123  3.46354  2.40513  3.72494  3.29354  2.67741  2.69355  4.24690  2.90347  2.73739  3.18146  2.89801  2.37887  2.77519  2.98518  4.58477  3.61503
          0.01910  4.36335  5.08570  0.61958  0.77255  0.48576  0.95510
     52   2.77427  5.00040  3.15907  2.57752  4.28472  3.56104  3.26449  3.69875  2.12017  2.65381  4.07210  3.07936  3.94440  2.83747  1.99354  2.00455  2.99314  3.36428  5.44725  4.13733     65 r - - -
          2.68618  4.42225  2.77519  2.73123  3.46354  2.40513  3.72494  3.29354  2.67741  2.69355  4.24690  2.90347  2.73739  3.18146  2.89801  2.37887  2.77519  2.98518  4.58477  3.61503
          0.01910  4.36335  5.08570  0.61958  0.77255  0.48576  0.95510
     53   3.01942  4.43778  4.52345  3.94506  1.99789  4.15767  4.39484  2.13883  3.80481  1.27516  3.11007  4.14650  4.46154  3.00907  3.94963  3.46196  3.24473  2.49559  4.89670  3.67808     66 l - - -
          2.68618  4.42225  2.77519  2.73123  3.46354  2.40513  3.72494  3.29354  2.67741  2.69355  4.24690  2.90347  2.73739  3.18146  2.89801  2.37887  2.77519  2.98518  4.58477  3.61503
          0.21343  4.36335  1.71785  0.61958  0.77255  0.48576  0.95510
     54   2.66529  4.82812  2.85313  2.53636  4.36171  2.36352  3.82889  3.80956  2.62646  3.39153  4.21651  3.02293  1.89833  2.30428  3.04476  2.70947  2.98077  3.41158  5.58784  4.25810     67 p - - -
          2.68618  4.42225  2.77519  2.73123  3.46354  2.40513  3.72494  3.29354  2.67741  2.69355  4.24690  2.90347  2.73739  3.18146  2.89801  2.37887  2.77519  2.98518  4.58477  3.61503
          0.02315  4.17308  4.89543  0.61958  0.77255  0.71567  0.67112
     55   2.78817  5.11241  3.04884  2.50496  4.48459  3.50659  3.63674  3.90622  1.70342  3.39910  4.19673  2.54294  3.90547  2.75738  2.08636  2.29175  3.00546  3.52999  5.52147  4.21074     68 k - - -
          2.68622  4.42229  2.77524  2.73127  3.46358  2.40517  3.72499  3.29358  2.67745  2.69359  4.24694  2.90308  2.73744  3.18151  2.89805  2.37869  2.77524  2.98523  4.58481  3.61507
          0.31145  1.34654  4.89543  0.20134  1.70175  0.36491  1.18501
     56   2.61703  4.23831  4.64072  4.05735  2.52854  4.08145  4.43966  1.82699  3.90643  1.84617  3.27648  4.16803  4.41949  4.08091  4.00519  3.39770  2.79249  1.54283  4.97209  3.79532     70 v - - -
          2.68618  4.42225  2.77519  2.73123  3.46354  2.40513  3.72494  3.29354  2.67741  2.69355  4.24690  2.90347  2.73739  3.18146  2.89801  2.37887  2.77519  2.98518  4.58477  3.61503
          0.01910  4.36335  5.08570  0.61958  0.77255  0.48576  0.95510
     57   2.84487  5.33686  2.18375  1.77294  4.66851  3.41923  3.77177  4.15609  2.61692  3.65438  4.43434  2.89514  2.40468  2.89928  3.14196  2.00574  3.09995  3.73112  5.80956  4.37393     71 e - - -
          2.68618  4.42225  2.77519  2.73123  3.46354  2.40513  3.72494  3.29354  2.67741  2.69355  4.24690  2.90347  2.73739  3.18146  2.89801  2.37887  2.77519  2.98518  4.58477  3.61503
          0.01910  4.36335  5.08570  0.61958  0.77255  0.48576  0.95510
     58   2.76290  5.18772  3.02210  2.29354  4.53978  3.51280  3.03869  3.99027  1.81452  3.47038  4.23736  2.98909  3.90245  2.55501  2.31790  2.09490  2.98347  3.58463  5.59232  4.23488     72 k - - -
          2.68618  4.42225  2.77519  2.73123  3.46354  2.40513  3.72494  3.29354  2.67741  2.69355  4.24690  2.90347  2.73739  3.18146  2.89801  2.37887  2.77519  2.98518  4.58477  3.61503
          0.01910  4.36335  5.08570  0.61958  0.77255  0.48576  0.95510
     59   2.82762  5.29599  1.71976  2.34321  4.60650  3.42788  2.99269  4.09308  2.58972  3.60078  4.38287  2.17438  3.91425  2.88594  3.10443  2.77690  2.31704  3.68014  5.75847  4.33255     73 d - - -
          2.68625  4.42232  2.77526  2.73130  3.46361  2.40520  3.72501  3.29361  2.67748  2.69310  4.24697  2.90327  2.73746  3.18153  2.89771  2.37894  2.77526  2.98525  4.58484  3.61510
          0.19817  1.75111  5.08570  0.67118  0.71561  0.48576  0.95510
     60   3.19754  4.62325  4.42459  3.92587  1.50074  4.18900  2.55432  2.94522  3.77179  1.49507  3.54956  4.03017  4.52360  3.94964  3.92955  3.50201  3.42466  2.85694  4.24769  2.64234     76 l - - -
          2.68618  4.42225  2.77519  2.73123  3.46354  2.40513  3.72494  3.29354  2.67741  2.69355  4.24690  2.90347  2.73739  3.18146  2.89801  2.37887  2.77519  2.98518  4.58477  3.61503
          0.01910  4.36335  5.08570  0.61958  0.77255  0.48576  0.95510
     61   2.64315  4.80856  3.06867  2.62312  4.33807  3.38750  3.84954  3.76965  2.64507  3.35976  4.16615  3.09973  2.38344  2.49982  3.08172  1.61241  2.62935  3.37309  5.57491  4.24729     77 s - - -
          2.68620  4.42227  2.77521  2.73125  3.46356  2.40492  3.72496  3.29356  2.67743  2.69357  4.24692  2.90349  2.73741  3.18148  2.89803  2.37889  2.77521  2.98520  4.58479  3.61505
          0.20267  2.24170  2.56164  0.31514  1.30817  0.48576  0.95510
     62   2.76259  5.24083  2.35096  1.97410  4.55926  3.40297  3.69877  4.03892  2.50715  3.54024  4.31156  2.87539  2.67583  2.56866  3.01680  1.94412  3.00737  3.62179  5.69550  4.27513     79 s - - -
          2.68618  4.42225  2.77519  2.73123  3.46354  2.40513  3.72494  3.29354  2.67741  2.69355  4.24690  2.90347  2.73739  3.18146  2.89801  2.37887  2.77519  2.98518  4.58477  3.61503
          0.02058  4.28971  5.01206  0.61958  0.77255  0.58643  0.81262
     63   2.66180  4.54685  3.30448  2.78713  2.61627  3.54114  3.81276  3.12563  2.76952  2.54984  3.69154  2.18197  3.96309  3.09786  3.16609  2.07709  2.91432  2.86993  5.02051  3.66851     80 s - - -
          2.68618  4.42225  2.77519  2.73123  3.46354  2.40513  3.72494  3.29354  2.67741  2.69355  4.24690  2.90347  2.73739  3.18146  2.89801  2.37887  2.77519  2.98518  4.58477  3.61503
          0.02058  4.28971  5.01206  0.61958  0.77255  0.42759  1.05577
     64   3.36156  4.62707  5.23006  4.76644  3.78775  4.79017  5.46764  0.77921  4.65328  2.22444  3.56660  4.94481  5.07933  4.90496  4.82035  4.21624  3.63320  1.51676  5.85578  4.65350     81 i - - -
          2.68618  4.42225  2.77519  2.73123  3.46354  2.40513  3.72494  3.29354  2.67741  2.69355  4.24690  2.90347  2.73739  3.18146  2.89801  2.37887  2.77519  2.98518  4.58477  3.61503
          0.01910  4.36335  5.08570  0.61958  0.77255  0.48576  0.95510
     65   2.69040  5.05713  2.98116  2.43200  4.35804  3.47312  3.24349  3.80429  2.00035  3.33810  4.11492  2.44462  3.86716  2.35851  2.83928  2.67973  2.37219  2.94672  5.51293  4.14577     82 k - - -
          2.68618  4.42225  2.77519  2.73123  3.46354  2.40513  3.72494  3.29354  2.67741  2.69355  4.24690  2.90347  2.73739  3.18146  2.89801  2.37887  2.77519  2.98518  4.58477  3.61503
          0.01910  4.36335  5.08570  0.61958  0.77255  0.48576  0.95510
     66   3.30956  4.62417  5.06423  4.50069  2.17617  4.56380  4.82489  2.27864  4.35845  1.12934  3.10365  4.64227  4.79581  4.43315  4.42308  3.90773  3.53665  1.58759  5.12911  3.92980     83 l - - -
          2.68618  4.42225  2.77519  2.73123  3.46354  2.40513  3.72494  3.29354  2.67741  2.69355  4.24690  2.90347  2.73739  3.18146  2.89801  2.37887  2.77519  2.98518  4.58477  3.61503
          0.01910  4.36335  5.08570  0.61958  0.77255  0.48576  0.95510
     67   2.69964  4.37864  3.64424  3.06787  3.49568  3.68488  2.53725  2.18348  2.91114  2.55884  3.47814  3.44745  4.06267  3.27740  2.63051  2.94600  2.93048  1.95368  4.95530  3.72073     84 v - - -
          2.68618  4.42225  2.77519  2.73123  3.46354  2.40513  3.72494  3.29354  2.67741  2.69355  4.24690  2.90347  2.73739  3.18146  2.89801  2.37887  2.77519  2.98518  4.58477  3.61503
          0.01910  4.36335  5.08570  0.61958  0.77255  0.48576  0.95510
     68   2.67541  5.16482  2.45328  2.07436  4.49966  3.43628  3.63466  3.97928  2.14655  3.46511  4.20973  2.90664  3.19946  2.54515  2.68844  2.38964  2.50907  3.55026  5.60225  4.19577     85 e - - -
          2.68618  4.42225  2.77519  2.73123  3.46354  2.40513  3.72494  3.29354  2.67741  2.69355  4.24690  2.90347  2.73739  3.18146  2.89801  2.37887  2.77519  2.98518  4.58477  3.61503
          0.01910  4.36335  5.08570  0.61958  0.77255  0.48576  0.95510
     69   3.44063  4.69868  5.29230  4.74876  3.43197  4.83899  5.26406  1.58351  4.62816  1.00424  3.20396  4.94013  5.02023  4.72053  4.71350  4.21516  3.67445  1.65935  5.52123  4.44326     86 l - - -
          2.68618  4.42225  2.77519  2.73123  3.46354  2.40513  3.72494  3.29354  2.67741  2.69355  4.24690  2.90347  2.73739  3.18146  2.89801  2.37887  2.77519  2.98518  4.58477  3.61503
          0.01910  4.36335  5.08570  0.61958  0.77255  0.48576  0.95510
     70   2.67028  4.88521  3.02297  2.56206  4.34572  3.41631  3.79569  3.77971  2.56950  3.35563  4.15677  3.05876  2.17319  2.03206  3.01041  2.22756  2.54913  3.39211  5.56092  4.22165     87 q - - -
          2.68618  4.42225  2.77519  2.73123  3.46354  2.40513  3.72494  3.29354  2.67741  2.69355  4.24690  2.90347  2.73739  3.18146  2.89801  2.37887  2.77519  2.98518  4.58477  3.61503
          0.01910  4.36335  5.08570  0.61958  0.77255  0.48576  0.95510
     71   2.83050  4.39588  2.78884  3.38544  2.61366  3.87930  4.14255  2.58432  3.32584  1.38956  3.31415  3.72038  4.23800  3.58265  3.60727  3.15761  3.06399  2.19196  4.93741  3.69321     88 l - - -
          2.68619  4.42226  2.77520  2.73124  3.46355  2.40514  3.72495  3.29355  2.67742  2.69356  4.24691  2.90347  2.73740  3.18147  2.89802  2.37877  2.77520  2.98519  4.58478  3.61504
          0.18577  2.85789  2.18793  0.42329  1.06389  0.48576  0.95510
     72   2.49300  4.44915  3.37813  3.18581  4.49318  3.15829  4.35352  3.98285  3.30065  3.65244  4.51053  3.42205  1.01325  3.62592  3.61200  2.07422  2.97578  3.44431  5.81857  4.56876     90 p - - -
          2.68618  4.42225  2.77519  2.73123  3.46354  2.40513  3.72494  3.29354  2.67741  2.69355  4.24690  2.90347  2.73739  3.18146  2.89801  2.37887  2.77519  2.98518  4.58477  3.61503
          0.02139  4.25134  4.97369  0.61958  0.77255  0.63253  0.75768
     73   2.68600  5.08270  2.84645  2.37251  4.39641  3.42158  2.86351  3.85719  2.39776  3.38034  4.15522  2.39821  3.12195  2.17993  2.86649  2.29218  2.92223  3.46441  5.54534  4.16219     91 q - - -
          2.68622  4.42229  2.77523  2.73127  3.46358  2.40516  3.72498  3.29358  2.67745  2.69359  4.24693  2.90350  2.73743  3.18150  2.89804  2.37891  2.77460  2.98522  4.58481  3.61507
          0.25135  1.53557  4.97369  0.21760  1.63192  0.63253  0.75768
     74   2.75868  4.25446  4.06100  2.68670  2.53226  3.86746  4.17268  2.03869  3.40565  2.27214  3.30822  3.77823  4.22623  3.65852  3.64565  3.15454  2.99402  1.58792  4.92153  3.70901     93 v - - -
          2.68618  4.42225  2.77519  2.73123  3.46354  2.40513  3.72494  3.29354  2.67741  2.69355  4.24690  2.90347  2.73739  3.18146  2.89801  2.37887  2.77519  2.98518  4.58477  3.61503
          0.02139  4.25134  4.97369  0.61958  0.77255  0.63253  0.75768
     75   2.90618  5.47100  1.91958  1.53718  4.77874  3.36255  3.77907  4.28687  2.68210  3.76636  4.56055  2.37576  2.60511  2.91584  3.23718  2.81849  3.16874  3.84912  5.91420  4.44178     94 e - - -
          2.68622  4.42229  2.77523  2.73127  3.46358  2.40517  3.72498  3.29358  2.67745  2.69359  4.24694  2.90333  2.73743  3.18150  2.89805  2.37891  2.77508  2.98482  4.58481  3.61507
          0.19327  1.77892  4.97369  0.40866  1.09225  0.40384  1.10187
     76   2.85639  5.29329  2.64693  1.97255  4.60059  1.94589  2.44003  4.08024  2.59439  3.59546  4.38906  2.40827  3.93430  2.91007  3.08779  2.80871  3.10729  3.67920  5.75684  4.34306     97 g - - -
          2.68618  4.42225  2.77519  2.73123  3.46354  2.40513  3.72494  3.29354  2.67741  2.69355  4.24690  2.90347  2.73739  3.18146  2.89801  2.37887  2.77519  2.98518  4.58477  3.61503
          0.01910  4.36335  5.08570  0.61958  0.77255  0.48576  0.95510
     77   3.47609  4.80189  5.11896  4.61164  3.33374  4.71303  5.15081  2.23388  4.43450  0.74391  3.13883  4.82513  4.95494  4.57893  4.54164  4.11350  3.72724  1.81392  5.43515  4.32972     98 l - - -
          2.68618  4.42225  2.77519  2.73123  3.46354  2.40513  3.72494  3.29354  2.67741  2.69355  4.24690  2.90347  2.73739  3.18146  2.89801  2.37887  2.77519  2.98518  4.58477  3.61503
          0.01910  4.36335  5.08570  0.61958  0.77255  0.48576  0.95510
     78   3.53762  5.18155  4.19993  4.12730  5.03709  3.84295  5.13717  4.74490  4.23383  4.30089  5.38890  4.37312  0.27327  4.60465  4.39775  3.72611  4.02069  4.32673  6.05563  5.17247     99 P - - -
          2.68618  4.42225  2.77519  2.73123  3.46354  2.40513  3.72494  3.29354  2.67741  2.69355  4.24690  2.90347  2.73739  3.18146  2.89801  2.37887  2.77519  2.98518  4.58477  3.61503
          0.01910  4.36335  5.08570  0.61958  0.77255  0.48576  0.95510
     79   2.41863  4.99364  2.94159  1.77452  4.28735  3.46054  3.69675  3.71929  2.47510  3.28825  4.08206  2.97787  3.87687  2.45884  2.94613  2.28465  2.92936  2.74565  5.49515  4.13353    100 e - - -
          2.68618  4.42225  2.77519  2.73123  3.46354  2.40513  3.72494  3.29354  2.67741  2.69355  4.24690  2.90347  2.73739  3.18146  2.89801  2.37887  2.77519  2.98518  4.58477  3.61503
          0.01910  4.36335  5.08570  0.61958  0.77255  0.48576  0.95510
     80   2.86767  5.17830  2.69268  2.46823  4.64238  1.59851  3.88258  4.12510  2.70089  3.65972  4.47498  2.04077  3.97244  2.28865  3.15604  2.85224  3.16230  3.70698  5.81851  4.43048    101 g - - -
          2.68618  4.42225  2.77519  2.73123  3.46354  2.40513  3.72494  3.29354  2.67741  2.69355  4.24690  2.90347  2.73739  3.18146  2.89801  2.37887  2.77519  2.98518  4.58477  3.61503
          0.01910  4.36335  5.08570  0.61958  0.77255  0.48576  0.95510
     81   1.77675  4.44737  3.48353  2.93898  3.69946  3.55827  3.93444  2.44768  2.90170  2.74323  3.63862  2.59504  3.99823  3.21942  3.27680  2.83194  2.37498  2.50773  5.12866  3.88162    102 a - - -
          2.68618  4.42225  2.77519  2.73123  3.46354  2.40513  3.72494  3.29354  2.67741  2.69355  4.24690  2.90347  2.73739  3.18146  2.89801  2.37887  2.77519  2.98518  4.58477  3.61503
          0.01910  4.36335  5.08570  0.61958  0.77255  0.48576  0.95510
     82   2.74406  5.15497  2.58560  1.54727  4.45092  3.45057  3.69809  3.90887  2.47592  3.43522  2.98625  2.93203  3.88388  2.34047  2.96141  2.71630  2.98114  3.51972  5.61078  4.21824    103 e - - -
          2.68618  4.42225  2.77519  2.73123  3.46354  2.40513  3.72494  3.29354  2.67741  2.69355  4.24690  2.90347  2.73739  3.18146  2.89801  2.37887  2.77519  2.98518  4.58477  3.61503
          0.01910  4.36335  5.08570  0.61958  0.77255  0.48576  0.95510
     83   2.14998  4.60205  3.26625  2.73958  3.94053  3.45862  3.85121  3.32173  2.72615  2.41989  3.83954  2.58666  3.92249  3.06202  3.14523  2.20619  2.12465  3.01873  5.29033  4.00831    104 t - - -
          2.68618  4.42225  2.77519  2.73123  3.46354  2.40513  3.72494  3.29354  2.67741  2.69355  4.24690  2.90347  2.73739  3.18146  2.89801  2.37887  2.77519  2.98518  4.58477  3.61503
          0.01910  4.36335  5.08570  0.61958  0.77255  0.48576  0.95510
     84   2.58471  4.38116  3.65989  3.19610  2.66859  2.48195  4.11622  3.13089  3.16795  2.86416  3.77606  3.48968  4.00323  3.46552  3.49285  2.79871  1.36253  2.85114  5.19453  3.92207    105 t - - -
          2.68618  4.42225  2.77519  2.73123  3.46354  2.40513  3.72494  3.29354  2.67741  2.69355  4.24690  2.90347  2.73739  3.18146  2.89801  2.37887  2.77519  2.98518  4.58477  3.61503
          0.01910  4.36335  5.08570  0.61958  0.77255  0.48576  0.95510
     85   2.65906  4.64815  3.21549  2.65681  3.84062  3.54015  3.76353  2.68705  2.25096  2.88642  2.78321  2.58745  3.92902  2.97094  3.04880  2.33313  2.56501  2.95111  5.19281  3.90610    106 k - - -
          2.68618  4.42225  2.77519  2.73123  3.46354  2.40513  3.72494  3.29354  2.67741  2.69355  4.24690  2.90347  2.73739  3.18146  2.89801  2.37887  2.77519  2.98518  4.58477  3.61503
          0.01910  4.36335  5.08570  0.61958  0.77255  0.48576  0.95510
     86   2.33964  5.37186  1.66326  2.16623  4.69393  3.41874  3.77828  4.18467  2.63317  3.67934  4.46062  2.28902  2.74501  2.90670  3.16452  2.79958  3.11804  3.75820  5.83343  4.39098    107 d - - -
          2.68618  4.42225  2.77519  2.73123  3.46354  2.40513  3.72494  3.29354  2.67741  2.69355  4.24690  2.90347  2.73739  3.18146  2.89801  2.37887  2.77519  2.98518  4.58477  3.61503
          0.01910  4.36335  5.08570  0.61958  0.77255  0.48576  0.95510
     87   2.88858  4.29571  4.49525  3.92537  3.39851  4.07310  4.44462  1.65312  3.79518  1.61590  3.33029  4.10749  4.42276  4.01039  3.95503  2.60936  3.13036  1.72128  5.05048  3.86585    108 l - - -
          2.68618  4.42225  2.77519  2.73123  3.46354  2.40513  3.72494  3.29354  2.67741  2.69355  4.24690  2.90347  2.73739  3.18146  2.89801  2.37887  2.77519  2.98518  4.58477  3.61503
          0.01910  4.36335  5.08570  0.61958  0.77255  0.48576  0.95510
     88   2.82956  5.01761  2.79047  2.03248  4.51482  3.41938  3.94013  3.91827  2.77858  3.52823  4.37412  3.07214  1.35203  3.11341  3.21587  2.85517  2.76054  3.53858  5.75252  4.40483    109 p - - -
          2.68618  4.42225  2.77519  2.73123  3.46354  2.40513  3.72494  3.29354  2.67741  2.69355  4.24690  2.90347  2.73739  3.18146  2.89801  2.37887  2.77519  2.98518  4.58477  3.61503
          0.01910  4.36335  5.08570  0.61958  0.77255  0.48576  0.95510
     89   2.65825  4.69431  3.16781  2.36013  3.89296  3.52615  3.27500  2.85696  2.59488  2.93522  2.91240  3.10817  2.75049  2.93861  3.03126  2.14395  2.89037  3.00398  5.22870  3.93083    110 s - - -
          2.68623  4.42230  2.77525  2.73128  3.46359  2.40518  3.72464  3.29359  2.67746  2.69360  4.24552  2.90352  2.73745  3.18151  2.89806  2.37892  2.77525  2.98478  4.58482  3.61508
          0.29824  1.37954  5.08570  0.17956  1.80570  0.48576  0.95510
     90   2.72580  5.21251  2.56311  1.83180  4.53719  3.10236  2.80380  4.01733  2.44878  3.51027  4.26625  2.49933  3.86229  2.78450  2.95004  2.40736  2.59505  3.59371  5.65599  4.24223    112 e - - -
          2.68618  4.42225  2.77519  2.73123  3.46354  2.40513  3.72494  3.29354  2.67741  2.69355  4.24690  2.90347  2.73739  3.18146  2.89801  2.37887  2.77519  2.98518  4.58477  3.61503
          0.01910  4.36335  5.08570  0.61958  0.77255  0.48576  0.95510
     91   2.67839  4.25220  3.84090  3.26232  3.34661  3.72526  3.16223  2.29522  2.64723  1.67371  3.01397  3.58068  4.09542  3.44062  3.42487  2.99379  2.90943  2.30530  4.84938  3.64294    113 l - - -
          2.68618  4.42225  2.77519  2.73123  3.46354  2.40513  3.72494  3.29354  2.67741  2.69355  4.24690  2.90347  2.73739  3.18146  2.89801  2.37887  2.77519  2.98518  4.58477  3.61503
          0.01910  4.36335  5.08570  0.61958  0.77255  0.48576  0.95510
     92   2.67591  4.25584  3.10661  3.24329  2.65715  3.72320  4.00270  1.90766  3.17154  2.27318  3.36075  2.90848  4.09639  3.44083  3.45423  2.99037  2.90872  2.12728  4.86539  3.64847    114 i - - -
          2.68618  4.42225  2.77519  2.73123  3.46354  2.40513  3.72494  3.29354  2.67741  2.69355  4.24690  2.90347  2.73739  3.18146  2.89801  2.37887  2.77519  2.98518  4.58477  3.61503
          0.01910  4.36335  5.08570  0.61958  0.77255  0.48576  0.95510
     93   2.38013  3.76050  3.36959  2.80687  3.64656  2.87131  3.82542  3.01838  2.77308  2.31174  3.58756  2.82423  3.39314  3.09502  2.91253  2.81584  2.88307  2.77483  5.05568  2.66422    115 l - - -
          2.68618  4.42225  2.77519  2.73123  3.46354  2.40513  3.72494  3.29354  2.67741  2.69355  4.24690  2.90347  2.73739  3.18146  2.89801  2.37887  2.77519  2.98518  4.58477  3.61503
          0.01910  4.36335  5.08570  0.61958  0.77255  0.48576  0.95510
     94   2.66223  4.61173  3.24893  2.30247  3.35946  3.55539  3.77556  3.17041  2.31750  2.53954  3.70069  3.16776  3.94126  2.99928  3.07418  2.77894  2.42569  2.90795  5.14790  2.49388    116 e - - -
          2.68618  4.42225  2.77519  2.73123  3.46354  2.40513  3.72494  3.29354  2.67741  2.69355  4.24690  2.90347  2.73739  3.18146  2.89801  2.37887  2.77519  2.98518  4.58477  3.61503
          0.01910  4.36335  5.08570  0.61958  0.77255  0.48576  0.95510
     95   2.28953  4.47402  4.53668  4.00935  3.46086  4.13526  4.64504  2.26631  3.87944  1.10082  3.32610  4.21781  4.52714  4.11427  4.06783  3.48669  3.29036  1.83280  5.26148  4.10188    117 l - - -
          2.68618  4.42225  2.77519  2.73123  3.46354  2.40513  3.72494  3.29354  2.67741  2.69355  4.24690  2.90347  2.73739  3.18146  2.89801  2.37887  2.77519  2.98518  4.58477  3.61503
          0.01910  4.36335  5.08570  0.61958  0.77255  0.48576  0.95510
     96   2.28919  4.86567  3.08882  2.53967  4.12873  3.50063  2.92573  3.53989  1.83507  3.14302  3.96071  3.04945  3.90069  2.86618  2.90819  2.44515  2.91977  2.60249  5.38070  4.05637    118 k - - -
          2.68618  4.42225  2.77519  2.73123  3.46354  2.40513  3.72494  3.29354  2.67741  2.69355  4.24690  2.90347  2.73739  3.18146  2.89801  2.37887  2.77519  2.98518  4.58477  3.61503
          0.01910  4.36335  5.08570  0.61958  0.77255  0.48576  0.95510
     97   2.66558  4.80769  3.10068  2.54238  4.03159  2.78129  3.70967  3.07736  2.01592  2.83809  3.88382  3.05271  2.96701  2.66444  2.95740  2.71599  2.89615  3.13253  5.31750  3.08278    119 k - - -
          2.68618  4.42225  2.77519  2.73123  3.46354  2.40513  3.72494  3.29354  2.67741  2.69355  4.24690  2.90347  2.73739  3.18146  2.89801  2.37887  2.77519  2.98518  4.58477  3.61503
          0.01910  4.36335  5.08570  0.61958  0.77255  0.48576  0.95510
     98   1.23078  4.60671  3.37612  2.93070  4.33297  2.47613  4.04128  3.73704  2.82239  3.37393  4.20431  3.30070  3.93579  3.23897  2.33655  2.71071  2.96270  3.32132  5.60805  4.34511    120 a - - -
          2.68618  4.42225  2.77519  2.73123  3.46354  2.40513  3.72494  3.29354  2.67741  2.69355  4.24690  2.90347  2.73739  3.18146  2.89801  2.37887  2.77519  2.98518  4.58477  3.61503
          0.01910  4.36335  5.08570  0.61958  0.77255  0.48576  0.95510
     99   2.99631  4.39050  4.49867  3.96659  1.57839  4.05624  3.13802  2.19166  3.81414  2.12519  3.47163  4.00111  4.40297  3.94520  3.91475  3.36380  3.22458  2.65779  4.25277  2.05739    121 f - - -
          2.68618  4.42225  2.77519  2.73123  3.46354  2.40513  3.72494  3.29354  2.67741  2.69355  4.24690  2.90347  2.73739  3.18146  2.89801  2.37887  2.77519  2.98518  4.58477  3.61503
          0.01910  4.36335  5.08570  0.61958  0.77255  0.48576  0.95510
    100   2.70737  4.89627  2.07650  1.94984  2.98252  3.49502  3.73272  2.80869  2.55998  3.12918  3.96662  3.02464  3.90864  2.89310  3.02828  2.73989  2.94288  3.19180  5.39139  4.04355    122 e - - -
          2.68618  4.42225  2.77519  2.73123  3.46354  2.40513  3.72494  3.29354  2.67741  2.69355  4.24690  2.90347  2.73739  3.18146  2.89801  2.37887  2.77519  2.98518  4.58477  3.61503
          0.01910  4.36335  5.08570  0.61958  0.77255  0.48576  0.95510
    101   2.68678  4.94555  2.46156  2.47217  4.22439  2.37339  3.70510  3.65306  2.48952  2.40806  4.03763  2.99787  3.88347  2.84567  2.45913  2.51238  2.92566  3.30681  5.45451  4.10424    123 g - - -
          2.68618  4.42225  2.77519  2.73123  3.46354  2.40513  3.72494  3.29354  2.67741  2.69355  4.24690  2.90347  2.73739  3.18146  2.89801  2.37887  2.77519  2.98518  4.58477  3.61503
          0.01910  4.36335  5.08570  0.61958  0.77255  0.48576  0.95510
    102   2.09954  4.32479  3.74437  3.23510  3.65995  3.50211  4.10313  2.93268  3.16702  1.53997  3.62508  3.52595  4.02413  3.46700  3.47177  2.25405  2.47936  2.68559  5.12858  3.91268    124 l - - -
          2.68618  4.42225  2.77519  2.73123  3.46354  2.40513  3.72494  3.29354  2.67741  2.69355  4.24690  2.90347  2.73739  3.18146  2.89801  2.37887  2.77519  2.98518  4.58477  3.61503
          0.01910  4.36335  5.08570  0.61958  0.77255  0.48576  0.95510
    103   2.77683  5.21761  2.97775  1.97895  4.57367  3.50726  3.66513  4.02851  1.99020  3.50224  4.26817  2.98059  3.90636  1.99734  2.41674  2.42543  2.99912  3.61700  5.61983  4.25629    125 e - - -
          2.68618  4.42225  2.77519  2.73123  3.46354  2.40513  3.72494  3.29354  2.67741  2.69355  4.24690  2.90347  2.73739  3.18146  2.89801  2.37887  2.77519  2.98518  4.58477  3.61503
          0.01910  4.36335  5.08570  0.61958  0.77255  0.48576  0.95510
    104   2.67401  5.12405  2.46516  2.17774  4.44377  3.44313  3.28311  2.98976  2.13182  3.41751  4.17267  2.92000  2.94593  2.40243  2.87373  2.64650  2.90583  3.50125  5.57039  4.17449    126 k - - -
          2.68618  4.42225  2.77519  2.73123  3.46354  2.40513  3.72494  3.29354  2.67741  2.69355  4.24690  2.90347  2.73739  3.18146  2.89801  2.37887  2.77519  2.98518  4.58477  3.61503
          0.01910  4.36335  5.08570  0.61958  0.77255  0.48576  0.95510
    105   1.83264  4.79485  2.83112  2.55105  4.05463  2.84558  3.74066  2.79807  2.56739  3.08512  3.91154  3.05815  3.89732  2.57960  3.02211  2.52334  2.90608  3.14697  5.34832  4.02744    127 a - - -
          2.68618  4.42225  2.77519  2.73123  3.46354  2.40513  3.72494  3.29354  2.67741  2.69355  4.24690  2.90347  2.73739  3.18146  2.89801  2.37887  2.77519  2.98518  4.58477  3.61503
          0.01910  4.36335  5.08570  0.61958  0.77255  0.48576  0.95510
    106   2.28516  4.22453  4.54489  3.95738  2.19796  4.01225  4.35048  2.12911  3.80832  2.12942  2.55218  4.08309  4.35446  3.98159  3.91534  3.32202  3.06613  1.65417  4.89539  3.72141    128 v - - -
          2.68618  4.42225  2.77519  2.73123  3.46354  2.40513  3.72494  3.29354  2.67741  2.69355  4.24690  2.90347  2.73739  3.18146  2.89801  2.37887  2.77519  2.98518  4.58477  3.61503
          0.01910  4.36335  5.08570  0.61958  0.77255  0.48576  0.95510
    107   2.06692  3.00838  3.23819  2.07721  4.00069  3.44080  3.83950  3.39011  2.69998  3.04590  3.88548  3.16581  3.90886  3.03593  3.12928  2.30034  2.34634  3.07224  5.33228  4.04139    129 a - - -
          2.68618  4.42225  2.77519  2.73123  3.46354  2.40513  3.72494  3.29354  2.67741  2.69355  4.24690  2.90347  2.73739  3.18146  2.89801  2.37887  2.77519  2.98518  4.58477  3.61503
          0.01910  4.36335  5.08570  0.61958  0.77255  0.48576  0.95510
    108   2.46408  5.38087  2.38003  1.50863  4.69840  3.42347  3.75576  4.19280  2.58842  3.67533  4.44811  2.30347  3.91499  2.36375  3.11220  2.78358  3.09854  3.76032  5.81880  4.37631    130 e - - -
          2.68618  4.42225  2.77519  2.73123  3.46354  2.40513  3.72494  3.29354  2.67741  2.69355  4.24690  2.90347  2.73739  3.18146  2.89801  2.37887  2.77519  2.98518  4.58477  3.61503
          0.01910  4.36335  5.08570  0.61958  0.77255  0.48576  0.95510
    109   2.51631  4.33185  4.77932  4.20151  2.42853  4.22518  4.58925  1.47080  4.05488  1.79391  3.25869  4.31726  4.54023  4.21356  4.14744  3.54963  3.21804  1.78218  5.07584  3.90915    131 i - - -
          2.68618  4.42225  2.77519  2.73123  3.46354  2.40513  3.72494  3.29354  2.67741  2.69355  4.24690  2.90347  2.73739  3.18146  2.89801  2.37887  2.77519  2.98518  4.58477  3.61503
          0.01910  4.36335  5.08570  0.61958  0.77255  0.48576  0.95510
    110   2.91069  4.41261  4.14473  2.63006  3.41938  4.02073  4.32584  2.01518  3.48779  1.34142  3.31963  3.90034  4.36218  3.75602  3.74319  3.30981  3.14442  2.00811  5.09187  3.90842    132 l - - -
          2.68618  4.42225  2.77519  2.73123  3.46354  2.40513  3.72494  3.29354  2.67741  2.69355  4.24690  2.90347  2.73739  3.18146  2.89801  2.37887  2.77519  2.98518  4.58477  3.61503
          0.01910  4.36335  5.08570  0.61958  0.77255  0.48576  0.95510
    111   2.77206  5.14736  3.05807  1.94675  4.48405  3.52837  3.66735  3.92103  1.95060  3.42195  4.20196  3.01312  3.91594  2.55244  2.10329  2.75211  2.99130  2.74076  5.56015  4.21734    133 e - - -
          2.68618  4.42225  2.77519  2.73123  3.46354  2.40513  3.72494  3.29354  2.67741  2.69355  4.24690  2.90347  2.73739  3.18146  2.89801  2.37887  2.77519  2.98518  4.58477  3.61503
          0.01910  4.36335  5.08570  0.61958  0.77255  0.48576  0.95510
    112   1.98965  4.92595  2.93702  2.15093  4.32225  2.63729  3.77092  3.75710  2.58133  3.33568  4.13544  2.72739  3.88904  2.91497  3.05322  2.70349  2.11269  3.38047  5.54950  4.19552    134 a - - -
          2.68618  4.42225  2.77519  2.73123  3.46354  2.40513  3.72494  3.29354  2.67741  2.69355  4.24690  2.90347  2.73739  3.18146  2.89801  2.37887  2.77519  2.98518  4.58477  3.61503
          0.01910  4.36335  5.08570  0.61958  0.77255  0.48576  0.95510
    113   2.68296  4.58614  3.31596  2.75386  3.75933  3.58247  3.80175  2.60730  2.26787  2.14804  3.67813  3.21597  3.96822  2.76203  3.04779  2.10687  2.91335  2.87351  5.13664  3.87086    135 s - - -
          2.68618  4.42225  2.77519  2.73123  3.46354  2.40513  3.72494  3.29354  2.67741  2.69355  4.24690  2.90347  2.73739  3.18146  2.89801  2.37887  2.77519  2.98518  4.58477  3.61503
          0.01910  4.36335  5.08570  0.61958  0.77255  0.48576  0.95510
    114   2.90480  5.24562  3.13739  2.59540  4.64166  3.60056  3.70945  4.06035  1.36685  3.52799  4.32603  2.29287  3.99827  2.82696  2.24988  2.58515  3.11623  3.67677  5.62551  4.32486    136 k - - -
          2.68618  4.42225  2.77519  2.73123  3.46354  2.40513  3.72494  3.29354  2.67741  2.69355  4.24690  2.90347  2.73739  3.18146  2.89801  2.37887  2.77519  2.98518  4.58477  3.61503
          0.01910  4.36335  5.08570  0.61958  0.77255  0.48576  0.95510
    115   2.68892  4.50924  3.83786  3.51372  4.10312  3.44651  4.47621  3.17150  3.45429  3.04602  4.10564  3.71444  1.01947  3.80688  3.72720  2.91038  3.11998  2.07080  5.61407  4.37359    137 p - - -
          2.68618  4.42225  2.77519  2.73123  3.46354  2.40513  3.72494  3.29354  2.67741  2.69355  4.24690  2.90347  2.73739  3.18146  2.89801  2.37887  2.77519  2.98518  4.58477  3.61503
          0.01910  4.36335  5.08570  0.61958  0.77255  0.48576  0.95510
    116   2.88828  5.31302  1.66592  2.36069  4.69864  3.40536  3.85074  4.17771  2.74423  3.70643  4.51030  2.03198  3.95234  2.99566  3.27502  2.84012  1.94620  3.75658  5.87723  4.44263    138 d - - -
          2.68618  4.42225  2.77519  2.73123  3.46354  2.40513  3.72494  3.29354  2.67741  2.69355  4.24690  2.90347  2.73739  3.18146  2.89801  2.37887  2.77519  2.98518  4.58477  3.61503
          0.01910  4.36335  5.08570  0.61958  0.77255  0.48576  0.95510
    117   2.84206  2.28348  4.45855  3.88795  3.03715  3.93618  4.16368  2.57809  3.69191  1.67051  3.27710  3.99173  4.30933  3.89540  3.80671  3.25773  3.08533  2.44592  2.15313  3.31045    139 l - - -
          2.68618  4.42225  2.77519  2.73123  3.46354  2.40513  3.72494  3.29354  2.67741  2.69355  4.24690  2.90347  2.73739  3.18146  2.89801  2.37887  2.77519  2.98518  4.58477  3.61503
          0.01910  4.36335  5.08570  0.61958  0.77255  0.48576  0.95510
    118   3.28315  4.55287  5.17676  4.63273  3.54268  4.68186  5.13553  1.25457  4.51634  1.88245  2.41027  4.78712  4.92027  4.66350  4.61878  4.04563  3.52281  1.36377  5.50284  4.37037    140 i - - -
          2.68618  4.42225  2.77519  2.73123  3.46354  2.40513  3.72494  3.29354  2.67741  2.69355  4.24690  2.90347  2.73739  3.18146  2.89801  2.37887  2.77519  2.98518  4.58477  3.61503
          0.01910  4.36335  5.08570  0.61958  0.77255  0.48576  0.95510
    119   3.16286  4.48938  5.00202  4.41198  2.01576  4.40671  4.72899  2.09227  4.25402  1.48390  2.30503  4.52026  4.66302  4.32957  4.29423  3.73724  3.38740  1.71709  5.08735  3.97825    141 l - - -
          2.68618  4.42225  2.77519  2.73123  3.46354  2.40513  3.72494  3.29354  2.67741  2.69355  4.24690  2.90347  2.73739  3.18146  2.89801  2.37887  2.77519  2.98518  4.58477  3.61503
          0.01910  4.36335  5.08570  0.61958  0.77255  0.48576  0.95510
    120   2.74063  4.39012  3.70056  3.14756  2.47569  3.72406  3.26012  2.88790  3.08557  2.58612  3.50517  3.49832  4.10367  3.36846  3.40110  2.46246  2.40318  2.67412  4.68497  2.01265    142 y - - -
          2.68618  4.42225  2.77519  2.73123  3.46354  2.40513  3.72494  3.29354  2.67741  2.69355  4.24690  2.90347  2.73739  3.18146  2.89801  2.37887  2.77519  2.98518  4.58477  3.61503
          0.01910  4.36335  5.08570  0.61958  0.77255  0.48576  0.95510
    121   3.60787  5.72480  0.41195  2.78514  5.18911  3.66667  4.47616  4.90909  3.66812  4.43495  5.45061  3.35702  4.35407  3.73397  4.23114  3.53219  3.96503  4.50299  6.24829  5.01521    143 D - - -
          2.68618  4.42225  2.77519  2.73123  3.46354  2.40513  3.72494  3.29354  2.67741  2.69355  4.24690  2.90347  2.73739  3.18146  2.89801  2.37887  2.77519  2.98518  4.58477  3.61503
          0.09017  4.36335  2.61063  0.61958  0.77255  0.48576  0.95510
    122   2.27952  4.27960  4.55303  3.96304  2.14736  4.05393  4.36724  2.08266  3.81781  1.62908  2.45051  4.10968  4.37466  3.97230  3.92490  3.36196  3.11335  2.30162  4.87988  3.72472    144 l - - -
          2.68618  4.42225  2.77519  2.73123  3.46354  2.40513  3.72494  3.29354  2.67741  2.69355  4.24690  2.90347  2.73739  3.18146  2.89801  2.37887  2.77519  2.98518  4.58477  3.61503
          0.02049  4.29368  5.01602  0.61958  0.77255  0.43027  1.05078
    123   2.00127  4.43037  4.32713  3.80465  1.48903  3.98167  4.25042  2.57858  3.68780  1.90725  3.34578  3.99314  4.37956  3.90136  3.87550  3.31298  3.20076  2.48225  4.78464  3.40102    145 f - - -
          2.68618  4.42225  2.77519  2.73123  3.46354  2.40513  3.72494  3.29354  2.67741  2.69355  4.24690  2.90347  2.73739  3.18146  2.89801  2.37887  2.77519  2.98518  4.58477  3.61503
          0.01910  4.36335  5.08570  0.61958  0.77255  0.48576  0.95510
    124   2.15217  4.64958  3.20411  2.65757  2.48936  3.53642  3.10318  3.23325  2.63829  2.89281  3.74655  3.14180  3.37309  2.47385  3.06428  2.58782  2.89607  2.96038  5.18918  3.89543    146 a - - -
          2.68618  4.42225  2.77519  2.73123  3.46354  2.40513  3.72494  3.29354  2.67741  2.69355  4.24690  2.90347  2.73739  3.18146  2.89801  2.37887  2.77519  2.98518  4.58477  3.61503
          0.01910  4.36335  5.08570  0.61958  0.77255  0.48576  0.95510
    125   2.49977  3.75113  3.24628  2.68674  3.79245  3.19975  2.83187  3.17936  2.65658  2.84721  3.70543  3.16384  2.51485  2.65392  3.07553  2.77097  2.88857  2.91381  3.27345  3.87799    147 a - - -
          2.68618  4.42225  2.77519  2.73123  3.46354  2.40513  3.72494  3.29354  2.67741  2.69355  4.24690  2.90347  2.73739  3.18146  2.89801  2.37887  2.77519  2.98518  4.58477  3.61503
          0.01910  4.36335  5.08570  0.61958  0.77255  0.48576  0.95510
    126   3.97474  5.15906  5.02771  4.75591  1.65760  4.67058  3.76276  3.57767  4.54047  2.83023  4.14609  4.41587  4.98869  4.48210  4.51689  4.10095  4.20307  3.54677  0.89965  2.15824    148 w - - -
          2.68618  4.42225  2.77519  2.73123  3.46354  2.40513  3.72494  3.29354  2.67741  2.69355  4.24690  2.90347  2.73739  3.18146  2.89801  2.37887  2.77519  2.98518  4.58477  3.61503
          0.01910  4.36335  5.08570  0.61958  0.77255  0.48576  0.95510
    127   1.92020  4.27974  4.22018  3.65259  3.44012  3.93287  4.29871  2.05493  3.55353  1.91626  3.38686  3.90107  4.30557  3.79943  3.77596  3.23285  2.46707  1.80520  5.02638  3.82894    149 v - - -
          2.68618  4.42225  2.77519  2.73123  3.46354  2.40513  3.72494  3.29354  2.67741  2.69355  4.24690  2.90347  2.73739  3.18146  2.89801  2.37887  2.77519  2.98518  4.58477  3.61503
          0.01910  4.36335  5.08570  0.61958  0.77255  0.48576  0.95510
    128   1.52391  4.36963  3.76180  3.31172  4.01138  3.35206  4.26672  3.16074  3.27248  3.02744  3.94627  3.54452  1.93836  3.57457  3.59283  2.74331  2.93125  2.04187  5.45639  4.23653    150 a - - -
          2.68618  4.42225  2.77519  2.73123  3.46354  2.40513  3.72494  3.29354  2.67741  2.69355  4.24690  2.90347  2.73739  3.18146  2.89801  2.37887  2.77519  2.98518  4.58477  3.61503
          0.01910  4.36335  5.08570  0.61958  0.77255  0.48576  0.95510
    129   2.96499  5.52884  1.55349  1.88117  4.83254  3.41569  3.83335  4.33973  2.73624  3.81989  4.61650  2.87137  2.18676  2.62595  3.28921  2.87632  3.22731  3.90425  5.96860  4.49683    151 d - - -
          2.68618  4.42225  2.77519  2.73123  3.46354  2.40513  3.72494  3.29354  2.67741  2.69355  4.24690  2.90347  2.73739  3.18146  2.89801  2.37887  2.77519  2.98518  4.58477  3.61503
          0.01910  4.36335  5.08570  0.61958  0.77255  0.48576  0.95510
    130   2.32506  4.41976  4.71605  4.14835  3.41005  4.29138  4.66627  1.27609  4.01820  1.76027  2.67432  4.33403  4.59920  4.20885  4.16255  3.61605  3.29163  2.03718  5.19349  4.03913    152 i - - -
          2.68618  4.42225  2.77519  2.73123  3.46354  2.40513  3.72494  3.29354  2.67741  2.69355  4.24690  2.90347  2.73739  3.18146  2.89801  2.37887  2.77519  2.98518  4.58477  3.61503
          0.01910  4.36335  5.08570  0.61958  0.77255  0.48576  0.95510
    131   0.48932  4.52002  4.04563  3.89399  4.62542  3.32592  4.84460  3.83268  3.92565  3.68805  4.68467  3.89253  4.11331  4.22256  4.11957  2.87643  3.18921  3.39399  5.99699  4.86687    153 A - - -
          2.68618  4.42225  2.77519  2.73123  3.46354  2.40513  3.72494  3.29354  2.67741  2.69355  4.24690  2.90347  2.73739  3.18146  2.89801  2.37887  2.77519  2.98518  4.58477  3.61503
          0.01910  4.36335  5.08570  0.61958  0.77255  0.48576  0.95510
    132   2.30796  5.02380  2.99056  1.99821  4.31244  3.47500  3.66325  3.75282  2.01282  3.30023  4.08365  2.97265  3.86860  2.78593  2.65110  2.68136  2.68395  3.38452  5.48786  3.03175    154 e - - -
          2.68618  4.42225  2.77519  2.73123  3.46354  2.40513  3.72494  3.29354  2.67741  2.69355  4.24690  2.90347  2.73739  3.18146  2.89801  2.37887  2.77519  2.98518  4.58477  3.61503
          0.01910  4.36335  5.08570  0.61958  0.77255  0.48576  0.95510
    133   2.79685  5.25576  2.81642  1.67491  4.59363  3.47170  3.70092  4.06008  2.02193  3.54571  4.31658  2.94380  3.90768  2.31054  2.86024  2.22392  3.03008  3.64654  5.67947  4.28984    155 e - - -
          2.68618  4.42225  2.77519  2.73123  3.46354  2.40513  3.72494  3.29354  2.67741  2.69355  4.24690  2.90347  2.73739  3.18146  2.89801  2.37887  2.77519  2.98518  4.58477  3.61503
          0.01910  4.36335  5.08570  0.61958  0.77255  0.48576  0.95510
    134   2.79400  4.24723  4.25215  3.67948  2.71434  3.88496  3.10963  2.64313  3.54768  1.56540  2.37716  3.84926  4.24097  3.74575  3.70940  3.17747  3.02403  2.48744  4.57208  2.47297    156 l - - -
          2.68618  4.42225  2.77519  2.73123  3.46354  2.40513  3.72494  3.29354  2.67741  2.69355  4.24690  2.90347  2.73739  3.18146  2.89801  2.37887  2.77519  2.98518  4.58477  3.61503
          0.01910  4.36335  5.08570  0.61958  0.77255  0.48576  0.95510
    135   2.71533  5.13989  2.36728  2.37735  4.44907  2.65899  3.68067  3.91347  2.45590  3.43349  3.31027  2.06319  3.86696  2.39765  2.94765  2.68811  2.95261  3.51410  5.60048  4.20452    157 n - - -
          2.68618  4.42225  2.77519  2.73123  3.46354  2.40513  3.72494  3.29354  2.67741  2.69355  4.24690  2.90347  2.73739  3.18146  2.89801  2.37887  2.77519  2.98518  4.58477  3.61503
          0.01910  4.36335  5.08570  0.61958  0.77255  0.48576  0.95510
    136   2.31868  4.47519  4.84876  4.34635  3.77069  4.38871  5.01893  0.99127  4.24346  2.38863  3.59861  4.52104  4.76635  4.49948  4.43454  3.76725  3.39423  1.57083  5.60946  4.40714    158 i - - -
          2.68618  4.42225  2.77519  2.73123  3.46354  2.40513  3.72494  3.29354  2.67741  2.69355  4.24690  2.90347  2.73739  3.18146  2.89801  2.37887  2.77519  2.98518  4.58477  3.61503
          0.01910  4.36335  5.08570  0.61958  0.77255  0.48576  0.95510
    137   2.27031  4.93870  3.03050  2.48228  4.26041  3.45998  3.69366  3.69339  2.23670  3.26125  4.05352  3.00223  2.78647  2.82584  2.57202  2.21374  2.43787  3.33069  5.46678  4.11659    159 s - - -
          2.68618  4.42225  2.77519  2.73123  3.46354  2.40513  3.72494  3.29354  2.67741  2.69355  4.24690  2.90347  2.73739  3.18146  2.89801  2.37887  2.77519  2.98518  4.58477  3.61503
          0.01910  4.36335  5.08570  0.61958  0.77255  0.48576  0.95510
    138   2.24820  2.97835  3.40195  2.83791  3.65588  3.57766  3.84151  3.02842  2.77830  2.72187  3.59921  2.93443  3.97396  3.11480  2.35012  2.51117  2.88981  2.78283  3.21011  3.81112    160 a - - -
          2.68618  4.42225  2.77519  2.73123  3.46354  2.40513  3.72494  3.29354  2.67741  2.69355  4.24690  2.90347  2.73739  3.18146  2.89801  2.37887  2.77519  2.98518  4.58477  3.61503
          0.01910  4.36335  5.08570  0.61958  0.77255  0.48576  0.95510
    139   1.83973  4.28133  4.49892  3.92979  2.61675  4.05855  4.43706  1.84941  3.80728  2.26331  3.34423  4.10295  4.41396  4.01510  3.96435  3.37410  3.11821  1.59172  5.03898  3.84548    161 v - - -
          2.68618  4.42225  2.77519  2.73123  3.46354  2.40513  3.72494  3.29354  2.67741  2.69355  4.24690  2.90347  2.73739  3.18146  2.89801  2.37887  2.77519  2.98518  4.58477  3.61503
          0.01910  4.36335  5.08570  0.61958  0.77255  0.48576  0.95510
    140   2.26381  4.38842  3.50900  2.94389  3.51586  3.62494  2.80152  2.54912  2.89406  2.21855  3.49235  3.35410  4.00650  3.20299  3.25078  2.22868  2.88656  2.66231  4.96003  3.25729    162 l - - -
          2.68618  4.42225  2.77519  2.73123  3.46354  2.40513  3.72494  3.29354  2.67741  2.69355  4.24690  2.90347  2.73739  3.18146  2.89801  2.37887  2.77519  2.98518  4.58477  3.61503
          0.01910  4.36335  5.08570  0.61958  0.77255  0.48576  0.95510
    141   4.16226  5.25621  5.11278  4.91688  0.73317  4.80060  3.66300  3.76053  4.72911  3.00067  4.32574  4.42757  5.08421  4.54448  4.64457  4.19693  4.37471  3.71212  3.76128  1.41539    163 f - - -
          2.68618  4.42225  2.77519  2.73123  3.46354  2.40513  3.72494  3.29354  2.67741  2.69355  4.24690  2.90347  2.73739  3.18146  2.89801  2.37887  2.77519  2.98518  4.58477  3.61503
          0.01910  4.36335  5.08570  0.61958  0.77255  0.48576  0.95510
    142   2.64797  3.30627  3.68514  3.11318  3.40320  3.66554  3.93343  2.46579  3.04564  2.13536  3.38941  2.87704  4.04242  2.72077  3.35489  2.48347  2.88005  2.54696  3.17674  3.65318    164 l - - -
          2.68618  4.42225  2.77519  2.73123  3.46354  2.40513  3.72494  3.29354  2.67741  2.69355  4.24690  2.90347  2.73739  3.18146  2.89801  2.37887  2.77519  2.98518  4.58477  3.61503
          0.01910  4.36335  5.08570  0.61958  0.77255  0.48576  0.95510
    143   2.14290  4.36058  3.71022  3.19081  3.68377  3.54906  4.09548  1.95795  3.13434  2.70251  3.63362  3.51455  2.10002  3.43775  3.45900  2.87255  2.48480  2.59563  5.15666  3.93356    165 i - - -
          2.68618  4.42225  2.77519  2.73123  3.46354  2.40513  3.72494  3.29354  2.67741  2.69355  4.24690  2.90347  2.73739  3.18146  2.89801  2.37887  2.77519  2.98518  4.58477  3.61503
          0.01910  4.36335  5.08570  0.61958  0.77255  0.48576  0.95510
    144   2.27021  3.46136  4.09611  3.51377  2.53140  2.80717  4.06387  2.57094  3.39803  2.00894  3.25988  3.72449  4.11613  3.62212  3.58650  3.02472  2.48925  2.15232  4.76131  3.56835    166 l - - -
          2.68618  4.42225  2.77519  2.73123  3.46354  2.40513  3.72494  3.29354  2.67741  2.69355  4.24690  2.90347  2.73739  3.18146  2.89801  2.37887  2.77519  2.98518  4.58477  3.61503
          0.01910  4.36335  5.08570  0.61958  0.77255  0.48576  0.95510
    145   2.59374  4.77704  3.08659  2.63146  4.41430  2.51816  3.87124  3.86114  2.68652  3.43738  4.22491  2.34708  2.61473  3.01929  3.14483  1.92744  2.36808  3.42131  5.63706  4.29998    167 s - - -
          2.68618  4.42225  2.77519  2.73123  3.46354  2.40513  3.72494  3.29354  2.67741  2.69355  4.24690  2.90347  2.73739  3.18146  2.89801  2.37887  2.77519  2.98518  4.58477  3.61503
          0.01910  4.36335  5.08570  0.61958  0.77255  0.48576  0.95510
    146   0.75146  4.32429  3.87166  3.63828  4.60670  3.12158  4.62913  3.97497  3.68136  3.72652  4.56312  3.64229  3.91479  3.94382  3.93257  1.94936  2.92555  3.39005  5.97454  4.79235    168 a - - -
          2.68618  4.42225  2.77519  2.73123  3.46354  2.40513  3.72494  3.29354  2.67741  2.69355  4.24690  2.90347  2.73739  3.18146  2.89801  2.37887  2.77519  2.98518  4.58477  3.61503
          0.01910  4.36335  5.08570  0.61958  0.77255  0.48576  0.95510
    147   2.36416  4.23244  3.78574  3.21118  3.34992  3.68643  3.96513  2.32727  3.13574  2.43498  3.34331  2.75590  4.06182  3.40479  3.41654  2.69180  2.54955  2.13726  3.34380  3.23333    169 v - - -
          2.68618  4.42225  2.77519  2.73123  3.46354  2.40513  3.72494  3.29354  2.67741  2.69355  4.24690  2.90347  2.73739  3.18146  2.89801  2.37887  2.77519  2.98518  4.58477  3.61503
          0.01910  4.36335  5.08570  0.61958  0.77255  0.48576  0.95510
    148   2.21841  4.86016  3.03287  2.53816  4.24848  3.42791  2.88111  3.67958  2.55908  3.26751  4.07067  2.58676  3.88320  2.90929  3.01739  1.81681  2.55715  3.31321  5.48841  4.14797    170 s - - -
          2.68618  4.42225  2.77519  2.73123  3.46354  2.40513  3.72494  3.29354  2.67741  2.69355  4.24690  2.90347  2.73739  3.18146  2.89801  2.37887  2.77519  2.98518  4.58477  3.61503
          0.01910  4.36335  5.08570  0.61958  0.77255  0.48576  0.95510
    149   2.66376  2.97432  3.87776  3.29813  3.32709  3.72111  4.00184  2.02553  2.69898  2.06281  2.95349  3.59896  4.09256  2.77245  3.44877  2.99252  2.89537  2.45162  4.82399  3.62031    171 i - - -
          2.68618  4.42225  2.77519  2.73123  3.46354  2.40513  3.72494  3.29354  2.67741  2.69355  4.24690  2.90347  2.73739  3.18146  2.89801  2.37887  2.77519  2.98518  4.58477  3.61503
          0.01910  4.36335  5.08570  0.61958  0.77255  0.48576  0.95510
    150   2.26777  1.82670  4.12542  3.58707  3.49795  3.58991  4.22457  2.28597  3.48095  2.54564  3.48356  3.74941  4.10151  3.72208  3.69361  2.29403  2.92008  2.25354  5.01110  3.81731    172 c - - -
          2.68567  4.42238  2.77532  2.73136  3.46367  2.40526  3.72411  3.29367  2.67754  2.69334  4.24703  2.90360  2.73752  3.18159  2.89814  2.37900  2.77532  2.98491  4.58290  3.61516
          0.24645  1.55003  5.08570  0.99330  0.46259  0.48576  0.95510
    151   3.34695  4.70346  4.61160  4.15452  1.13828  4.29230  2.75452  2.47726  4.00816  2.73025  3.81292  4.10081  4.62334  4.08852  4.10499  3.61142  3.57067  3.03502  3.99373  1.82190    176 f - - -
          2.68618  4.42225  2.77519  2.73123  3.46354  2.40513  3.72494  3.29354  2.67741  2.69355  4.24690  2.90347  2.73739  3.18146  2.89801  2.37887  2.77519  2.98518  4.58477  3.61503
          0.01910  4.36335  5.08570  0.61958  0.77255  0.48576  0.95510
    152   2.91201  4.31120  4.55060  3.96976  2.18820  4.08492  4.40216  1.78738  3.83009  1.72970  3.19738  4.12827  4.41489  4.00558  3.95650  3.39511  2.14324  2.23309  4.93641  3.74939    177 l - - -
          2.68618  4.42225  2.77519  2.73123  3.46354  2.40513  3.72494  3.29354  2.67741  2.69355  4.24690  2.90347  2.73739  3.18146  2.89801  2.37887  2.77519  2.98518  4.58477  3.61503
          0.25006  4.36335  1.56775  0.61958  0.77255  0.48576  0.95510
    153   2.85150  5.29262  1.53192  2.24479  4.58806  2.28744  2.81064  4.11882  2.68301  3.63839  4.45604  2.81211  3.87463  2.92030  3.21919  2.78892  3.12630  3.70920  5.78589  4.33692    178 d - - -
          2.68618  4.42225  2.77519  2.73123  3.46354  2.40513  3.72494  3.29354  2.67741  2.69355  4.24690  2.90347  2.73739  3.18146  2.89801  2.37887  2.77519  2.98518  4.58477  3.61503
          0.02401  4.13729  4.85964  0.61958  0.77255  0.74954  0.63976
    154   2.53785  4.36467  3.38374  2.84192  3.62892  2.81412  3.83911  2.98047  2.80449  2.21273  3.57319  3.24572  2.97106  3.12254  3.17945  2.46952  2.55620  2.38271  5.04471  3.79823    179 l - - -
          2.68618  4.42225  2.77519  2.73123  3.46354  2.40513  3.72494  3.29354  2.67741  2.69355  4.24690  2.90347  2.73739  3.18146  2.89801  2.37887  2.77519  2.98518  4.58477  3.61503
          0.02401  4.13729  4.85964  0.61958  0.77255  0.74954  0.63976
    155   2.58882  4.36128  3.56404  3.08696  3.69170  3.47083  4.05044  2.13581  3.01159  2.63009  3.62668  3.42743  1.87886  3.35626  3.33895  2.81642  2.53787  2.53210  5.18997  3.95285    180 p - - -
          2.68618  4.42225  2.77519  2.73123  3.46354  2.40513  3.72494  3.29354  2.67741  2.69355  4.24690  2.90347  2.73739  3.18146  2.89801  2.37887  2.77519  2.98518  4.58477  3.61503
          0.02401  4.13729  4.85964  0.61958  0.77255  0.74954  0.63976
    156   2.33824  4.93311  3.00388  2.46722  4.29180  2.84855  3.64271  3.71661  1.92737  3.26484  4.06364  2.97473  3.84523  2.77432  2.23821  2.44279  2.90492  3.35053  5.44451  4.11556    181 k - - -
          2.68618  4.42225  2.77519  2.73123  3.46354  2.40513  3.72494  3.29354  2.67741  2.69355  4.24690  2.90347  2.73739  3.18146  2.89801  2.37887  2.77519  2.98518  4.58477  3.61503
          0.02401  4.13729  4.85964  0.61958  0.77255  0.54511  0.86697
    157   2.66817  5.14975  2.46161  2.02896  4.47831  2.90768  3.62246  3.95618  2.37871  3.44801  4.20004  2.87372  3.29486  2.53271  2.45113  2.35926  2.90278  3.53256  5.59120  4.18344    182 e - - -
          2.68618  4.42225  2.77519  2.73123  3.46354  2.40513  3.72494  3.29354  2.67741  2.69355  4.24690  2.90347  2.73739  3.18146  2.89801  2.37887  2.77519  2.98518  4.58477  3.61503
          0.02146  4.24818  4.97053  0.61958  0.77255  0.63616  0.75358
    158   2.66252  5.03452  2.91967  2.11402  4.33479  3.43520  3.63025  3.78184  2.06364  3.31602  4.09308  2.68124  3.83503  2.40542  2.82663  2.64983  2.42538  2.89221  5.49191  4.12112    183 k - - -
          2.68618  4.42225  2.77519  2.73123  3.46354  2.40513  3.72494  3.29354  2.67741  2.69355  4.24690  2.90347  2.73739  3.18146  2.89801  2.37887  2.77519  2.98518  4.58477  3.61503
          0.02146  4.24818  4.97053  0.61958  0.77255  0.63616  0.75358
    159   2.79522  4.20694  4.43372  3.84108  2.49429  3.94770  4.25757  2.00197  3.69459  1.66088  2.38481  3.99297  4.28108  3.86356  3.16465  3.25010  3.02433  2.15859  4.80444  3.64527    184 l - - -
          2.68618  4.42225  2.77519  2.73123  3.46354  2.40513  3.72494  3.29354  2.67741  2.69355  4.24690  2.90347  2.73739  3.18146  2.89801  2.37887  2.77519  2.98518  4.58477  3.61503
          0.02146  4.24818  4.97053  0.61958  0.77255  0.63616  0.75358
    160   2.65778  4.63762  3.22919  2.68710  3.88525  2.21753  3.77838  2.70271  1.98170  2.90476  3.77649  3.15536  3.92777  2.98297  2.97319  2.76591  2.90484  2.64018  5.22967  3.94912    185 k - - -
          2.68624  4.42231  2.77510  2.73130  3.46360  2.40519  3.72501  3.29360  2.67747  2.69361  4.24696  2.90353  2.73714  3.18115  2.89807  2.37873  2.77526  2.98525  4.58483  3.61509
          0.56082  1.05901  2.49546  0.15355  1.94951  0.63616  0.75358
    161   2.60179  4.54092  2.93081  2.64260  3.71579  2.93688  3.72683  3.10041  2.61845  2.33868  3.63427  3.11769  3.88577  2.95349  2.75961  2.54710  2.83434  2.61987  5.08991  2.95414    187 l - - -
          2.68618  4.42225  2.77519  2.73123  3.46354  2.40513  3.72494  3.29354  2.67741  2.69355  4.24690  2.90347  2.73739  3.18146  2.89801  2.37887  2.77519  2.98518  4.58477  3.61503
          0.02323  4.16966  4.89201  0.61958  0.77255  0.71901  0.66793
    162   2.65031  4.81098  3.04871  2.33270  3.41834  3.47080  3.00255  3.45699  1.86742  3.05783  3.88588  3.00742  3.86108  2.82145  2.85711  2.69001  2.87860  3.14518  5.23201  3.00019    188 k - - -
          2.68618  4.42225  2.77519  2.73123  3.46354  2.40513  3.72494  3.29354  2.67741  2.69355  4.24690  2.90347  2.73739  3.18146  2.89801  2.37887  2.77519  2.98518  4.58477  3.61503
          0.02323  4.16966  4.89201  0.61958  0.77255  0.71901  0.66793
    163   2.46952  5.20336  1.87748  2.27746  4.53713  3.35053  3.69201  4.01427  2.33177  3.52589  4.30904  2.31104  3.84129  2.82089  3.03885  2.27050  3.00386  3.60046  5.68988  4.26865    189 d - - -
          2.68618  4.42225  2.77519  2.73123  3.46354  2.40513  3.72494  3.29354  2.67741  2.69355  4.24690  2.90347  2.73739  3.18146  2.89801  2.37887  2.77519  2.98518  4.58477  3.61503
          0.12576  4.16966  2.27580  0.61958  0.77255  0.71901  0.66793
    164   2.70780  4.30125  3.90444  3.38484  3.50708  3.72800  4.21839  2.07063  3.29212  2.33890  3.42745  3.69056  2.57246  3.60037  3.57892  3.05681  2.99143  1.49237  5.12295  3.90092    190 v - - -
          2.68618  4.42225  2.77519  2.73123  3.46354  2.40513  3.72494  3.29354  2.67741  2.69355  4.24690  2.90347  2.73739  3.18146  2.89801  2.37887  2.77519  2.98518  4.58477  3.61503
          0.02571  4.06961  4.79195  0.61958  0.77255  0.80765  0.59042
    165   2.05610  4.60023  3.17941  2.68943  4.17425  3.29731  3.79218  3.57184  2.49389  3.19143  4.02507  3.10850  3.82754  2.96972  1.93658  2.05940  2.86394  3.19531  5.41441  4.13753    191 r - - -
          2.68629  4.42236  2.77498  2.73134  3.46365  2.40524  3.72506  3.29365  2.67685  2.69366  4.24701  2.90340  2.73751  3.18157  2.89812  2.37876  2.77506  2.98529  4.58488  3.61514
          0.46200  1.01700  4.79195  0.67766  0.70888  0.43332  1.04512
    166   2.06500  4.30444  3.22583  3.17464  3.40116  3.71777  3.99920  2.44898  3.11043  1.81364  2.62190  3.53186  4.09100  3.39251  3.41745  2.98191  2.92279  2.44405  4.92058  3.70807    194 l - - -
          2.68618  4.42225  2.77519  2.73123  3.46354  2.40513  3.72494  3.29354  2.67741  2.69355  4.24690  2.90347  2.73739  3.18146  2.89801  2.37887  2.77519  2.98518  4.58477  3.61503
          0.02049  4.29368  5.01602  0.61958  0.77255  0.58144  0.81892
    167   3.00612  5.40041  2.57793  1.10255  4.56742  3.46156  2.51459  4.19319  2.65347  3.69646  4.54041  2.95386  4.00117  3.00699  3.09816  2.94295  3.26446  3.81013  5.76167  4.32924    195 e - - -
          2.68618  4.42225  2.77519  2.73123  3.46354  2.40513  3.72494  3.29354  2.67741  2.69355  4.24690  2.90347  2.73739  3.18146  2.89801  2.37887  2.77519  2.98518  4.58477  3.61503
          0.02049  4.29368  5.01602  0.61958  0.77255  0.58144  0.81892
    168   2.78920  5.32582  2.01355  1.95045  4.65133  3.39982  3.70185  4.14630  2.13800  3.62143  4.38414  2.30417  3.87251  2.54615  3.02453  2.51742  3.03363  3.70831  5.75698  4.31957    196 e - - -
          2.68618  4.42225  2.77519  2.73123  3.46354  2.40513  3.72494  3.29354  2.67741  2.69355  4.24690  2.90347  2.73739  3.18146  2.89801  2.37887  2.77519  2.98518  4.58477  3.61503
          0.02049  4.29368  5.01602  0.61958  0.77255  0.58144  0.81892
    169   2.71547  4.13061  4.38683  3.79282  2.32867  3.86069  4.16740  1.93775  3.63956  1.90679  2.84296  3.91861  4.21278  3.81442  3.74810  3.16171  2.37305  2.29448  4.72755  3.07455    197 l - - -
          2.68618  4.42225  2.77519  2.73123  3.46354  2.40513  3.72494  3.29354  2.67741  2.69355  4.24690  2.90347  2.73739  3.18146  2.89801  2.37887  2.77519  2.98518  4.58477  3.61503
          0.02049  4.29368  5.01602  0.61958  0.77255  0.43027  1.05078
    170   2.72497  3.09433  4.48297  3.88797  3.22201  3.89277  4.22818  2.10953  3.72323  1.70941  3.21767  3.98155  4.25055  3.89733  3.81257  3.19955  2.66554  1.72494  4.78296  3.12704    198 l - - -
          2.68618  4.42225  2.77519  2.73123  3.46354  2.40513  3.72494  3.29354  2.67741  2.69355  4.24690  2.90347  2.73739  3.18146  2.89801  2.37887  2.77519  2.98518  4.58477  3.61503
          0.11930  4.36335  2.30532  0.61958  0.77255  0.48576  0.95510
    171   2.62355  4.78307  3.05455  2.55123  4.16162  2.13552  3.74472  3.57956  2.53231  3.18343  3.99854  2.42942  3.86532  2.90257  2.57180  2.44605  2.89378  2.71852  5.41770  4.09454    199 g - - -
          2.68618  4.42225  2.77519  2.73123  3.46354  2.40513  3.72494  3.29354  2.67741  2.69355  4.24690  2.90347  2.73739  3.18146  2.89801  2.37887  2.77519  2.98518  4.58477  3.61503
          0.14824  4.26514  2.08972  0.61958  0.77255  0.61640  0.77628
    172   3.14871  4.85199  3.78618  3.67000  4.62833  3.52475  4.71797  4.25241  3.75222  3.84595  4.91272  3.94578  0.45193  4.13243  3.95990  3.32643  3.61283  3.86535  5.73211  4.75526    200 P - - -
          2.68618  4.42225  2.77519  2.73123  3.46354  2.40513  3.72494  3.29354  2.67741  2.69355  4.24690  2.90347  2.73739  3.18146  2.89801  2.37887  2.77519  2.98518  4.58477  3.61503
          0.11397  4.14083  2.38811  0.61958  0.77255  0.74630  0.64267
    173   2.44702  4.48370  2.97409  2.71160  4.29327  3.12116  3.96624  3.75533  2.84954  3.38763  4.21847  2.75111  1.67031  3.17822  3.23912  2.01766  2.85440  3.29051  5.58939  4.28927    201 p - - -
          2.68618  4.42225  2.77519  2.73123  3.46354  2.40513  3.72494  3.29354  2.67741  2.69355  4.24690  2.90347  2.73739  3.18146  2.89801  2.37887  2.77519  2.98518  4.58477  3.61503
          0.02614  4.05300  4.77535  0.61958  0.77255  0.82083  0.57993
    174   2.62691  4.75563  3.00526  2.29619  3.99568  3.43575  3.64577  3.38667  2.11549  2.42271  3.84352  2.98834  3.05348  2.81169  2.81808  2.67661  2.63879  3.08304  5.26660  3.95686    202 k - - -
          2.68618  4.42225  2.77519  2.73123  3.46354  2.40513  3.72494  3.29354  2.67741  2.69355  4.24690  2.90347  2.73739  3.18146  2.89801  2.37887  2.77519  2.98518  4.58477  3.61503
          0.02614  4.05300  4.77535  0.61958  0.77255  0.59215  0.80551
    175   2.91480  4.48747  3.91031  3.36976  1.94298  3.86304  3.76331  2.95982  2.31041  2.56495  3.57333  3.63123  4.22782  3.49795  3.41571  3.15299  3.14310  2.77951  2.12258  2.73739    203 f - - -
          2.68618  4.42225  2.77519  2.73123  3.46354  2.40513  3.72494  3.29354  2.67741  2.69355  4.24690  2.90347  2.73739  3.18146  2.89801  2.37887  2.77519  2.98518  4.58477  3.61503
          0.02280  4.18799  4.91034  0.61958  0.77255  0.49641  0.93831
    176   2.94084  4.31350  4.61416  4.04366  3.28342  4.15409  4.46655  1.38894  3.90037  1.97842  3.27193  4.19604  4.47789  4.09112  4.03062  3.47233  3.17659  1.70485  4.98356  2.60981    204 i - - -
          2.68618  4.42225  2.77519  2.73123  3.46354  2.40513  3.72494  3.29354  2.67741  2.69355  4.24690  2.90347  2.73739  3.18146  2.89801  2.37887  2.77519  2.98518  4.58477  3.61503
          0.02049  4.29368  5.01602  0.61958  0.77255  0.43027  1.05078
    177   3.53762  5.18155  4.19993  4.12730  5.03709  3.84295  5.13717  4.74490  4.23383  4.30089  5.38890  4.37312  0.27327  4.60465  4.39775  3.72611  4.02069  4.32673  6.05563  5.17247    205 P - - -
          2.68618  4.42225  2.77519  2.73123  3.46354  2.40513  3.72494  3.29354  2.67741  2.69355  4.24690  2.90347  2.73739  3.18146  2.89801  2.37887  2.77519  2.98518  4.58477  3.61503
          0.30206  4.36335  1.39445  0.61958  0.77255  0.48576  0.95510
    178   2.67076  4.43453  3.58568  3.23997  2.09091  1.39597  4.04699  3.18046  3.26120  2.83872  3.85303  3.51334  4.01532  3.54948  3.55692  2.87208  3.03796  2.92776  4.86898  3.41193    206 g - - -
          2.68618  4.42225  2.77519  2.73123  3.46354  2.40513  3.72494  3.29354  2.67741  2.69355  4.24690  2.90347  2.73739  3.18146  2.89801  2.37887  2.77519  2.98518  4.58477  3.61503
          0.02527  4.08656  4.80891  0.61958  0.77255  0.33237  1.26310
    179   3.14680  4.50657  4.74746  4.20281  1.42204  4.25976  4.19441  2.64745  4.04328  1.68863  2.37013  4.24897  4.55867  4.13316  4.11154  3.57803  3.37030  2.63619  4.50132  2.48772    207 f - - -
          2.68618  4.42225  2.77519  2.73123  3.46354  2.40513  3.72494  3.29354  2.67741  2.69355  4.24690  2.90347  2.73739  3.18146  2.89801  2.37887  2.77519  2.98518  4.58477  3.61503
          0.01910  4.36335  5.08570  0.61958  0.77255  0.48576  0.95510
    180   3.02832  5.33315  2.65565  1.28585  4.76401  3.47675  3.98918  4.24131  2.86283  3.78671  4.63987  3.05201  1.64895  3.15759  3.33499  2.99415  3.32454  3.84282  5.92770  4.55606    208 e - - -
          2.68618  4.42225  2.77519  2.73123  3.46354  2.40513  3.72494  3.29354  2.67741  2.69355  4.24690  2.90347  2.73739  3.18146  2.89801  2.37887  2.77519  2.98518  4.58477  3.61503
          0.01910  4.36335  5.08570  0.61958  0.77255  0.48576  0.95510
    181   2.62793  4.65037  3.21795  2.71740  4.01857  3.44550  3.85550  3.40635  2.70839  2.49853  3.91180  2.49843  3.92269  3.05484  3.12798  1.89393  2.05483  3.08950  5.35076  4.05802    209 s - - -
          2.68618  4.42225  2.77519  2.73123  3.46354  2.40513  3.72494  3.29354  2.67741  2.69355  4.24690  2.90347  2.73739  3.18146  2.89801  2.37887  2.77519  2.98518  4.58477  3.61503
          0.13340  4.36335  2.18793  0.61958  0.77255  0.48576  0.95510
    182   2.73024  5.18936  1.94174  2.31944  4.51829  3.39325  3.67795  3.99317  2.12842  3.49849  4.26895  2.48770  3.84963  2.79709  2.97230  2.37358  2.52007  3.57829  5.65480  4.24300    210 d - - -
          2.68618  4.42225  2.77519  2.73123  3.46354  2.40513  3.72494  3.29354  2.67741  2.69355  4.24690  2.90347  2.73739  3.18146  2.89801  2.37887  2.77519  2.98518  4.58477  3.61503
          0.10142  4.25134  2.49862  0.61958  0.77255  0.63253  0.75768
    183   2.97924  4.38522  4.43709  3.89104  3.01247  4.11856  4.25772  1.35899  3.72854  1.88938  3.24421  4.07481  4.44144  3.95000  3.89206  3.43637  3.21318  2.19572  4.72828  2.37745    211 i - - -
          2.68618  4.42225  2.77519  2.73123  3.46354  2.40513  3.72494  3.29354  2.67741  2.69355  4.24690  2.90347  2.73739  3.18146  2.89801  2.37887  2.77519  2.98518  4.58477  3.61503
          0.02315  4.17308  4.89543  0.61958  0.77255  0.71567  0.67112
    184   2.63935  4.88906  3.00631  2.44435  4.15095  3.07878  3.24209  3.57473  2.09041  3.15172  3.95562  2.96390  3.83646  2.32867  2.61472  2.65706  2.86684  2.78241  5.36532  3.41194    212 k - - -
          2.68618  4.42225  2.77519  2.73123  3.46354  2.40513  3.72494  3.29354  2.67741  2.69355  4.24690  2.90347  2.73739  3.18146  2.89801  2.37887  2.77519  2.98518  4.58477  3.61503
          0.02315  4.17308  4.89543  0.61958  0.77255  0.71567  0.67112
    185   2.60714  4.41782  2.64217  2.78659  3.52831  3.54839  3.25404  2.71292  2.75091  2.29471  2.79804  3.22655  3.93016  3.06911  3.13610  2.78368  2.83865  2.69518  4.95856  3.02489    213 l - - -
          2.68618  4.42225  2.77519  2.73123  3.46354  2.40513  3.72494  3.29354  2.67741  2.69355  4.24690  2.90347  2.73739  3.18146  2.89801  2.37887  2.77519  2.98518  4.58477  3.61503
          0.02315  4.17308  4.89543  0.61958  0.77255  0.71567  0.67112
    186   3.22778  5.31039  3.70399  2.96726  4.81608  3.81032  3.69277  4.13872  1.46741  3.54342  4.42410  3.33913  4.16308  2.82504  1.15713  3.21676  3.37316  3.82517  5.54850  4.41906    214 r - - -
          2.68618  4.42225  2.77519  2.73123  3.46354  2.40513  3.72494  3.29354  2.67741  2.69355  4.24690  2.90347  2.73739  3.18146  2.89801  2.37887  2.77519  2.98518  4.58477  3.61503
          0.16779  4.17308  1.97280  0.61958  0.77255  0.71567  0.67112
    187   2.53410  4.30121  3.47375  2.95097  3.55576  3.44692  3.89792  2.78483  2.88361  2.22224  3.51407  3.31920  2.55821  3.21227  3.22515  2.47493  2.82162  2.11613  5.01895  3.77675    215 v - - -
          2.68618  4.42225  2.77519  2.73123  3.46354  2.40513  3.72494  3.29354  2.67741  2.69355  4.24690  2.90347  2.73739  3.18146  2.89801  2.37887  2.77519  2.98518  4.58477  3.61503
          0.02671  4.03199  4.75434  0.61958  0.77255  0.60828  0.78589
    188   3.08966  4.58318  4.12238  3.65532  1.78469  3.99875  3.67742  3.09848  3.56364  2.67380  3.72218  3.78856  4.37356  3.74489  3.77246  2.34877  3.33106  2.92214  4.01453  1.43079    216 y - - -
          2.68618  4.42225  2.77519  2.73123  3.46354  2.40513  3.72494  3.29354  2.67741  2.69355  4.24690  2.90347  2.73739  3.18146  2.89801  2.37887  2.77519  2.98518  4.58477  3.61503
          0.02323  4.16966  4.89201  0.61958  0.77255  0.48490  0.95649
    189   2.99148  5.31413  2.83524  1.15505  4.67321  3.53752  3.80431  4.12234  2.42354  3.61766  4.45443  3.05155  4.02075  2.94626  2.13275  2.95288  3.22843  3.75002  5.72570  4.40048    217 e - - -
          2.68618  4.42225  2.77519  2.73123  3.46354  2.40513  3.72494  3.29354  2.67741  2.69355  4.24690  2.90347  2.73739  3.18146  2.89801  2.37887  2.77519  2.98518  4.58477  3.61503
          0.02049  4.29368  5.01602  0.61958  0.77255  0.58144  0.81892
    190   2.17458  4.18474  4.07174  3.50047  2.98346  3.77198  4.12551  1.97619  3.40006  2.35508  3.31546  3.74252  4.15867  3.64108  3.61861  2.43039  2.92683  1.81005  4.86390  3.66374    218 v - - -
          2.68618  4.42225  2.77519  2.73123  3.46354  2.40513  3.72494  3.29354  2.67741  2.69355  4.24690  2.90347  2.73739  3.18146  2.89801  2.37887  2.77519  2.98518  4.58477  3.61503
          0.02049  4.29368  5.01602  0.61958  0.77255  0.43027  1.05078
    191   2.81705  5.05480  3.14249  2.21582  4.34362  3.57891  3.71661  3.24940  1.35077  2.96644  4.11908  3.09088  3.96865  2.85213  2.68545  2.82723  3.03469  3.38425  5.49281  4.18347    219 k - - -
          2.68618  4.42225  2.77519  2.73123  3.46354  2.40513  3.72494  3.29354  2.67741  2.69355  4.24690  2.90347  2.73739  3.18146  2.89801  2.37887  2.77519  2.98518  4.58477  3.61503
          0.01910  4.36335  5.08570  0.61958  0.77255  0.48576  0.95510
    192   2.70451  5.14982  2.15381  2.38858  4.47498  3.45434  3.65567  3.94073  2.14167  3.44272  4.20277  2.44726  3.86084  2.76448  2.24711  2.67493  2.93613  2.99912  5.59117  4.20026    220 k - - -
          2.68618  4.42225  2.77519  2.73123  3.46354  2.40513  3.72494  3.29354  2.67741  2.69355  4.24690  2.90347  2.73739  3.18146  2.89801  2.37887  2.77519  2.98518  4.58477  3.61503
          0.01910  4.36335  5.08570  0.61958  0.77255  0.48576  0.95510
    193   2.45394  4.33681  4.72914  4.14085  2.52065  4.17692  4.50947  1.48255  3.98816  1.68970  2.62162  4.26159  4.48648  4.12818  4.07224  3.49406  3.20107  2.22022  4.98368  3.83624    221 i - - -
          2.68618  4.42225  2.77519  2.73123  3.46354  2.40513  3.72494  3.29354  2.67741  2.69355  4.24690  2.90347  2.73739  3.18146  2.89801  2.37887  2.77519  2.98518  4.58477  3.61503
          0.01910  4.36335  5.08570  0.61958  0.77255  0.48576  0.95510
    194   2.67483  4.27062  3.78430  3.21406  2.64194  3.70839  3.97964  2.70927  3.13794  1.89647  2.58854  2.72577  2.94504  3.41214  3.42437  2.97430  2.90764  2.51643  4.84867  3.62450    222 l - - -
          2.68618  4.42225  2.77519  2.73123  3.46354  2.40513  3.72494  3.29354  2.67741  2.69355  4.24690  2.90347  2.73739  3.18146  2.89801  2.37887  2.77519  2.98518  4.58477  3.61503
          0.01910  4.36335  5.08570  0.61958  0.77255  0.48576  0.95510
    195   2.68077  5.13783  2.67898  1.85021  4.46153  3.44481  3.64216  3.93176  2.12557  3.43200  4.18603  2.72997  3.84549  2.74802  2.57152  2.65116  2.72145  3.51740  5.58044  3.06269    223 e - - -
          2.68618  4.42225  2.77519  2.73123  3.46354  2.40513  3.72494  3.29354  2.67741  2.69355  4.24690  2.90347  2.73739  3.18146  2.89801  2.37887  2.77519  2.98518  4.58477  3.61503
          0.13340  4.36335  2.18793  0.61958  0.77255  0.48576  0.95510
    196   2.48045  4.83761  2.76258  2.01246  2.99960  3.07967  3.66481  3.49377  2.46787  3.09630  3.90948  2.98394  3.84940  2.81576  2.73299  2.66584  2.86572  3.17001  5.33779  3.22617    224 e - - -
          2.68618  4.42225  2.77519  2.73123  3.46354  2.40513  3.72494  3.29354  2.67741  2.69355  4.24690  2.90347  2.73739  3.18146  2.89801  2.37887  2.77519  2.98518  4.58477  3.61503
          0.02139  4.25134  4.97369  0.61958  0.77255  0.63253  0.75768
    197   2.63277  4.70545  3.09516  2.23443  3.92165  3.48186  3.71007  3.30990  2.54598  2.31627  3.79686  2.68489  3.14638  2.89273  2.98724  2.70559  2.47567  2.76654  5.24188  3.93590    225 e - - -
          2.68619  4.42226  2.77520  2.73124  3.46355  2.40514  3.72495  3.29355  2.67742  2.69340  4.24691  2.90348  2.73740  3.18147  2.89802  2.37888  2.77520  2.98519  4.58478  3.61504
          0.07743  2.69426  4.97369  0.41441  1.08095  0.40384  1.10187
    198   2.72072  5.18314  2.52234  2.06085  4.50423  3.44403  2.81168  3.97617  2.05814  3.47587  4.23604  2.91732  3.86470  2.77976  2.91008  2.68520  2.12377  3.56212  5.62508  4.22336    227 k - - -
          2.68618  4.42225  2.77519  2.73123  3.46354  2.40513  3.72494  3.29354  2.67741  2.69355  4.24690  2.90347  2.73739  3.18146  2.89801  2.37887  2.77519  2.98518  4.58477  3.61503
          0.01910  4.36335  5.08570  0.61958  0.77255  0.48576  0.95510
    199   2.39720  4.73241  2.68801  2.26778  3.94180  3.51829  3.74760  3.31381  2.59501  2.47616  3.81999  3.09085  3.36853  2.93301  3.04050  2.74350  2.90214  2.16570  5.26956  3.96369    228 v - - -
          2.68618  4.42225  2.77519  2.73123  3.46354  2.40513  3.72494  3.29354  2.67741  2.69355  4.24690  2.90347  2.73739  3.18146  2.89801  2.37887  2.77519  2.98518  4.58477  3.61503
          0.06015  4.36335  3.08703  0.61958  0.77255  0.48576  0.95510
    200   2.64915  4.75123  3.09834  2.41139  3.96368  2.96662  3.11211  3.36698  2.54214  2.99928  3.83211  2.59541  3.88918  2.88777  2.99065  2.71224  2.42418  2.55014  5.27278  3.05746    229 e - - -
          2.68618  4.42225  2.77519  2.73123  3.46354  2.40513  3.72494  3.29354  2.67741  2.69355  4.24690  2.90347  2.73739  3.18146  2.89801  2.37887  2.77519  2.98518  4.58477  3.61503
          0.01989  4.32310  5.04545  0.61958  0.77255  0.45159  1.01229
    201   1.94581  4.47314  3.40285  2.32601  2.80571  3.58867  3.86309  2.96842  2.82367  2.70138  3.59079  3.28941  3.98664  3.14157  3.21003  2.83514  2.45878  2.42757  5.07003  3.81669    230 a - - -
          2.68618  4.42225  2.77519  2.73123  3.46354  2.40513  3.72494  3.29354  2.67741  2.69355  4.24690  2.90347  2.73739  3.18146  2.89801  2.37887  2.77519  2.98518  4.58477  3.61503
          0.01910  4.36335  5.08570  0.61958  0.77255  0.48576  0.95510
    202   2.68282  5.04782  2.94609  2.11629  4.34368  3.46056  3.66377  3.79101  2.14634  2.88829  4.10939  2.47312  3.86165  2.78366  2.88850  2.35527  2.30246  3.41293  5.51459  4.14168    231 e - - -
          2.68618  4.42225  2.77519  2.73123  3.46354  2.40513  3.72494  3.29354  2.67741  2.69355  4.24690  2.90347  2.73739  3.18146  2.89801  2.37887  2.77519  2.98518  4.58477  3.61503
          0.01910  4.36335  5.08570  0.61958  0.77255  0.48576  0.95510
    203   2.28523  4.85699  2.23246  2.59676  4.51904  1.57769  3.94742  3.95747  2.82885  3.54996  4.35452  3.08076  3.91495  3.11075  3.30686  2.72326  2.36000  3.51390  5.75871  4.40685    232 g - - -
          2.68618  4.42225  2.77519  2.73123  3.46354  2.40513  3.72494  3.29354  2.67741  2.69355  4.24690  2.90347  2.73739  3.18146  2.89801  2.37887  2.77519  2.98518  4.58477  3.61503
          0.01910  4.36335  5.08570  0.61958  0.77255  0.48576  0.95510
    204   2.46171  4.35273  3.59555  2.79729  3.51877  3.22592  3.94134  2.80059  2.98924  2.19151  3.48475  3.42529  4.03568  3.29070  3.32700  2.90088  2.16588  1.91232  4.97775  3.74910    233 v - - -
          2.68626  4.42233  2.77527  2.73107  3.46362  2.40520  3.72502  3.29362  2.67748  2.69305  4.24697  2.90311  2.73747  3.18154  2.89808  2.37894  2.77527  2.98526  4.58485  3.61511
          0.22152  1.64758  5.08570  0.67285  0.71386  0.48576  0.95510
    205   2.66717  5.05329  2.21355  2.40335  4.35154  3.45279  3.65089  3.80405  2.02421  2.90701  3.58834  2.61811  3.84924  2.76650  2.88819  2.48813  2.67878  3.41860  5.51628  4.13663    236 k - - -
          2.68618  4.42225  2.77519  2.73123  3.46354  2.40513  3.72494  3.29354  2.67741  2.69355  4.24690  2.90347  2.73739  3.18146  2.89801  2.37887  2.77519  2.98518  4.58477  3.61503
          0.11930  4.36335  2.30532  0.61958  0.77255  0.48576  0.95510
    206   2.26816  4.99590  1.77464  2.42414  4.51387  3.33376  3.80397  3.97513  2.65672  3.52561  4.31720  2.94889  3.18552  2.94692  3.15547  1.91966  2.99574  3.54360  5.71035  4.32292    237 d - - -
          2.68618  4.42225  2.77519  2.73123  3.46354  2.40513  3.72494  3.29354  2.67741  2.69355  4.24690  2.90347  2.73739  3.18146  2.89801  2.37887  2.77519  2.98518  4.58477  3.61503
          0.02109  4.26514  4.98749  0.61958  0.77255  0.61640  0.77628
    207   2.64402  4.58751  3.24787  2.69081  3.78841  3.15966  3.76514  2.72789  2.61597  2.83293  3.69719  2.53961  3.92395  2.98614  2.29278  2.76414  2.88054  2.24480  5.15076  3.87592    238 v - - -
          2.68618  4.42225  2.77519  2.73123  3.46354  2.40513  3.72494  3.29354  2.67741  2.69355  4.24690  2.90347  2.73739  3.18146  2.89801  2.37887  2.77519  2.98518  4.58477  3.61503
          0.02109  4.26514  4.98749  0.61958  0.77255  0.61640  0.77628
    208   3.04110  2.83380  4.61256  4.17087  1.00780  3.97334  4.16271  2.75076  4.01189  2.36060  3.55904  4.14882  4.45016  4.15864  4.10839  3.39201  3.35253  2.64012  4.49017  2.93505    239 f - - -
          2.68604  4.42245  2.77540  2.73143  3.46374  2.40533  3.72454  3.29374  2.67706  2.69319  4.24710  2.90367  2.73724  3.18167  2.89794  2.37907  2.77540  2.98539  4.58497  3.61328
          0.40352  1.58378  2.06486  1.47287  0.26041  0.41197  1.08573
    209   2.79756  5.24982  1.86119  2.35343  4.57664  3.42737  3.69148  4.05095  2.42381  3.54073  4.32342  2.90204  3.88652  2.03118  2.25079  2.75025  3.03583  3.64193  5.67601  4.28088    246 d - - -
          2.68618  4.42225  2.77519  2.73123  3.46354  2.40513  3.72494  3.29354  2.67741  2.69355  4.24690  2.90347  2.73739  3.18146  2.89801  2.37887  2.77519  2.98518  4.58477  3.61503
          0.02146  4.24818  4.97053  0.61958  0.77255  0.40204  1.10550
    210   3.43583  4.71674  5.24479  4.67049  3.27139  4.75831  5.09964  1.93661  4.53896  0.95697  2.25982  4.85416  4.92754  4.57467  4.58880  4.11230  3.65627  1.88222  5.34165  4.30301    247 l - - -
          2.68618  4.42225  2.77519  2.73123  3.46354  2.40513  3.72494  3.29354  2.67741  2.69355  4.24690  2.90347  2.73739  3.18146  2.89801  2.37887  2.77519  2.98518  4.58477  3.61503
          0.01910  4.36335  5.08570  0.61958  0.77255  0.48576  0.95510
    211   2.67477  5.02950  2.95426  2.27485  4.32186  2.95249  3.66322  3.76778  2.11616  2.75303  4.09265  2.43052  3.85888  2.78447  2.89708  2.29899  2.59981  3.39308  5.50138  4.13006    248 k - - -
          2.68618  4.42225  2.77519  2.73123  3.46354  2.40513  3.72494  3.29354  2.67741  2.69355  4.24690  2.90347  2.73739  3.18146  2.89801  2.37887  2.77519  2.98518  4.58477  3.61503
          0.01910  4.36335  5.08570  0.61958  0.77255  0.48576  0.95510
    212   2.28243  4.80188  3.12070  2.56710  4.03634  3.51373  3.72331  3.43725  2.13014  2.29157  3.88931  3.07161  3.90770  2.47426  2.94277  2.53042  2.58927  3.13260  5.32125  4.00888    249 k - - -
          2.68618  4.42225  2.77519  2.73123  3.46354  2.40513  3.72494  3.29354  2.67741  2.69355  4.24690  2.90347  2.73739  3.18146  2.89801  2.37887  2.77519  2.98518  4.58477  3.61503
          0.01910  4.36335  5.08570  0.61958  0.77255  0.48576  0.95510
    213   1.43645  4.33558  3.69071  3.18909  2.61110  2.75929  4.09920  3.08946  3.15099  2.82608  3.71788  3.47909  3.97985  3.44008  3.47707  2.77173  2.32590  2.80763  5.18838  3.95988    250 a - - -
          2.68618  4.42225  2.77519  2.73123  3.46354  2.40513  3.72494  3.29354  2.67741  2.69355  4.24690  2.90347  2.73739  3.18146  2.89801  2.37887  2.77519  2.98518  4.58477  3.61503
          0.01910  4.36335  5.08570  0.61958  0.77255  0.48576  0.95510
    214   2.67694  4.55028  3.31816  2.06571  3.66613  3.58733  3.81279  2.79001  2.73743  2.13416  3.64072  2.92468  3.97412  3.07242  3.13506  2.82363  2.90853  2.82793  5.07589  2.65875    251 e - - -
          2.68618  4.42225  2.77519  2.73123  3.46354  2.40513  3.72494  3.29354  2.67741  2.69355  4.24690  2.90347  2.73739  3.18146  2.89801  2.37887  2.77519  2.98518  4.58477  3.61503
          0.01910  4.36335  5.08570  0.61958  0.77255  0.48576  0.95510
    215   2.66410  4.63182  3.23651  2.67991  3.82227  3.54784  3.77406  3.20272  2.38252  2.40589  3.72677  3.15894  2.95535  2.73295  3.05093  2.30022  2.89709  2.26623  5.18033  3.89907    252 v - - -
          2.68618  4.42225  2.77519  2.73123  3.46354  2.40513  3.72494  3.29354  2.67741  2.69355  4.24690  2.90347  2.73739  3.18146  2.89801  2.37887  2.77519  2.98518  4.58477  3.61503
          0.01910  4.36335  5.08570  0.61958  0.77255  0.48576  0.95510
    216   2.65619  4.78671  3.20757  2.74603  4.45071  2.19989  3.90988  3.88773  2.61914  3.46206  4.26827  3.18298  3.92975  3.06756  1.93713  1.68541  2.98830  3.45762  5.64251  4.34284    253 s - - -
          2.68618  4.42225  2.77519  2.73123  3.46354  2.40513  3.72494  3.29354  2.67741  2.69355  4.24690  2.90347  2.73739  3.18146  2.89801  2.37887  2.77519  2.98518  4.58477  3.61503
          0.01910  4.36335  5.08570  0.61958  0.77255  0.48576  0.95510
    217   1.78736  1.36253  4.25265  3.90088  4.30975  3.13903  4.64370  3.64040  3.80758  3.41673  4.27481  3.75151  3.91713  4.03879  3.99753  1.66615  2.87640  3.16026  5.73536  4.57979    254 c - - -
          2.68618  4.42225  2.77519  2.73123  3.46354  2.40513  3.72494  3.29354  2.67741  2.69355  4.24690  2.90347  2.73739  3.18146  2.89801  2.37887  2.77519  2.98518  4.58477  3.61503
          0.01910  4.36335  5.08570  0.61958  0.77255  0.48576  0.95510
    218   2.73740  5.24339  2.08064  2.12696  4.57480  3.43412  2.88032  4.05952  2.09614  3.54105  4.29363  2.89981  3.86595  2.55687  2.93711  2.27623  2.97411  3.62791  5.67708  4.25996    255 d - - -
          2.68618  4.42225  2.77519  2.73123  3.46354  2.40513  3.72494  3.29354  2.67741  2.69355  4.24690  2.90347  2.73739  3.18146  2.89801  2.37887  2.77519  2.98518  4.58477  3.61503
          0.01910  4.36335  5.08570  0.61958  0.77255  0.48576  0.95510
    219   2.24466  4.14687  4.15062  3.56636  2.56471  2.89178  4.09757  2.51624  3.44628  2.05660  2.91037  3.77164  4.15262  3.66577  3.62579  3.07236  2.90965  1.81909  4.77359  3.58174    256 v - - -
          2.68618  4.42225  2.77519  2.73123  3.46354  2.40513  3.72494  3.29354  2.67741  2.69355  4.24690  2.90347  2.73739  3.18146  2.89801  2.37887  2.77519  2.98518  4.58477  3.61503
          0.01910  4.36335  5.08570  0.61958  0.77255  0.48576  0.95510
    220   2.91669  4.27900  4.70025  4.12117  2.35687  4.11775  4.39548  1.59077  3.95996  2.12369  3.24759  4.20286  4.44713  4.10976  4.03745  3.43620  3.15016  1.55874  4.85627  3.03320    257 v - - -
          2.68618  4.42225  2.77519  2.73123  3.46354  2.40513  3.72494  3.29354  2.67741  2.69355  4.24690  2.90347  2.73739  3.18146  2.89801  2.37887  2.77519  2.98518  4.58477  3.61503
          0.01910  4.36335  5.08570  0.61958  0.77255  0.48576  0.95510
    221   2.49655  4.30399  4.68724  4.10539  1.88880  4.14724  4.49081  1.90939  3.95766  1.82903  3.22634  4.22749  4.47119  4.11874  4.05603  3.46529  3.16997  1.76616  4.99355  3.81877    258 v - - -
          2.68618  4.42225  2.77519  2.73123  3.46354  2.40513  3.72494  3.29354  2.67741  2.69355  4.24690  2.90347  2.73739  3.18146  2.89801  2.37887  2.77519  2.98518  4.58477  3.61503
          0.01910  4.36335  5.08570  0.61958  0.77255  0.48576  0.95510
    222   2.90067  4.37586  4.23259  3.67169  3.23804  3.99342  2.90755  1.40378  3.48125  1.73239  3.29959  3.91926  4.34193  3.77363  3.68105  3.29695  3.13356  2.36667  4.88414  3.60978    259 i - - -
          2.68618  4.42225  2.77519  2.73123  3.46354  2.40513  3.72494  3.29354  2.67741  2.69355  4.24690  2.90347  2.73739  3.18146  2.89801  2.37887  2.77519  2.98518  4.58477  3.61503
          0.01910  4.36335  5.08570  0.61958  0.77255  0.48576  0.95510
    223   2.88517  5.21517  3.15829  2.59715  4.60473  3.59715  3.70425  4.02208  1.89103  3.49865  4.29633  2.49957  3.99023  2.82222  1.61115  2.31545  3.09735  3.64225  5.60456  4.30403    260 r - - -
          2.68618  4.42225  2.77519  2.73123  3.46354  2.40513  3.72494  3.29354  2.67741  2.69355  4.24690  2.90347  2.73739  3.18146  2.89801  2.37887  2.77519  2.98518  4.58477  3.61503
          0.01910  4.36335  5.08570  0.61958  0.77255  0.48576  0.95510
    224   2.44312  4.38317  3.70908  3.39996  4.50016  3.17127  4.44467  3.88089  3.41170  3.60087  4.43960  3.54083  3.91851  3.71841  3.71533  1.37346  1.24835  3.35327  5.85153  4.63539    261 t - - -
          2.68618  4.42225  2.77519  2.73123  3.46354  2.40513  3.72494  3.29354  2.67741  2.69355  4.24690  2.90347  2.73739  3.18146  2.89801  2.37887  2.77519  2.98518  4.58477  3.61503
          0.01910  4.36335  5.08570  0.61958  0.77255  0.48576  0.95510
    225   2.58381  1.88955  4.08853  3.58355  2.48241  3.50643  4.20290  2.89274  3.48148  2.65119  3.58894  3.71805  4.06783  3.72536  3.69931  1.77372  2.93047  2.64911  4.97329  3.68863    262 s - - -
          2.68618  4.42225  2.77519  2.73123  3.46354  2.40513  3.72494  3.29354  2.67741  2.69355  4.24690  2.90347  2.73739  3.18146  2.89801  2.37887  2.77519  2.98518  4.58477  3.61503
          0.01910  4.36335  5.08570  0.61958  0.77255  0.48576  0.95510
    226   2.74275  5.07284  3.05970  2.14764  4.38300  3.51787  3.67219  3.81428  2.13090  3.34488  3.24626  3.01411  3.90604  2.79362  1.86524  2.35396  2.96536  3.44658  5.51149  4.17043    263 r - - -
          2.68618  4.42225  2.77519  2.73123  3.46354  2.40513  3.72494  3.29354  2.67741  2.69355  4.24690  2.90347  2.73739  3.18146  2.89801  2.37887  2.77519  2.98518  4.58477  3.61503
          0.01910  4.36335  5.08570  0.61958  0.77255  0.48576  0.95510
    227   3.21486  5.77803  2.08799  0.78396  5.08244  3.43621  4.01609  4.62056  3.05505  4.11623  4.98910  2.91039  4.07640  3.19054  3.65271  3.08900  3.51260  4.18779  6.24090  4.74146    264 e - - -
          2.68618  4.42225  2.77519  2.73123  3.46354  2.40513  3.72494  3.29354  2.67741  2.69355  4.24690  2.90347  2.73739  3.18146  2.89801  2.37887  2.77519  2.98518  4.58477  3.61503
          0.01910  4.36335  5.08570  0.61958  0.77255  0.48576  0.95510
    228   3.47723  4.73431  5.31341  4.76784  3.39735  4.86867  5.27867  1.55997  4.64346  0.94037  3.16559  4.96786  5.03531  4.72036  4.72227  4.24642  3.70863  1.81804  5.51007  4.44596    265 l - - -
          2.68618  4.42225  2.77519  2.73123  3.46354  2.40513  3.72494  3.29354  2.67741  2.69355  4.24690  2.90347  2.73739  3.18146  2.89801  2.37887  2.77519  2.98518  4.58477  3.61503
          0.01910  4.36335  5.08570  0.61958  0.77255  0.48576  0.95510
    229   3.48853  5.61343  2.82691  0.48768  5.03948  3.67575  4.34452  4.60299  3.29890  4.14951  5.13360  3.34563  4.31263  3.56966  3.73840  3.43635  3.80653  4.24596  6.11104  4.87655    266 E - - -
          2.68618  4.42225  2.77519  2.73123  3.46354  2.40513  3.72494  3.29354  2.67741  2.69355  4.24690  2.90347  2.73739  3.18146  2.89801  2.37887  2.77519  2.98518  4.58477  3.61503
          0.01910  4.36335  5.08570  0.61958  0.77255  0.48576  0.95510
    230   2.47716  4.47514  3.42434  3.15766  4.64063  1.78040  4.34884  4.10229  3.30015  3.73699  4.53773  3.41201  1.48463  3.57903  3.66638  1.94144  2.95247  3.51065  5.93330  4.69011    267 p - - -
          2.68618  4.42225  2.77519  2.73123  3.46354  2.40513  3.72494  3.29354  2.67741  2.69355  4.24690  2.90347  2.73739  3.18146  2.89801  2.37887  2.77519  2.98518  4.58477  3.61503
          0.01910  4.36335  5.08570  0.61958  0.77255  0.48576  0.95510
    231   2.68483  5.01767  2.96628  1.83334  4.30696  2.82650  3.67230  3.74553  2.11254  3.29914  3.29701  2.96968  3.86879  2.79732  2.89164  2.68238  2.45544  3.37863  5.49287  4.12876    268 e - - -
          2.68618  4.42225  2.77519  2.73123  3.46354  2.40513  3.72494  3.29354  2.67741  2.69355  4.24690  2.90347  2.73739  3.18146  2.89801  2.37887  2.77519  2.98518  4.58477  3.61503
          0.13340  4.36335  2.18793  0.61958  0.77255  0.48576  0.95510
    232   3.20735  4.55089  4.61929  4.14898  1.97367  4.19806  3.74866  2.99377  3.98865  2.55315  3.63511  4.06651  4.52955  4.05287  4.05263  3.51967  3.43259  2.15655  1.78247  1.80517    269 w - - -
          2.68618  4.42225  2.77519  2.73123  3.46354  2.40513  3.72494  3.29354  2.67741  2.69355  4.24690  2.90347  2.73739  3.18146  2.89801  2.37887  2.77519  2.98518  4.58477  3.61503
          0.02139  4.25134  4.97369  0.61958  0.77255  0.40384  1.10187
    233   2.33005  3.15222  4.52583  3.95391  3.34856  4.02147  4.42596  2.01805  3.81113  1.27157  3.28110  4.10264  4.38898  4.00939  3.94844  3.34396  3.11245  2.14202  5.00660  3.83347    270 l - - -
          2.68618  4.42225  2.77519  2.73123  3.46354  2.40513  3.72494  3.29354  2.67741  2.69355  4.24690  2.90347  2.73739  3.18146  2.89801  2.37887  2.77519  2.98518  4.58477  3.61503
          0.01910  4.36335  5.08570  0.61958  0.77255  0.48576  0.95510
    234   3.04319  5.62801  1.30836  2.28684  4.92528  3.41362  3.88409  4.45348  2.82544  3.92708  4.74242  2.19376  3.99463  2.01549  3.39019  2.93916  3.31632  4.01187  6.06831  4.57535    271 d - - -
          2.68618  4.42225  2.77519  2.73123  3.46354  2.40513  3.72494  3.29354  2.67741  2.69355  4.24690  2.90347  2.73739  3.18146  2.89801  2.37887  2.77519  2.98518  4.58477  3.61503
          0.01910  4.36335  5.08570  0.61958  0.77255  0.48576  0.95510
    235   3.57432  4.85174  4.90427  4.49288  1.77980  4.51795  3.85791  3.10751  4.32355  1.49804  3.70085  4.32403  4.80794  4.31403  4.34691  3.85992  3.79292  3.07937  4.02436  1.26084    272 y - - -
          2.68618  4.42225  2.77519  2.73123  3.46354  2.40513  3.72494  3.29354  2.67741  2.69355  4.24690  2.90347  2.73739  3.18146  2.89801  2.37887  2.77519  2.98518  4.58477  3.61503
          0.01910  4.36335  5.08570  0.61958  0.77255  0.48576  0.95510
    236   2.73707  4.20035  4.19117  3.61458  2.43881  3.83316  4.04542  2.16728  3.49010  1.73540  3.27694  2.77627  4.19537  3.69848  3.66195  3.12325  2.96837  2.42640  4.63474  2.63830    273 l - - -
          2.68618  4.42225  2.77519  2.73123  3.46354  2.40513  3.72494  3.29354  2.67741  2.69355  4.24690  2.90347  2.73739  3.18146  2.89801  2.37887  2.77519  2.98518  4.58477  3.61503
          0.01910  4.36335  5.08570  0.61958  0.77255  0.48576  0.95510
    237   2.50520  4.89813  3.00241  2.06173  4.18996  3.09208  3.71489  3.61381  2.51274  2.60555  4.01122  3.01099  2.90321  2.85999  2.97924  2.09163  2.91229  3.27053  5.43515  4.09092    274 e - - -
          2.68618  4.42225  2.77519  2.73123  3.46354  2.40513  3.72494  3.29354  2.67741  2.69355  4.24690  2.90347  2.73739  3.18146  2.89801  2.37887  2.77519  2.98518  4.58477  3.61503
          0.01910  4.36335  5.08570  0.61958  0.77255  0.48576  0.95510
    238   2.70727  5.18569  2.48906  2.23660  4.52207  3.12977  3.65141  3.99694  1.94627  3.48290  4.23471  2.91977  3.85706  2.75614  2.20268  2.27786  2.93914  3.57293  5.61895  4.21903    275 k - - -
          2.68618  4.42225  2.77519  2.73123  3.46354  2.40513  3.72494  3.29354  2.67741  2.69355  4.24690  2.90347  2.73739  3.18146  2.89801  2.37887  2.77519  2.98518  4.58477  3.61503
          0.01910  4.36335  5.08570  0.61958  0.77255  0.48576  0.95510
    239   2.31502  4.56667  3.28743  2.72839  3.28554  3.56225  3.79342  3.11855  2.69372  2.03595  3.66217  2.94026  3.94927  2.67568  2.86444  2.36663  2.88921  2.86239  5.12189  3.85071    276 l - - -
          2.68618  4.42225  2.77519  2.73123  3.46354  2.40513  3.72494  3.29354  2.67741  2.69355  4.24690  2.90347  2.73739  3.18146  2.89801  2.37887  2.77519  2.98518  4.58477  3.61503
          0.01910  4.36335  5.08570  0.61958  0.77255  0.48576  0.95510
    240   2.72049  4.86653  3.16130  2.58470  4.09838  3.54515  3.22797  3.51119  2.10442  3.11391  2.91695  3.08537  3.92820  2.53449  2.41736  2.76464  2.94424  3.20212  5.34640  2.54682    277 k - - -
          2.68618  4.42225  2.77519  2.73123  3.46354  2.40513  3.72494  3.29354  2.67741  2.69355  4.24690  2.90347  2.73739  3.18146  2.89801  2.37887  2.77519  2.98518  4.58477  3.61503
          0.01910  4.36335  5.08570  0.61958  0.77255  0.48576  0.95510
    241   2.71503  5.03094  2.93080  2.16574  4.30689  2.13715  3.07133  3.74494  2.31737  2.65216  4.09763  2.73036  3.88675  2.82327  2.91152  2.71283  2.94762  3.38632  5.50215  4.14130    278 g - - -
          2.68618  4.42225  2.77519  2.73123  3.46354  2.40513  3.72494  3.29354  2.67741  2.69355  4.24690  2.90347  2.73739  3.18146  2.89801  2.37887  2.77519  2.98518  4.58477  3.61503
          0.01910  4.36335  5.08570  0.61958  0.77255  0.48576  0.95510
    242   2.80438  4.95804  3.14314  2.63690  4.26703  3.56019  3.76976  3.61636  1.51578  3.25019  4.09095  2.45278  3.98146  2.92467  2.77498  2.84114  3.04103  2.26738  5.47004  4.16740    279 k - - -
          2.68618  4.42225  2.77519  2.73123  3.46354  2.40513  3.72494  3.29354  2.67741  2.69355  4.24690  2.90347  2.73739  3.18146  2.89801  2.37887  2.77519  2.98518  4.58477  3.61503
          0.01910  4.36335  5.08570  0.61958  0.77255  0.48576  0.95510
    243   2.83650  5.22049  3.04450  2.11340  4.58233  3.55178  3.68844  4.01667  1.81876  3.49639  4.28102  3.03360  2.22251  2.80267  2.20338  2.80771  3.05335  3.62549  5.61293  4.28006    280 k - - -
          2.68618  4.42225  2.77519  2.73123  3.46354  2.40513  3.72494  3.29354  2.67741  2.69355  4.24690  2.90347  2.73739  3.18146  2.89801  2.37887  2.77519  2.98518  4.58477  3.61503
          0.01910  4.36335  5.08570  0.61958  0.77255  0.48576  0.95510
    244   2.79582  4.21253  4.43075  3.85593  2.54289  2.87270  4.31240  1.80636  3.72117  2.27982  3.30463  4.00866  4.32065  3.92311  3.86227  3.26745  3.03717  1.49256  4.90993  3.70838    281 v - - -
          2.68618  4.42225  2.77519  2.73123  3.46354  2.40513  3.72494  3.29354  2.67741  2.69355  4.24690  2.90347  2.73739  3.18146  2.89801  2.37887  2.77519  2.98518  4.58477  3.61503
          0.01910  4.36335  5.08570  0.61958  0.77255  0.48576  0.95510
    245   2.95925  4.31982  4.75447  4.16494  3.21673  4.16520  4.48340  1.61329  3.99644  1.52725  3.15608  4.26165  4.47807  4.13525  4.06631  3.48426  3.18979  1.80486  3.02807  3.76806    282 l - - -
          2.68619  4.42226  2.77520  2.73124  3.46355  2.40514  3.72495  3.29355  2.67742  2.69340  4.24691  2.90348  2.73740  3.18147  2.89802  2.37888  2.77520  2.98519  4.58478  3.61504
          0.06894  2.80627  5.08570  0.41441  1.08095  0.48576  0.95510
    246   2.73743  4.89006  3.03387  2.56583  4.07485  3.50865  2.86761  3.57345  2.54230  2.72096  4.01037  2.47449  1.93180  2.93033  2.96460  2.77757  2.98061  3.25532  5.36764  4.01344    284 p - - -
          2.68618  4.42225  2.77519  2.73123  3.46354  2.40513  3.72494  3.29354  2.67741  2.69355  4.24690  2.90347  2.73739  3.18146  2.89801  2.37887  2.77519  2.98518  4.58477  3.61503
          0.01910  4.36335  5.08570  0.61958  0.77255  0.48576  0.95510
    247   3.12049  4.45399  4.87703  4.35601  3.75359  4.43963  4.99517  1.25483  4.25055  2.40377  3.58969  4.53549  4.78182  4.50141  4.43375  3.80403  2.39697  1.22922  5.56830  4.36315    285 v - - -
          2.68618  4.42225  2.77519  2.73123  3.46354  2.40513  3.72494  3.29354  2.67741  2.69355  4.24690  2.90347  2.73739  3.18146  2.89801  2.37887  2.77519  2.98518  4.58477  3.61503
          0.01910  4.36335  5.08570  0.61958  0.77255  0.48576  0.95510
    248   1.78742  4.40937  3.73359  3.59257  4.77675  0.80712  4.69054  4.18389  3.76072  3.91028  4.74504  3.65163  3.95966  4.00315  4.01799  2.66842  3.01231  3.54723  6.09356  4.93868    286 g - - -
          2.68618  4.42225  2.77519  2.73123  3.46354  2.40513  3.72494  3.29354  2.67741  2.69355  4.24690  2.90347  2.73739  3.18146  2.89801  2.37887  2.77519  2.98518  4.58477  3.61503
          0.01910  4.36335  5.08570  0.61958  0.77255  0.48576  0.95510
    249   2.96632  4.67103  3.88527  3.49139  3.68124  3.77243  4.37792  2.97619  3.35847  1.44081  3.69491  3.80478  1.38137  3.74091  3.62480  3.21138  3.29482  2.86935  5.31938  4.06563    287 p - - -
          2.68618  4.42225  2.77519  2.73123  3.46354  2.40513  3.72494  3.29354  2.67741  2.69355  4.24690  2.90347  2.73739  3.18146  2.89801  2.37887  2.77519  2.98518  4.58477  3.61503
          0.01910  4.36335  5.08570  0.61958  0.77255  0.48576  0.95510
    250   3.70036  4.98546  5.29924  4.75318  3.18750  4.95465  5.23269  2.39099  4.54244  0.59537  2.39623  5.01552  5.06516  4.60898  4.60676  4.34865  3.91670  2.61364  5.37961  4.34597    288 L - - -
          2.68618  4.42225  2.77519  2.73123  3.46354  2.40513  3.72494  3.29354  2.67741  2.69355  4.24690  2.90347  2.73739  3.18146  2.89801  2.37887  2.77519  2.98518  4.58477  3.61503
          0.01910  4.36335  5.08570  0.61958  0.77255  0.48576  0.95510
    251   2.27008  4.29404  3.73688  3.17600  2.89332  3.65728  3.99747  2.26745  3.11161  2.50421  3.42967  3.51689  2.27938  3.39423  3.41749  2.93432  2.38503  2.51905  4.93580  3.71766    289 i - - -
          2.68618  4.42225  2.77519  2.73123  3.46354  2.40513  3.72494  3.29354  2.67741  2.69355  4.24690  2.90347  2.73739  3.18146  2.89801  2.37887  2.77519  2.98518  4.58477  3.61503
          0.01910  4.36335  5.08570  0.61958  0.77255  0.48576  0.95510
    252   2.37570  4.64406  3.25766  2.74315  3.86311  3.54477  3.83529  3.22820  2.68029  2.06250  3.77104  3.20664  2.26802  2.45601  3.07187  2.81043  2.94361  2.96777  5.23558  3.96005    290 l - - -
          2.68618  4.42225  2.77519  2.73123  3.46354  2.40513  3.72494  3.29354  2.67741  2.69355  4.24690  2.90347  2.73739  3.18146  2.89801  2.37887  2.77519  2.98518  4.58477  3.61503
          0.01910  4.36335  5.08570  0.61958  0.77255  0.48576  0.95510
    253   2.66149  4.60251  3.24618  2.10529  2.95874  3.55119  3.79092  3.15613  2.68401  2.38872  3.69967  3.17591  3.94497  3.01745  3.10239  2.16367  2.56083  2.89572  5.15667  3.87524    291 e - - -
          2.68614  4.42251  2.77545  2.73118  3.46380  2.40539  3.72520  3.29253  2.67737  2.69365  4.24528  2.90335  2.73749  3.18108  2.89777  2.37902  2.77545  2.98544  4.58503  3.61453
          0.68917  1.28349  1.50988  1.37671  0.29090  0.48576  0.95510
    254   2.80041  5.28250  1.90765  1.86828  4.60359  3.31719  3.71408  4.08937  2.59550  3.59843  4.39508  2.79423  2.40779  2.85228  3.13052  2.42536  3.06251  3.67294  5.76448  4.32237    298 e - - -
          2.68618  4.42225  2.77519  2.73123  3.46354  2.40513  3.72494  3.29354  2.67741  2.69355  4.24690  2.90347  2.73739  3.18146  2.89801  2.37887  2.77519  2.98518  4.58477  3.61503
          0.02439  4.12160  4.84395  0.61958  0.77255  0.34448  1.23302
    255   2.65294  4.52557  2.48877  2.76461  3.25440  3.57437  3.81005  2.58141  2.73850  2.74631  3.02803  3.22379  2.95199  3.06258  3.14314  2.37595  2.88525  2.62701  5.08841  3.82416    299 s - - -
          2.68618  4.42225  2.77519  2.73123  3.46354  2.40513  3.72494  3.29354  2.67741  2.69355  4.24690  2.90347  2.73739  3.18146  2.89801  2.37887  2.77519  2.98518  4.58477  3.61503
          0.01910  4.36335  5.08570  0.61958  0.77255  0.48576  0.95510
    256   2.78979  5.22845  2.18816  1.94669  4.56431  3.42461  3.74768  4.03582  2.57007  3.55350  4.33323  2.91555  3.90152  2.87398  3.08004  1.96340  2.16067  3.62545  5.72073  4.30692    300 e - - -
          2.68618  4.42225  2.77519  2.73123  3.46354  2.40513  3.72494  3.29354  2.67741  2.69355  4.24690  2.90347  2.73739  3.18146  2.89801  2.37887  2.77519  2.98518  4.58477  3.61503
          0.01910  4.36335  5.08570  0.61958  0.77255  0.48576  0.95510
    257   2.69010  4.99607  2.40061  2.07271  3.04333  3.45987  3.69284  3.70648  2.48580  3.27602  4.07051  2.96847  3.87412  2.82658  2.96650  2.14151  2.44906  3.34991  5.48577  4.12054    301 e - - -
          2.68618  4.42225  2.77519  2.73123  3.46354  2.40513  3.72494  3.29354  2.67741  2.69355  4.24690  2.90347  2.73739  3.18146  2.89801  2.37887  2.77519  2.98518  4.58477  3.61503
          0.01910  4.36335  5.08570  0.61958  0.77255  0.48576  0.95510
    258   2.40746  5.03378  2.95666  2.19120  4.34863  3.07793  3.67461  3.79402  1.76833  3.33700  4.11622  2.96484  3.86536  2.79604  2.89287  2.29146  2.91922  3.06792  5.52049  4.15099    302 k - - -
          2.68618  4.42225  2.77519  2.73123  3.46354  2.40513  3.72494  3.29354  2.67741  2.69355  4.24690  2.90347  2.73739  3.18146  2.89801  2.37887  2.77519  2.98518  4.58477  3.61503
          0.01910  4.36335  5.08570  0.61958  0.77255  0.48576  0.95510
    259   2.86316  5.40985  1.96446  1.58753  4.72832  2.94847  3.76415  4.22806  2.60770  3.70542  4.47810  2.87797  3.04375  2.36071  3.13901  2.79230  3.11392  3.79011  5.84623  4.39605    303 e - - -
          2.68618  4.42225  2.77519  2.73123  3.46354  2.40513  3.72494  3.29354  2.67741  2.69355  4.24690  2.90347  2.73739  3.18146  2.89801  2.37887  2.77519  2.98518  4.58477  3.61503
          0.01910  4.36335  5.08570  0.61958  0.77255  0.48576  0.95510
    260   2.68473  5.01626  2.24739  2.43189  4.29499  3.46717  3.67309  2.95790  1.93197  2.85936  4.07837  2.56966  3.86840  2.79920  2.90760  2.68242  2.91681  3.36516  5.48896  4.12248    304 k - - -
          2.68618  4.42225  2.77519  2.73123  3.46354  2.40513  3.72494  3.29354  2.67741  2.69355  4.24690  2.90347  2.73739  3.18146  2.89801  2.37887  2.77519  2.98518  4.58477  3.61503
          0.01910  4.36335  5.08570  0.61958  0.77255  0.48576  0.95510
    261   2.99538  5.58113  1.68698  1.50418  4.88993  3.40877  3.85559  4.40659  2.78545  3.88039  4.68145  2.57408  3.97263  2.99675  3.35479  2.09481  3.26377  3.96209  6.02693  4.53976    305 e - - -
          2.68618  4.42225  2.77519  2.73123  3.46354  2.40513  3.72494  3.29354  2.67741  2.69355  4.24690  2.90347  2.73739  3.18146  2.89801  2.37887  2.77519  2.98518  4.58477  3.61503
          0.01910  4.36335  5.08570  0.61958  0.77255  0.48576  0.95510
    262   2.66181  4.91939  3.00758  2.25878  4.19003  2.95554  3.68744  3.61781  2.47487  3.20102  3.00623  2.55619  2.86316  2.82609  2.94480  2.49423  2.43998  3.27344  5.42449  4.07515    306 e - - -
          2.68618  4.42225  2.77519  2.73123  3.46354  2.40513  3.72494  3.29354  2.67741  2.69355  4.24690  2.90347  2.73739  3.18146  2.89801  2.37887  2.77519  2.98518  4.58477  3.61503
          0.01910  4.36335  5.08570  0.61958  0.77255  0.48576  0.95510
    263   2.69170  5.15560  2.38970  2.37805  4.48851  3.44726  3.64631  3.96015  2.07953  3.45391  4.20695  2.68869  3.85103  2.75155  2.21640  2.32511  2.59241  3.54128  5.59629  4.19962    307 k - - -
          2.68636  4.42073  2.77468  2.73142  3.46372  2.40531  3.72513  3.29317  2.67759  2.69373  4.24708  2.90291  2.73726  3.18165  2.89819  2.37861  2.77538  2.98537  4.58495  3.61522
          0.39633  1.55003  2.16307  1.29350  0.32063  0.48576  0.95510
    264   3.11395  4.75385  3.96722  3.57892  3.27109  3.78147  4.15442  3.48838  3.37837  3.04545  4.09085  3.84259  2.21687  3.78326  3.60798  3.31408  3.43070  3.27306  0.99102  3.30613    316 w - - -
          2.68624  4.42231  2.77525  2.73129  3.46360  2.40496  3.72500  3.29360  2.67717  2.69361  4.24696  2.90353  2.73746  3.18152  2.89807  2.37893  2.77525  2.98524  4.58483  3.61433
          0.22528  2.12653  2.49546  0.91912  0.50894  0.63616  0.75358
    265   2.59633  4.36412  3.40903  2.84834  3.51270  2.80452  2.84434  2.63469  2.79798  2.30762  3.47502  3.26868  3.93889  3.11667  3.16397  2.56068  2.83253  2.32275  4.94575  3.69955    320 l - - -
          2.68618  4.42225  2.77519  2.73123  3.46354  2.40513  3.72494  3.29354  2.67741  2.69355  4.24690  2.90347  2.73739  3.18146  2.89801  2.37887  2.77519  2.98518  4.58477  3.61503
          0.02323  4.16966  4.89201  0.61958  0.77255  0.71901  0.66793
    266   2.72357  5.17786  1.99328  2.29323  4.49808  2.57005  3.66010  3.97027  2.11552  3.47803  4.25426  2.84819  3.83247  2.52996  2.94993  2.68084  2.70402  3.56086  5.63673  4.22676    321 d - - -
          2.68618  4.42225  2.77519  2.73123  3.46354  2.40513  3.72494  3.29354  2.67741  2.69355  4.24690  2.90347  2.73739  3.18146  2.89801  2.37887  2.77519  2.98518  4.58477  3.61503
          0.02323  4.16966  4.89201  0.61958  0.77255  0.48490  0.95649
    267   3.00232  2.09894  4.81721  4.31955  3.61507  4.16847  4.84919  1.12244  4.15809  2.30988  3.51183  4.40718  4.60599  4.40020  4.29659  3.56980  3.30125  1.87675  5.39717  4.18659    322 i - - -
          2.68618  4.42225  2.77519  2.73123  3.46354  2.40513  3.72494  3.29354  2.67741  2.69355  4.24690  2.90347  2.73739  3.18146  2.89801  2.37887  2.77519  2.98518  4.58477  3.61503
          0.02049  4.29368  5.01602  0.61958  0.77255  0.43027  1.05078
    268   2.47568  4.58750  3.29080  2.72634  2.46667  3.56873  3.78792  3.14055  2.22753  2.81411  2.83338  2.78439  3.95318  3.01953  2.67763  2.79644  2.89845  2.88327  5.13420  3.86234    323 k - - -
          2.68618  4.42225  2.77519  2.73123  3.46354  2.40513  3.72494  3.29354  2.67741  2.69355  4.24690  2.90347  2.73739  3.18146  2.89801  2.37887  2.77519  2.98518  4.58477  3.61503
          0.01910  4.36335  5.08570  0.61958  0.77255  0.48576  0.95510
    269   2.30486  5.18296  2.23272  1.93963  4.50095  3.43571  3.06169  3.97537  2.44352  3.47753  4.23694  2.47414  3.86046  2.78246  2.94159  2.67998  2.95262  3.13322  5.63020  4.22290    324 e - - -
          2.68618  4.42225  2.77519  2.73123  3.46354  2.40513  3.72494  3.29354  2.67741  2.69355  4.24690  2.90347  2.73739  3.18146  2.89801  2.37887  2.77519  2.98518  4.58477  3.61503
          0.01910  4.36335  5.08570  0.61958  0.77255  0.48576  0.95510
    270   3.94485  5.15351  4.98294  4.69979  1.84627  4.63389  3.79083  3.56198  4.47956  2.81957  4.13636  4.40755  4.96675  4.46265  4.47773  4.08001  4.17958  3.53182  0.82318  2.19892    325 w - - -
          2.68618  4.42225  2.77519  2.73123  3.46354  2.40513  3.72494  3.29354  2.67741  2.69355  4.24690  2.90347  2.73739  3.18146  2.89801  2.37887  2.77519  2.98518  4.58477  3.61503
          0.01910  4.36335  5.08570  0.61958  0.77255  0.48576  0.95510
    271   3.69218  4.97523  5.30770  4.75515  3.18288  4.95311  5.22858  2.39270  4.55433  0.63775  2.17247  5.01494  5.05892  4.60665  4.61371  4.34132  3.90626  2.61914  5.37309  4.34944    326 L - - -
          2.68618  4.42225  2.77519  2.73123  3.46354  2.40513  3.72494  3.29354  2.67741  2.69355  4.24690  2.90347  2.73739  3.18146  2.89801  2.37887  2.77519  2.98518  4.58477  3.61503
          0.01910  4.36335  5.08570  0.61958  0.77255  0.48576  0.95510
    272   2.94306  5.47300  1.61729  1.93795  4.80976  2.48537  3.84041  4.31310  2.74926  3.80249  4.59908  2.88003  3.95784  2.97973  3.30394  1.96315  3.21226  3.87607  5.95694  4.49116    327 d - - -
          2.68618  4.42225  2.77519  2.73123  3.46354  2.40513  3.72494  3.29354  2.67741  2.69355  4.24690  2.90347  2.73739  3.18146  2.89801  2.37887  2.77519  2.98518  4.58477  3.61503
          0.01910  4.36335  5.08570  0.61958  0.77255  0.48576  0.95510
    273   2.53812  5.13028  2.95742  2.40822  4.46117  2.97026  3.64567  3.92228  1.95979  3.42291  4.18288  2.52062  3.86081  2.34202  2.50746  2.67140  2.54250  3.51504  5.56850  4.18737    328 k - - -
          2.68618  4.42225  2.77519  2.73123  3.46354  2.40513  3.72494  3.29354  2.67741  2.69355  4.24690  2.90347  2.73739  3.18146  2.89801  2.37887  2.77519  2.98518  4.58477  3.61503
          0.01910  4.36335  5.08570  0.61958  0.77255  0.48576  0.95510
    274   2.77596  5.10811  3.10732  2.52331  3.36320  3.54449  3.01098  3.86001  1.89070  3.37551  4.16556  3.03696  3.92646  2.09026  2.13595  2.76567  2.99327  3.49045  5.51962  4.18588    329 k - - -
          2.68618  4.42225  2.77519  2.73123  3.46354  2.40513  3.72494  3.29354  2.67741  2.69355  4.24690  2.90347  2.73739  3.18146  2.89801  2.37887  2.77519  2.98518  4.58477  3.61503
          0.01910  4.36335  5.08570  0.61958  0.77255  0.48576  0.95510
    275   2.44352  5.18770  2.82968  1.76712  4.51318  3.45263  3.68575  3.97931  2.27527  3.48302  4.25066  2.93106  3.88079  2.15486  2.90529  2.28248  2.97983  3.57115  5.63443  4.23996    330 e - - -
          2.68618  4.42225  2.77519  2.73123  3.46354  2.40513  3.72494  3.29354  2.67741  2.69355  4.24690  2.90347  2.73739  3.18146  2.89801  2.37887  2.77519  2.98518  4.58477  3.61503
          0.01910  4.36335  5.08570  0.61958  0.77255  0.48576  0.95510
    276   1.89453  4.72129  3.14401  2.68665  4.30533  2.91903  3.89204  3.73172  2.44390  3.33725  4.14585  3.14039  1.99207  3.05817  3.14994  2.27763  2.92715  3.32936  5.56565  4.25171    331 a - - -
          2.68618  4.42225  2.77519  2.73123  3.46354  2.40513  3.72494  3.29354  2.67741  2.69355  4.24690  2.90347  2.73739  3.18146  2.89801  2.37887  2.77519  2.98518  4.58477  3.61503
          0.01910  4.36335  5.08570  0.61958  0.77255  0.48576  0.95510
    277   2.30132  5.08643  2.96371  2.42448  4.42297  3.08003  3.66181  3.87794  2.00591  3.39506  4.16291  2.52012  3.86439  2.77479  2.38947  2.23979  2.92563  3.47969  5.55459  4.17971    332 k - - -
          2.68618  4.42225  2.77519  2.73123  3.46354  2.40513  3.72494  3.29354  2.67741  2.69355  4.24690  2.90347  2.73739  3.18146  2.89801  2.37887  2.77519  2.98518  4.58477  3.61503
          0.01910  4.36335  5.08570  0.61958  0.77255  0.48576  0.95510
    278   2.72222  4.75966  3.16941  2.90422  4.51463  3.36556  4.11393  3.97676  2.45669  3.59981  4.45292  3.29753  4.00483  3.31960  3.19552  0.90868  3.11340  3.53327  5.76220  4.47067    333 s - - -
          2.68618  4.42225  2.77519  2.73123  3.46354  2.40513  3.72494  3.29354  2.67741  2.69355  4.24690  2.90347  2.73739  3.18146  2.89801  2.37887  2.77519  2.98518  4.58477  3.61503
          0.01910  4.36335  5.08570  0.61958  0.77255  0.48576  0.95510
    279   3.22378  4.66284  4.78938  4.49343  3.96846  4.21648  5.23062  2.16204  4.37230  2.58416  3.88099  4.59974  4.76878  4.70830  4.53554  3.77232  3.58489  0.56877  5.82644  4.57977    334 V - - -
          2.68618  4.42225  2.77519  2.73123  3.46354  2.40513  3.72494  3.29354  2.67741  2.69355  4.24690  2.90347  2.73739  3.18146  2.89801  2.37887  2.77519  2.98518  4.58477  3.61503
          0.01910  4.36335  5.08570  0.61958  0.77255  0.48576  0.95510
    280   2.28527  4.43742  4.60904  4.09727  3.67427  4.18641  4.77254  2.05565  3.98114  1.96303  3.54231  4.29215  4.59630  4.24633  4.18557  3.55043  3.29440  1.03058  5.43439  4.23328    335 v - - -
          2.68618  4.42225  2.77519  2.73123  3.46354  2.40513  3.72494  3.29354  2.67741  2.69355  4.24690  2.90347  2.73739  3.18146  2.89801  2.37887  2.77519  2.98518  4.58477  3.61503
          0.01910  4.36335  5.08570  0.61958  0.77255  0.48576  0.95510
    281   4.21534  5.29129  5.11781  4.93466  1.38887  4.82077  3.64709  3.83394  4.74712  3.06548  4.39454  4.42749  5.10283  4.55226  4.65941  4.21858  4.42582  3.77891  3.74307  0.72773    336 y - - -
          2.68618  4.42225  2.77519  2.73123  3.46354  2.40513  3.72494  3.29354  2.67741  2.69355  4.24690  2.90347  2.73739  3.18146  2.89801  2.37887  2.77519  2.98518  4.58477  3.61503
          0.01910  4.36335  5.08570  0.61958  0.77255  0.48576  0.95510
    282   2.08027  3.12344  4.68641  4.13390  3.55303  4.13397  4.62754  1.45973  4.00651  2.40257  3.47186  4.25812  4.51444  4.21828  4.14696  3.47579  3.17801  1.47986  5.21151  4.01638    337 i - - -
          2.68618  4.42225  2.77519  2.73123  3.46354  2.40513  3.72494  3.29354  2.67741  2.69355  4.24690  2.90347  2.73739  3.18146  2.89801  2.37887  2.77519  2.98518  4.58477  3.61503
          0.01910  4.36335  5.08570  0.61958  0.77255  0.48576  0.95510
    283   1.60629  2.58280  4.00958  3.59405  4.35964  2.35559  4.48888  3.76474  3.54529  3.46423  4.29328  3.62085  3.89341  3.80387  3.82426  1.34030  2.86546  3.25200  5.74132  4.56113    338 s - - -
          2.68618  4.42225  2.77519  2.73123  3.46354  2.40513  3.72494  3.29354  2.67741  2.69355  4.24690  2.90347  2.73739  3.18146  2.89801  2.37887  2.77519  2.98518  4.58477  3.61503
          0.01910  4.36335  5.08570  0.61958  0.77255  0.48576  0.95510
    284   3.07618  4.55882  4.33593  3.84326  1.17422  4.07622  4.12897  2.75995  3.71818  1.91476  3.41844  4.01764  3.05588  3.92662  3.90237  3.41267  3.33010  2.69467  4.56076  3.05147    339 f - - -
          2.68618  4.42225  2.77519  2.73123  3.46354  2.40513  3.72494  3.29354  2.67741  2.69355  4.24690  2.90347  2.73739  3.18146  2.89801  2.37887  2.77519  2.98518  4.58477  3.61503
          0.01910  4.36335  5.08570  0.61958  0.77255  0.48576  0.95510
    285   3.39005  5.08808  4.16078  4.13376  5.21297  0.25932  5.19400  4.96129  4.37946  4.53998  5.53930  4.32774  4.49075  4.66558  4.53430  3.58001  3.90768  4.39414  6.14971  5.34091    340 G - - -
          2.68618  4.42225  2.77519  2.73123  3.46354  2.40513  3.72494  3.29354  2.67741  2.69355  4.24690  2.90347  2.73739  3.18146  2.89801  2.37887  2.77519  2.98518  4.58477  3.61503
          0.01910  4.36335  5.08570  0.61958  0.77255  0.48576  0.95510
    286   2.12936  4.36067  3.75082  3.40049  4.51571  3.15320  4.43467  3.89579  3.40889  3.60392  4.42503  3.53322  3.89833  3.69914  3.72525  1.09113  1.76180  3.35141  5.85687  4.65135    341 s - - -
          2.68618  4.42225  2.77519  2.73123  3.46354  2.40513  3.72494  3.29354  2.67741  2.69355  4.24690  2.90347  2.73739  3.18146  2.89801  2.37887  2.77519  2.98518  4.58477  3.61503
          0.01910  4.36335  5.08570  0.61958  0.77255  0.48576  0.95510
    287   2.69980  4.82326  3.09222  1.67308  4.03509  3.52473  3.74172  3.39978  2.54138  3.02874  2.99435  3.07609  3.92292  2.57954  2.97807  2.75427  2.93223  2.55081  5.34053  4.02507    342 e - - -
          2.68618  4.42225  2.77519  2.73123  3.46354  2.40513  3.72494  3.29354  2.67741  2.69355  4.24690  2.90347  2.73739  3.18146  2.89801  2.37887  2.77519  2.98518  4.58477  3.61503
          0.01910  4.36335  5.08570  0.61958  0.77255  0.48576  0.95510
    288   2.87698  4.25525  4.63977  4.04677  3.21261  4.06402  4.38867  2.00023  3.88539  1.68044  2.44438  4.15160  4.39165  4.03498  3.96649  3.37615  3.10763  1.69858  4.88762  2.66660    343 l - - -
          2.68618  4.42225  2.77519  2.73123  3.46354  2.40513  3.72494  3.29354  2.67741  2.69355  4.24690  2.90347  2.73739  3.18146  2.89801  2.37887  2.77519  2.98518  4.58477  3.61503
          0.01910  4.36335  5.08570  0.61958  0.77255  0.48576  0.95510
    289   2.66562  4.88346  3.05304  2.17902  3.04534  3.48956  3.68768  3.03092  2.11818  3.14342  3.95285  2.76732  3.87943  2.83355  2.51704  2.69431  2.57982  3.21940  5.37886  4.04208    344 k - - -
          2.68618  4.42225  2.77519  2.73123  3.46354  2.40513  3.72494  3.29354  2.67741  2.69355  4.24690  2.90347  2.73739  3.18146  2.89801  2.37887  2.77519  2.98518  4.58477  3.61503
          0.01910  4.36335  5.08570  0.61958  0.77255  0.48576  0.95510
    290   2.92238  4.37611  4.35300  3.77873  2.51823  4.04205  4.32136  2.17248  3.66208  1.42303  3.17220  4.01023  2.25546  3.86304  3.84408  3.34023  3.15376  2.42282  4.91398  3.70961    345 l - - -
          2.68618  4.42225  2.77519  2.73123  3.46354  2.40513  3.72494  3.29354  2.67741  2.69355  4.24690  2.90347  2.73739  3.18146  2.89801  2.37887  2.77519  2.98518  4.58477  3.61503
          0.01910  4.36335  5.08570  0.61958  0.77255  0.48576  0.95510
    291   2.73716  4.93756  2.85451  2.21657  4.49256  3.38029  3.91027  3.93813  2.75265  3.52002  4.33494  3.06491  2.65869  3.07308  3.20836  1.29289  3.05716  3.52445  5.72183  4.36937    346 s - - -
          2.68618  4.42225  2.77519  2.73123  3.46354  2.40513  3.72494  3.29354  2.67741  2.69355  4.24690  2.90347  2.73739  3.18146  2.89801  2.37887  2.77519  2.98518  4.58477  3.61503
          0.01910  4.36335  5.08570  0.61958  0.77255  0.48576  0.95510
    292   2.74384  5.24032  2.38127  2.35582  4.57422  3.44089  3.67750  4.05545  1.92085  3.53774  4.29295  2.54893  2.88148  2.13325  2.91778  2.69888  2.97980  3.62690  5.67313  4.26169    347 k - - -
          2.68618  4.42225  2.77519  2.73123  3.46354  2.40513  3.72494  3.29354  2.67741  2.69355  4.24690  2.90347  2.73739  3.18146  2.89801  2.37887  2.77519  2.98518  4.58477  3.61503
          0.01910  4.36335  5.08570  0.61958  0.77255  0.48576  0.95510
    293   3.13293  5.78521  1.38921  1.28633  5.06543  3.40607  3.93322  4.60601  2.94210  4.06622  4.90165  2.85134  4.02277  2.69615  3.54858  3.00263  3.41617  4.15282  6.21127  4.68029    348 e - - -
          2.68618  4.42225  2.77519  2.73123  3.46354  2.40513  3.72494  3.29354  2.67741  2.69355  4.24690  2.90347  2.73739  3.18146  2.89801  2.37887  2.77519  2.98518  4.58477  3.61503
          0.01910  4.36335  5.08570  0.61958  0.77255  0.48576  0.95510
    294   2.78305  5.28310  2.34739  1.60976  4.60242  3.43087  3.71212  4.08638  2.50859  3.57731  4.34208  2.64017  3.88828  2.14299  3.01602  2.73186  3.02488  3.14811  5.72327  4.29972    349 e - - -
          2.68618  4.42225  2.77519  2.73123  3.46354  2.40513  3.72494  3.29354  2.67741  2.69355  4.24690  2.90347  2.73739  3.18146  2.89801  2.37887  2.77519  2.98518  4.58477  3.61503
          0.01910  4.36335  5.08570  0.61958  0.77255  0.48576  0.95510
    295   3.48107  4.75382  5.29576  4.72812  2.25566  4.78454  5.02883  1.49360  4.58698  1.03895  3.03073  4.87992  4.94343  4.58941  4.61037  4.14236  3.69850  2.38098  5.22395  4.08249    350 l - - -
          2.68618  4.42225  2.77519  2.73123  3.46354  2.40513  3.72494  3.29354  2.67741  2.69355  4.24690  2.90347  2.73739  3.18146  2.89801  2.37887  2.77519  2.98518  4.58477  3.61503
          0.01910  4.36335  5.08570  0.61958  0.77255  0.48576  0.95510
    296   2.68743  5.02831  2.99140  2.44202  4.31870  3.47599  2.84965  3.75972  2.13173  3.30533  4.08832  2.54484  3.86967  2.27640  2.85245  2.68295  2.55954  2.73220  5.49103  4.12922    351 k - - -
          2.68618  4.42225  2.77519  2.73123  3.46354  2.40513  3.72494  3.29354  2.67741  2.69355  4.24690  2.90347  2.73739  3.18146  2.89801  2.37887  2.77519  2.98518  4.58477  3.61503
          0.01910  4.36335  5.08570  0.61958  0.77255  0.48576  0.95510
    297   2.20242  5.15038  2.66191  1.19350  4.64902  2.68040  3.90047  4.09574  2.77705  3.65922  4.47408  2.98809  3.95933  3.05542  3.27221  2.83064  3.14657  3.67579  5.84704  4.45152    352 e - - -
          2.68618  4.42225  2.77519  2.73123  3.46354  2.40513  3.72494  3.29354  2.67741  2.69355  4.24690  2.90347  2.73739  3.18146  2.89801  2.37887  2.77519  2.98518  4.58477  3.61503
          0.01910  4.36335  5.08570  0.61958  0.77255  0.48576  0.95510
    298   3.54937  4.80973  5.36078  4.78867  3.25139  4.89402  5.22009  1.49099  4.64973  0.96658  2.29271  4.99197  5.01750  4.65490  4.68455  4.26044  3.76528  2.34572  5.38911  4.37473    353 l - - -
          2.68618  4.42225  2.77519  2.73123  3.46354  2.40513  3.72494  3.29354  2.67741  2.69355  4.24690  2.90347  2.73739  3.18146  2.89801  2.37887  2.77519  2.98518  4.58477  3.61503
          0.01910  4.36335  5.08570  0.61958  0.77255  0.48576  0.95510
    299   0.71216  2.76139  4.34829  4.02842  4.34975  3.19065  4.74746  3.47406  3.91143  3.39540  4.32049  3.83859  3.97548  4.15420  4.07886  2.66445  2.94116  3.05678  5.80729  4.65411    354 a - - -
          2.68618  4.42225  2.77519  2.73123  3.46354  2.40513  3.72494  3.29354  2.67741  2.69355  4.24690  2.90347  2.73739  3.18146  2.89801  2.37887  2.77519  2.98518  4.58477  3.61503
          0.01910  4.36335  5.08570  0.61958  0.77255  0.48576  0.95510
    300   2.65889  4.61406  3.24251  2.68349  3.78642  3.55122  3.11437  3.17750  2.65318  2.24154  3.70377  2.91688  3.93732  2.50014  3.07218  2.35127  2.89019  2.49465  5.15444  3.41891    355 l - - -
          2.68618  4.42225  2.77519  2.73123  3.46354  2.40513  3.72494  3.29354  2.67741  2.69355  4.24690  2.90347  2.73739  3.18146  2.89801  2.37887  2.77519  2.98518  4.58477  3.61503
          0.01910  4.36335  5.08570  0.61958  0.77255  0.48576  0.95510
    301   3.39005  5.08808  4.16078  4.13376  5.21297  0.25932  5.19400  4.96129  4.37946  4.53998  5.53930  4.32774  4.49075  4.66558  4.53430  3.58001  3.90768  4.39414  6.14971  5.34091    356 G - - -
          2.68618  4.42225  2.77519  2.73123  3.46354  2.40513  3.72494  3.29354  2.67741  2.69355  4.24690  2.90347  2.73739  3.18146  2.89801  2.37887  2.77519  2.98518  4.58477  3.61503
          0.01910  4.36335  5.08570  0.61958  0.77255  0.48576  0.95510
    302   3.61770  4.87277  5.39866  4.82508  3.22507  4.96072  5.26662  1.76397  4.68460  0.77488  2.42223  5.05012  5.05562  4.67102  4.71545  4.33108  3.82919  2.42806  5.39878  4.40310    357 l - - -
          2.68618  4.42225  2.77519  2.73123  3.46354  2.40513  3.72494  3.29354  2.67741  2.69355  4.24690  2.90347  2.73739  3.18146  2.89801  2.37887  2.77519  2.98518  4.58477  3.61503
          0.01910  4.36335  5.08570  0.61958  0.77255  0.48576  0.95510
    303   2.84470  5.13726  2.92668  1.41213  4.41605  3.53213  3.74893  3.81873  2.08377  2.56819  4.20856  3.03381  3.96544  2.88743  2.82713  2.83524  3.07450  3.47918  5.58001  4.23806    358 e - - -
          2.68618  4.42225  2.77519  2.73123  3.46354  2.40513  3.72494  3.29354  2.67741  2.69355  4.24690  2.90347  2.73739  3.18146  2.89801  2.37887  2.77519  2.98518  4.58477  3.61503
          0.01910  4.36335  5.08570  0.61958  0.77255  0.48576  0.95510
    304   2.14560  4.34633  3.83621  3.37482  3.66099  3.52926  4.21048  2.88753  3.28925  1.29457  3.63431  3.62469  4.07959  3.59817  3.56228  2.24000  2.97504  2.66647  5.18017  3.96263    359 l - - -
          2.68618  4.42225  2.77519  2.73123  3.46354  2.40513  3.72494  3.29354  2.67741  2.69355  4.24690  2.90347  2.73739  3.18146  2.89801  2.37887  2.77519  2.98518  4.58477  3.61503
          0.01910  4.36335  5.08570  0.61958  0.77255  0.48576  0.95510
    305   1.88778  2.82370  4.00470  3.57286  4.27578  3.17095  4.45516  3.64095  3.51223  3.37040  4.21422  3.61983  3.90542  3.77778  3.79106  1.13499  2.30366  3.17428  5.67169  4.48730    360 s - - -
          2.68618  4.42225  2.77519  2.73123  3.46354  2.40513  3.72494  3.29354  2.67741  2.69355  4.24690  2.90347  2.73739  3.18146  2.89801  2.37887  2.77519  2.98518  4.58477  3.61503
          0.01910  4.36335  5.08570  0.61958  0.77255  0.48576  0.95510
    306   2.77111  5.21714  2.87449  2.06257  4.55648  2.18197  3.68335  4.01865  2.04854  3.50716  4.27537  2.47202  3.89783  2.79543  2.47740  2.73432  3.00149  3.60818  5.64199  4.26007    361 k - - -
          2.68618  4.42225  2.77519  2.73123  3.46354  2.40513  3.72494  3.29354  2.67741  2.69355  4.24690  2.90347  2.73739  3.18146  2.89801  2.37887  2.77519  2.98518  4.58477  3.61503
          0.01910  4.36335  5.08570  0.61958  0.77255  0.48576  0.95510
    307   3.02123  2.86386  4.81298  4.25755  3.44554  4.24329  4.70873  2.11796  4.10732  1.32278  3.33495  4.37608  4.59381  4.29265  4.22136  3.59081  3.27753  1.43313  5.21183  4.04087    362 l - - -
          2.68618  4.42225  2.77519  2.73123  3.46354  2.40513  3.72494  3.29354  2.67741  2.69355  4.24690  2.90347  2.73739  3.18146  2.89801  2.37887  2.77519  2.98518  4.58477  3.61503
          0.01910  4.36335  5.08570  0.61958  0.77255  0.48576  0.95510
    308   2.82933  4.87664  3.01649  2.87357  4.61756  3.38324  4.22753  4.18562  3.12339  3.79394  4.66179  2.18202  0.98673  3.45566  3.50450  2.91442  3.23966  3.71338  5.87885  4.56263    363 p - - -
          2.68618  4.42225  2.77519  2.73123  3.46354  2.40513  3.72494  3.29354  2.67741  2.69355  4.24690  2.90347  2.73739  3.18146  2.89801  2.37887  2.77519  2.98518  4.58477  3.61503
          0.01910  4.36335  5.08570  0.61958  0.77255  0.48576  0.95510
    309   3.01827  4.58295  4.31129  3.92235  0.99644  3.90769  4.21324  2.86808  3.81725  2.44584  3.64943  4.02688  4.42097  4.03954  3.99253  3.31901  2.38689  2.75261  4.65052  3.10525    364 f - - -
          2.68618  4.42225  2.77519  2.73123  3.46354  2.40513  3.72494  3.29354  2.67741  2.69355  4.24690  2.90347  2.73739  3.18146  2.89801  2.37887  2.77519  2.98518  4.58477  3.61503
          0.01910  4.36335  5.08570  0.61958  0.77255  0.48576  0.95510
    310   3.22149  4.52446  5.07183  4.50439  1.84320  4.51808  4.85049  1.52194  4.36197  1.66702  3.18533  4.62221  4.76935  4.46051  4.42395  3.86144  3.45244  1.73844  5.19843  4.02930    365 i - - -
          2.68618  4.42225  2.77519  2.73123  3.46354  2.40513  3.72494  3.29354  2.67741  2.69355  4.24690  2.90347  2.73739  3.18146  2.89801  2.37887  2.77519  2.98518  4.58477  3.61503
          0.01910  4.36335  5.08570  0.61958  0.77255  0.48576  0.95510
    311   3.59240  4.97235  4.68936  4.27765  2.63382  4.37475  4.06192  3.18408  3.91083  2.02814  3.81057  4.30254  4.75843  4.21484  4.02571  3.84959  3.84589  3.17161  0.87350  2.67529    366 w - - -
          2.68618  4.42225  2.77519  2.73123  3.46354  2.40513  3.72494  3.29354  2.67741  2.69355  4.24690  2.90347  2.73739  3.18146  2.89801  2.37887  2.77519  2.98518  4.58477  3.61503
          0.01910  4.36335  5.08570  0.61958  0.77255  0.48576  0.95510
    312   1.53385  4.31604  3.83047  3.34781  3.92091  3.34691  4.24532  3.14550  3.29740  2.97721  3.86988  3.55750  3.97318  3.58164  3.60568  2.11163  2.38064  1.85374  5.36290  4.15254    367 a - - -
          2.68618  4.42225  2.77519  2.73123  3.46354  2.40513  3.72494  3.29354  2.67741  2.69355  4.24690  2.90347  2.73739  3.18146  2.89801  2.37887  2.77519  2.98518  4.58477  3.61503
          0.01910  4.36335  5.08570  0.61958  0.77255  0.48576  0.95510
    313   3.44563  4.74921  5.15309  4.59598  1.85459  4.68236  4.84885  2.38034  4.45268  0.94543  3.04131  4.74325  4.87508  4.48189  4.50031  4.03284  3.66613  2.12298  5.07770  3.83728    368 l - - -
          2.68618  4.42225  2.77519  2.73123  3.46354  2.40513  3.72494  3.29354  2.67741  2.69355  4.24690  2.90347  2.73739  3.18146  2.89801  2.37887  2.77519  2.98518  4.58477  3.61503
          0.01910  4.36335  5.08570  0.61958  0.77255  0.48576  0.95510
    314   3.40657  5.48264  3.93927  3.12888  5.04412  3.96430  3.78727  4.33752  1.25825  3.70043  4.58433  3.47934  4.29891  2.91461  1.12167  3.38426  3.53050  4.02366  5.67179  4.57223    369 r - - -
          2.68618  4.42225  2.77519  2.73123  3.46354  2.40513  3.72494  3.29354  2.67741  2.69355  4.24690  2.90347  2.73739  3.18146  2.89801  2.37887  2.77519  2.98518  4.58477  3.61503
          0.01910  4.36335  5.08570  0.61958  0.77255  0.48576  0.95510
    315   2.70139  5.16010  2.64252  1.86690  4.47978  3.44169  3.65870  3.95086  2.07402  2.73526  4.21129  2.54970  3.17642  2.76774  2.90331  2.66882  2.93527  3.53771  5.60487  4.20412    370 e - - -
          2.68618  4.42225  2.77519  2.73123  3.46354  2.40513  3.72494  3.29354  2.67741  2.69355  4.24690  2.90347  2.73739  3.18146  2.89801  2.37887  2.77519  2.98518  4.58477  3.61503
          0.01910  4.36335  5.08570  0.61958  0.77255  0.48576  0.95510
    316   2.69731  5.01627  3.03311  2.46692  4.30458  3.49223  2.84382  3.73905  2.08431  2.79942  4.07609  2.99264  2.89835  2.41390  2.51201  2.69736  2.92393  3.04637  5.47517  4.12426    371 k - - -
          2.68618  4.42225  2.77519  2.73123  3.46354  2.40513  3.72494  3.29354  2.67741  2.69355  4.24690  2.90347  2.73739  3.18146  2.89801  2.37887  2.77519  2.98518  4.58477  3.61503
          0.01910  4.36335  5.08570  0.61958  0.77255  0.48576  0.95510
    317   2.67755  5.15018  2.49863  2.36766  4.48194  3.43986  3.63906  3.95689  2.05575  3.44980  4.19899  2.46726  2.94069  2.74259  2.57359  2.46811  2.59092  3.53463  5.59239  4.19091    372 k - - -
          2.68618  4.42225  2.77519  2.73123  3.46354  2.40513  3.72494  3.29354  2.67741  2.69355  4.24690  2.90347  2.73739  3.18146  2.89801  2.37887  2.77519  2.98518  4.58477  3.61503
          0.13340  4.36335  2.18793  0.61958  0.77255  0.48576  0.95510
    318   2.67651  5.17284  2.34996  2.09490  4.50772  2.90578  3.17070  3.98887  2.09161  3.47126  4.22020  2.64808  3.82096  2.72625  2.52449  2.63560  2.91028  3.55881  5.60623  4.19662    373 k - - -
          2.68618  4.42225  2.77519  2.73123  3.46354  2.40513  3.72494  3.29354  2.67741  2.69355  4.24690  2.90347  2.73739  3.18146  2.89801  2.37887  2.77519  2.98518  4.58477  3.61503
          0.02139  4.25134  4.97369  0.61958  0.77255  0.63253  0.75768
    319   2.34405  5.06119  2.71619  1.97953  4.46514  2.24660  3.74048  3.92524  2.56619  3.46615  4.25573  2.37339  3.86200  2.87617  3.06102  2.35138  2.98442  3.51875  5.64977  4.25928    374 e - - -
          2.68639  4.42246  2.77459  2.73082  3.46375  2.40523  3.72516  3.29375  2.67698  2.69376  4.24545  2.90368  2.73761  3.18168  2.89822  2.37881  2.77541  2.98499  4.58498  3.61524
          0.89942  0.99646  1.49605  1.06021  0.42524  0.63253  0.75768
    320   2.61097  4.75822  2.72983  1.97923  4.21654  2.75090  3.75521  3.60906  2.59956  3.24084  4.07894  2.93570  3.80873  2.93155  3.03951  2.65642  1.89929  3.24788  5.48242  4.15015    381 t - - -
          2.68618  4.42225  2.77519  2.73123  3.46354  2.40513  3.72494  3.29354  2.67741  2.69355  4.24690  2.90347  2.73739  3.18146  2.89801  2.37887  2.77519  2.98518  4.58477  3.61503
          0.02740  4.00660  4.72895  0.61958  0.77255  0.85569  0.55336
    321   2.58922  4.45619  2.84693  2.68551  3.58835  3.49150  2.84126  2.36459  2.66412  2.65634  3.55341  3.14415  3.88792  2.99753  3.06110  2.74061  2.82539  2.37370  5.00651  3.72175    382 i - - -
          2.68618  4.42225  2.77519  2.73123  3.46354  2.40513  3.72494  3.29354  2.67741  2.69355  4.24690  2.90347  2.73739  3.18146  2.89801  2.37887  2.77519  2.98518  4.58477  3.61503
          0.02740  4.00660  4.72895  0.61958  0.77255  0.30897  1.32503
    322   2.66390  4.82025  3.07846  2.19083  4.05512  3.49655  3.71171  3.46153  2.51825  3.07905  2.96378  3.04395  3.89158  2.56997  2.97090  1.94710  2.70502  2.91084  5.33723  4.01312    383 s - - -
          2.68618  4.42225  2.77519  2.73123  3.46354  2.40513  3.72494  3.29354  2.67741  2.69355  4.24690  2.90347  2.73739  3.18146  2.89801  2.37887  2.77519  2.98518  4.58477  3.61503
          0.01910  4.36335  5.08570  0.61958  0.77255  0.48576  0.95510
    323   2.67202  4.59910  2.70988  2.11937  3.77388  3.57666  3.80572  2.80755  2.69964  2.46267  3.05659  3.19565  3.96116  3.03119  3.11939  2.80081  2.90398  2.23531  5.16410  3.88748    384 e - - -
          2.68618  4.42225  2.77519  2.73123  3.46354  2.40513  3.72494  3.29354  2.67741  2.69355  4.24690  2.90347  2.73739  3.18146  2.89801  2.37887  2.77519  2.98518  4.58477  3.61503
          0.01910  4.36335  5.08570  0.61958  0.77255  0.48576  0.95510
    324   2.28814  4.82250  3.08272  2.15639  4.04980  2.99891  2.89090  3.46078  2.35037  2.70481  3.89716  3.04152  3.89005  2.86467  2.96005  2.70893  2.89439  3.14918  3.43760  4.00567    385 e - - -
          2.68618  4.42225  2.77519  2.73123  3.46354  2.40513  3.72494  3.29354  2.67741  2.69355  4.24690  2.90347  2.73739  3.18146  2.89801  2.37887  2.77519  2.98518  4.58477  3.61503
          0.01910  4.36335  5.08570  0.61958  0.77255  0.48576  0.95510
    325   2.85579  4.50912  4.00497  3.60977  3.51535  3.73644  4.37107  2.79745  3.45614  0.95221  3.55474  3.84234  4.27321  3.80750  3.68196  2.35355  3.19253  2.68150  5.18389  3.90867    386 l - - -
          2.68618  4.42225  2.77519  2.73123  3.46354  2.40513  3.72494  3.29354  2.67741  2.69355  4.24690  2.90347  2.73739  3.18146  2.89801  2.37887  2.77519  2.98518  4.58477  3.61503
          0.01910  4.36335  5.08570  0.61958  0.77255  0.48576  0.95510
    326   3.00197  4.96291  3.51350  3.13008  4.55947  3.60594  4.15953  4.05020  2.74335  3.61262  4.51501  3.51326  0.92889  3.36845  2.14160  3.09875  3.33972  3.67877  5.70569  4.50655    387 p - - -
          2.68618  4.42225  2.77519  2.73123  3.46354  2.40513  3.72494  3.29354  2.67741  2.69355  4.24690  2.90347  2.73739  3.18146  2.89801  2.37887  2.77519  2.98518  4.58477  3.61503
          0.01910  4.36335  5.08570  0.61958  0.77255  0.48576  0.95510
    327   2.80776  5.34377  2.17222  1.98324  4.67421  3.42986  3.71931  4.16817  1.99915  3.63980  4.40006  2.23109  3.89583  2.30660  3.01846  2.74676  3.05030  3.72883  5.77117  4.33787    388 e - - -
          2.68618  4.42225  2.77519  2.73123  3.46354  2.40513  3.72494  3.29354  2.67741  2.69355  4.24690  2.90347  2.73739  3.18146  2.89801  2.37887  2.77519  2.98518  4.58477  3.61503
          0.01910  4.36335  5.08570  0.61958  0.77255  0.48576  0.95510
    328   3.39005  5.08808  4.16078  4.13376  5.21297  0.25932  5.19400  4.96129  4.37946  4.53998  5.53930  4.32774  4.49075  4.66558  4.53430  3.58001  3.90768  4.39414  6.14971  5.34091    389 G - - -
          2.68618  4.42225  2.77519  2.73123  3.46354  2.40513  3.72494  3.29354  2.67741  2.69355  4.24690  2.90347  2.73739  3.18146  2.89801  2.37887  2.77519  2.98518  4.58477  3.61503
          0.01910  4.36335  5.08570  0.61958  0.77255  0.48576  0.95510
    329   3.96006  5.22260  4.92461  4.75522  0.45805  4.48080  4.19943  3.45602  4.65883  2.72082  4.12450  4.61465  4.94542  4.69533  4.65531  4.18591  4.26999  3.47877  4.34738  2.67136    390 F - - -
          2.68618  4.42225  2.77519  2.73123  3.46354  2.40513  3.72494  3.29354  2.67741  2.69355  4.24690  2.90347  2.73739  3.18146  2.89801  2.37887  2.77519  2.98518  4.58477  3.61503
          0.01910  4.36335  5.08570  0.61958  0.77255  0.48576  0.95510
    330   2.29514  5.02774  2.98344  1.82047  4.31423  3.49580  3.69819  3.72839  1.94860  2.63536  4.09954  3.00327  3.90291  2.83012  2.85754  2.73352  2.96229  3.37734  5.49977  4.15126    391 e - - -
          2.68618  4.42225  2.77519  2.73123  3.46354  2.40513  3.72494  3.29354  2.67741  2.69355  4.24690  2.90347  2.73739  3.18146  2.89801  2.37887  2.77519  2.98518  4.58477  3.61503
          0.01910  4.36335  5.08570  0.61958  0.77255  0.48576  0.95510
    331   3.06696  5.67728  1.63480  1.19577  4.95445  3.41193  3.12693  4.49199  2.85682  3.96130  4.78032  2.86128  4.00073  3.04417  3.43732  2.95441  3.34080  4.04833  6.10101  4.59557    392 e - - -
          2.68618  4.42225  2.77519  2.73123  3.46354  2.40513  3.72494  3.29354  2.67741  2.69355  4.24690  2.90347  2.73739  3.18146  2.89801  2.37887  2.77519  2.98518  4.58477  3.61503
          0.01910  4.36335  5.08570  0.61958  0.77255  0.48576  0.95510
    332   2.87179  5.03590  3.25314  2.19600  4.31992  3.62867  3.74062  3.70161  2.29531  3.25655  2.93532  3.16014  4.01475  2.88685  1.44323  2.89656  3.08406  3.39338  5.46613  4.18849    393 r - - -
          2.68618  4.42225  2.77519  2.73123  3.46354  2.40513  3.72494  3.29354  2.67741  2.69355  4.24690  2.90347  2.73739  3.18146  2.89801  2.37887  2.77519  2.98518  4.58477  3.61503
          0.01910  4.36335  5.08570  0.61958  0.77255  0.48576  0.95510
    333   3.03151  4.41831  4.66511  4.13373  3.68694  4.26960  4.79109  1.44969  4.02799  2.40073  3.55170  4.33696  4.63935  4.28376  4.23029  3.61865  1.91714  1.38108  5.43372  4.23064    394 v - - -
          2.68618  4.42225  2.77519  2.73123  3.46354  2.40513  3.72494  3.29354  2.67741  2.69355  4.24690  2.90347  2.73739  3.18146  2.89801  2.37887  2.77519  2.98518  4.58477  3.61503
          0.01910  4.36335  5.08570  0.61958  0.77255  0.48576  0.95510
    334   2.86680  5.25568  3.05915  2.11281  4.63326  2.74992  3.69361  4.06478  1.49953  3.53065  4.31662  3.04738  3.96691  2.80686  2.16746  2.83377  3.08070  3.67010  5.63331  4.30817    395 k - - -
          2.68623  4.42230  2.77524  2.73128  3.46358  2.40517  3.72499  3.29359  2.67745  2.69359  4.24694  2.90308  2.73744  3.18151  2.89762  2.37891  2.77524  2.98523  4.58482  3.61508
          0.13663  2.10766  5.08570  0.66473  0.72240  0.48576  0.95510
    335   3.06220  5.68997  1.75065  1.32278  4.98750  2.84315  3.89343  4.51808  2.86601  3.98152  4.79601  2.16522  3.99580  3.04168  3.45885  2.94741  3.33797  4.06493  6.12608  4.61370    398 e - - -
          2.68618  4.42225  2.77519  2.73123  3.46354  2.40513  3.72494  3.29354  2.67741  2.69355  4.24690  2.90347  2.73739  3.18146  2.89801  2.37887  2.77519  2.98518  4.58477  3.61503
          0.01910  4.36335  5.08570  0.61958  0.77255  0.48576  0.95510
    336   3.14445  5.39318  3.55025  2.84655  4.86989  3.79815  3.09409  4.22284  1.47954  3.62076  4.45223  3.28006  4.14499  2.21958  1.46969  3.11317  3.30711  3.86730  5.64221  4.44638    399 r - - -
          2.68618  4.42225  2.77519  2.73123  3.46354  2.40513  3.72494  3.29354  2.67741  2.69355  4.24690  2.90347  2.73739  3.18146  2.89801  2.37887  2.77519  2.98518  4.58477  3.61503
          0.01910  4.36335  5.08570  0.61958  0.77255  0.48576  0.95510
    337   2.69575  4.53915  3.69310  3.35246  4.06536  0.97420  4.34255  3.39945  3.29938  3.08933  2.54636  3.61298  4.08644  3.66156  3.59129  2.89156  3.10363  3.10684  5.51951  4.27370    400 g - - -
          2.68618  4.42225  2.77519  2.73123  3.46354  2.40513  3.72494  3.29354  2.67741  2.69355  4.24690  2.90347  2.73739  3.18146  2.89801  2.37887  2.77519  2.98518  4.58477  3.61503
          0.01910  4.36335  5.08570  0.61958  0.77255  0.48576  0.95510
    338   3.17212  4.48607  5.05086  4.46554  2.47459  4.44216  4.78773  1.61841  4.30884  1.55022  2.32187  4.56639  4.69755  4.38845  4.34680  3.77798  3.39911  1.72594  5.14293  4.03613    401 l - - -
          2.68618  4.42225  2.77519  2.73123  3.46354  2.40513  3.72494  3.29354  2.67741  2.69355  4.24690  2.90347  2.73739  3.18146  2.89801  2.37887  2.77519  2.98518  4.58477  3.61503
          0.01910  4.36335  5.08570  0.61958  0.77255  0.48576  0.95510
    339   3.35155  4.59144  5.29682  4.82430  3.87863  4.85466  5.54254  1.15011  4.73801  2.33346  3.64118  4.99812  5.12099  4.99331  4.91138  4.27503  3.61696  0.96317  5.93517  4.72212    402 v - - -
          2.68618  4.42225  2.77519  2.73123  3.46354  2.40513  3.72494  3.29354  2.67741  2.69355  4.24690  2.90347  2.73739  3.18146  2.89801  2.37887  2.77519  2.98518  4.58477  3.61503
          0.01910  4.36335  5.08570  0.61958  0.77255  0.48576  0.95510
    340   2.94381  4.33907  4.58161  4.01315  3.19918  4.10791  4.37724  1.96363  3.84198  2.13933  3.28611  4.15020  4.44910  4.04289  3.96797  3.42796  3.18257  1.57311  1.92159  3.58887    403 v - - -
          2.68618  4.42225  2.77519  2.73123  3.46354  2.40513  3.72494  3.29354  2.67741  2.69355  4.24690  2.90347  2.73739  3.18146  2.89801  2.37887  2.77519  2.98518  4.58477  3.61503
          0.13340  4.36335  2.18793  0.61958  0.77255  0.48576  0.95510
    341   2.72928  5.04694  2.95671  2.46202  4.39195  2.87684  3.67327  3.82453  1.95704  3.35716  4.15126  2.98158  3.88369  1.99554  2.75309  2.72332  2.34685  3.45040  5.52407  4.18122    404 k - - -
          2.68618  4.42225  2.77519  2.73123  3.46354  2.40513  3.72494  3.29354  2.67741  2.69355  4.24690  2.90347  2.73739  3.18146  2.89801  2.37887  2.77519  2.98518  4.58477  3.61503
          0.02139  4.25134  4.97369  0.61958  0.77255  0.40384  1.10187
    342   2.73107  5.03248  2.82575  2.17562  4.43491  1.87529  3.78216  3.88366  2.59862  3.44080  4.23604  2.68837  2.78765  2.92192  3.08037  2.73339  2.48065  3.49078  5.63700  4.26347    405 g - - -
          2.68618  4.42225  2.77519  2.73123  3.46354  2.40513  3.72494  3.29354  2.67741  2.69355  4.24690  2.90347  2.73739  3.18146  2.89801  2.37887  2.77519  2.98518  4.58477  3.61503
          0.01910  4.36335  5.08570  0.61958  0.77255  0.48576  0.95510
    343   4.27407  5.44777  4.91508  4.76073  3.34365  4.34759  4.63893  4.35840  4.49769  3.65517  4.96216  4.82432  4.90928  4.85611  4.52893  4.47328  4.60536  4.25920  0.29347  3.32493    406 W - - -
          2.68618  4.42225  2.77519  2.73123  3.46354  2.40513  3.72494  3.29354  2.67741  2.69355  4.24690  2.90347  2.73739  3.18146  2.89801  2.37887  2.77519  2.98518  4.58477  3.61503
          0.01910  4.36335  5.08570  0.61958  0.77255  0.48576  0.95510
    344   1.24267  4.37231  4.24673  3.85212  3.98166  3.56101  4.66104  2.55235  3.77374  2.80880  3.88896  3.93325  4.21644  4.05561  4.00536  2.99413  3.09219  1.41171  5.60158  4.39694    407 a - - -
          2.68618  4.42225  2.77519  2.73123  3.46354  2.40513  3.72494  3.29354  2.67741  2.69355  4.24690  2.90347  2.73739  3.18146  2.89801  2.37887  2.77519  2.98518  4.58477  3.61503
          0.01910  4.36335  5.08570  0.61958  0.77255  0.48576  0.95510
    345   2.95981  4.98960  3.09940  2.89336  4.51204  3.50973  4.14877  4.05571  2.90170  3.61216  4.53426  3.33819  0.93150  2.51719  3.22771  3.03113  3.31532  3.68006  5.75594  4.46666    408 p - - -
          2.68618  4.42225  2.77519  2.73123  3.46354  2.40513  3.72494  3.29354  2.67741  2.69355  4.24690  2.90347  2.73739  3.18146  2.89801  2.37887  2.77519  2.98518  4.58477  3.61503
          0.01910  4.36335  5.08570  0.61958  0.77255  0.48576  0.95510
    346   3.39926  5.33439  3.35271  3.14630  4.56987  3.77901  4.29731  4.31230  2.93824  3.75942  4.80286  3.59936  4.35775  0.56312  3.19919  3.43995  3.70987  4.01828  5.76003  4.50544    409 Q - - -
          2.68618  4.42225  2.77519  2.73123  3.46354  2.40513  3.72494  3.29354  2.67741  2.69355  4.24690  2.90347  2.73739  3.18146  2.89801  2.37887  2.77519  2.98518  4.58477  3.61503
          0.01910  4.36335  5.08570  0.61958  0.77255  0.48576  0.95510
    347   2.25247  4.49618  3.37405  2.81565  3.67298  3.57670  3.83914  3.02375  2.77765  2.24863  3.60902  3.26043  2.90968  2.59512  3.16895  2.81692  2.54961  2.34529  5.08196  3.82551    410 l - - -
          2.68618  4.42225  2.77519  2.73123  3.46354  2.40513  3.72494  3.29354  2.67741  2.69355  4.24690  2.90347  2.73739  3.18146  2.89801  2.37887  2.77519  2.98518  4.58477  3.61503
          0.01910  4.36335  5.08570  0.61958  0.77255  0.48576  0.95510
    348   2.88016  5.09821  3.13189  2.16452  4.38649  3.60387  3.74234  3.76567  1.43871  2.30306  4.16605  3.11782  4.00529  2.88320  2.65614  2.88793  3.09560  3.44593  5.52030  4.22352    411 k - - -
          2.68618  4.42225  2.77519  2.73123  3.46354  2.40513  3.72494  3.29354  2.67741  2.69355  4.24690  2.90347  2.73739  3.18146  2.89801  2.37887  2.77519  2.98518  4.58477  3.61503
          0.01910  4.36335  5.08570  0.61958  0.77255  0.48576  0.95510
    349   3.46625  4.72435  5.25225  4.75314  3.51777  4.86246  5.32836  0.86337  4.59318  1.57570  3.31996  4.95899  5.07372  4.77793  4.71557  4.27188  3.71351  1.93338  5.61371  4.45633    412 i - - -
          2.68618  4.42225  2.77519  2.73123  3.46354  2.40513  3.72494  3.29354  2.67741  2.69355  4.24690  2.90347  2.73739  3.18146  2.89801  2.37887  2.77519  2.98518  4.58477  3.61503
          0.01910  4.36335  5.08570  0.61958  0.77255  0.48576  0.95510
    350   3.76010  5.09195  4.97961  4.64815  3.40497  4.60272  5.15614  2.65779  4.41525  0.44332  3.31993  4.87977  4.97026  4.65936  4.49981  4.27592  4.04041  2.81740  5.43203  4.26032    413 L - - -
          2.68618  4.42225  2.77519  2.73123  3.46354  2.40513  3.72494  3.29354  2.67741  2.69355  4.24690  2.90347  2.73739  3.18146  2.89801  2.37887  2.77519  2.98518  4.58477  3.61503
          0.01910  4.36335  5.08570  0.61958  0.77255  0.48576  0.95510
    351   2.03152  5.03610  3.10939  2.55276  4.40371  3.51813  3.70927  3.82715  1.79344  3.36336  4.15999  3.05741  3.92751  2.83674  2.26486  2.25103  2.99100  3.45704  5.52932  4.20504    414 k - - -
          2.68618  4.42225  2.77519  2.73123  3.46354  2.40513  3.72494  3.29354  2.67741  2.69355  4.24690  2.90347  2.73739  3.18146  2.89801  2.37887  2.77519  2.98518  4.58477  3.61503
          0.01910  4.36335  5.08570  0.61958  0.77255  0.48576  0.95510
    352   3.69829  5.37395  3.76562  3.60031  3.76695  3.97583  0.43258  4.48463  3.43754  3.90029  5.00402  3.97867  4.56653  3.98108  3.65906  3.77339  4.03000  4.21017  5.21494  3.70956    415 H - - -
          2.68618  4.42225  2.77519  2.73123  3.46354  2.40513  3.72494  3.29354  2.67741  2.69355  4.24690  2.90347  2.73739  3.18146  2.89801  2.37887  2.77519  2.98518  4.58477  3.61503
          0.01910  4.36335  5.08570  0.61958  0.77255  0.48576  0.95510
    353   2.82965  5.25121  2.68426  1.86309  4.58964  1.86173  3.76966  4.05804  2.57663  3.57511  4.36492  2.93193  3.05485  2.37475  3.06492  2.78949  3.08286  3.65374  5.74073  4.33554    416 g - - -
          2.68618  4.42225  2.77519  2.73123  3.46354  2.40513  3.72494  3.29354  2.67741  2.69355  4.24690  2.90347  2.73739  3.18146  2.89801  2.37887  2.77519  2.98518  4.58477  3.61503
          0.01910  4.36335  5.08570  0.61958  0.77255  0.48576  0.95510
    354   1.24505  4.33948  3.81626  3.54455  4.61579  3.12329  4.56591  4.01226  3.58716  3.73162  4.55354  3.59803  3.90425  3.85564  3.86845  1.15217  2.91628  3.41478  5.96479  4.77275    417 s - - -
          2.68618  4.42225  2.77519  2.73123  3.46354  2.40513  3.72494  3.29354  2.67741  2.69355  4.24690  2.90347  2.73739  3.18146  2.89801  2.37887  2.77519  2.98518  4.58477  3.61503
          0.01910  4.36335  5.08570  0.61958  0.77255  0.48576  0.95510
    355   3.29153  4.55955  5.17689  4.64315  3.60149  4.70372  5.18947  1.11832  4.53023  2.08091  2.42653  4.80757  4.94884  4.70095  4.65060  4.07457  3.53589  1.39197  5.57169  4.42647    418 i - - -
          2.68618  4.42225  2.77519  2.73123  3.46354  2.40513  3.72494  3.29354  2.67741  2.69355  4.24690  2.90347  2.73739  3.18146  2.89801  2.37887  2.77519  2.98518  4.58477  3.61503
          0.01910  4.36335  5.08570  0.61958  0.77255  0.48576  0.95510
    356   3.39005  5.08808  4.16078  4.13376  5.21297  0.25932  5.19400  4.96129  4.37946  4.53998  5.53930  4.32774  4.49075  4.66558  4.53430  3.58001  3.90768  4.39414  6.14971  5.34091    419 G - - -
          2.68618  4.42225  2.77519  2.73123  3.46354  2.40513  3.72494  3.29354  2.67741  2.69355  4.24690  2.90347  2.73739  3.18146  2.89801  2.37887  2.77519  2.98518  4.58477  3.61503
          0.01910  4.36335  5.08570  0.61958  0.77255  0.48576  0.95510
    357   2.46879  2.88227  4.14682  3.72734  4.03499  1.15712  4.49388  3.18770  3.63430  3.08716  4.00681  3.73851  3.99188  3.89438  3.86067  2.71701  2.92139  2.08968  5.50728  4.31933    420 g - - -
          2.68618  4.42225  2.77519  2.73123  3.46354  2.40513  3.72494  3.29354  2.67741  2.69355  4.24690  2.90347  2.73739  3.18146  2.89801  2.37887  2.77519  2.98518  4.58477  3.61503
          0.01910  4.36335  5.08570  0.61958  0.77255  0.48576  0.95510
    358   2.74821  2.65727  4.05552  3.54689  1.49350  3.71968  4.04340  2.82701  3.44381  2.55804  3.52340  2.62186  4.18091  3.68881  3.66297  3.05498  3.03293  2.62137  4.66475  3.23927    421 f - - -
          2.68618  4.42225  2.77519  2.73123  3.46354  2.40513  3.72494  3.29354  2.67741  2.69355  4.24690  2.90347  2.73739  3.18146  2.89801  2.37887  2.77519  2.98518  4.58477  3.61503
          0.01910  4.36335  5.08570  0.61958  0.77255  0.48576  0.95510
    359   3.35598  4.66077  5.10448  4.54043  3.32848  4.65753  5.02326  2.18071  4.40100  1.10295  2.46117  4.73362  4.87127  4.50524  4.49267  4.00900  3.58535  1.42209  5.34771  4.26814    422 l - - -
          2.68618  4.42225  2.77519  2.73123  3.46354  2.40513  3.72494  3.29354  2.67741  2.69355  4.24690  2.90347  2.73739  3.18146  2.89801  2.37887  2.77519  2.98518  4.58477  3.61503
          0.01910  4.36335  5.08570  0.61958  0.77255  0.48576  0.95510
    360   2.54312  4.56594  3.29291  2.93827  4.40679  3.26706  4.12487  3.83081  3.00790  3.47564  4.29635  2.60027  3.91360  3.33212  3.40136  1.75544  1.37446  3.36905  5.70676  4.42872    423 t - - -
          2.68618  4.42225  2.77519  2.73123  3.46354  2.40513  3.72494  3.29354  2.67741  2.69355  4.24690  2.90347  2.73739  3.18146  2.89801  2.37887  2.77519  2.98518  4.58477  3.61503
          0.01910  4.36335  5.08570  0.61958  0.77255  0.48576  0.95510
    361   3.69829  5.37395  3.76562  3.60031  3.76695  3.97583  0.43258  4.48463  3.43754  3.90029  5.00402  3.97867  4.56653  3.98108  3.65906  3.77339  4.03000  4.21017  5.21494  3.70956    424 H - - -
          2.68618  4.42225  2.77519  2.73123  3.46354  2.40513  3.72494  3.29354  2.67741  2.69355  4.24690  2.90347  2.73739  3.18146  2.89801  2.37887  2.77519  2.98518  4.58477  3.61503
          0.01910  4.36335  5.08570  0.61958  0.77255  0.48576  0.95510
    362   3.28118  0.32593  4.86206  4.73154  4.65379  3.77469  5.27660  3.91713  4.57810  3.79100  4.93645  4.59911  4.51368  4.90334  4.60453  3.55000  3.78955  3.61839  5.92490  4.92935    425 C - - -
          2.68618  4.42225  2.77519  2.73123  3.46354  2.40513  3.72494  3.29354  2.67741  2.69355  4.24690  2.90347  2.73739  3.18146  2.89801  2.37887  2.77519  2.98518  4.58477  3.61503
          0.01910  4.36335  5.08570  0.61958  0.77255  0.48576  0.95510
    363   3.39005  5.08808  4.16078  4.13376  5.21297  0.25932  5.19400  4.96129  4.37946  4.53998  5.53930  4.32774  4.49075  4.66558  4.53430  3.58001  3.90768  4.39414  6.14971  5.34091    426 G - - -
          2.68618  4.42225  2.77519  2.73123  3.46354  2.40513  3.72494  3.29354  2.67741  2.69355  4.24690  2.90347  2.73739  3.18146  2.89801  2.37887  2.77519  2.98518  4.58477  3.61503
          0.01910  4.36335  5.08570  0.61958  0.77255  0.48576  0.95510
    364   2.67887  4.48167  3.60638  3.14991  3.55346  3.51085  4.02353  3.25224  3.04854  2.92628  3.83489  3.47131  2.97886  3.40941  3.36003  2.13931  3.00623  2.97262  1.52211  3.65038    427 w - - -
          2.68618  4.42225  2.77519  2.73123  3.46354  2.40513  3.72494  3.29354  2.67741  2.69355  4.24690  2.90347  2.73739  3.18146  2.89801  2.37887  2.77519  2.98518  4.58477  3.61503
          0.01910  4.36335  5.08570  0.61958  0.77255  0.48576  0.95510
    365   2.65795  4.75923  2.93094  2.76537  4.71028  1.33084  4.16164  4.20256  3.09688  3.79372  4.60605  1.81483  3.94658  3.35835  3.53570  2.37000  3.08123  3.65998  5.96399  4.63110    428 g - - -
          2.68618  4.42225  2.77519  2.73123  3.46354  2.40513  3.72494  3.29354  2.67741  2.69355  4.24690  2.90347  2.73739  3.18146  2.89801  2.37887  2.77519  2.98518  4.58477  3.61503
          0.01910  4.36335  5.08570  0.61958  0.77255  0.48576  0.95510
    366   2.44088  4.38463  3.70994  3.46437  4.60581  3.15010  4.52543  4.00536  3.50420  3.72692  4.56500  3.56963  3.92313  3.80751  3.78865  0.77286  2.30260  3.42889  5.95248  4.73830    429 s - - -
          2.68618  4.42225  2.77519  2.73123  3.46354  2.40513  3.72494  3.29354  2.67741  2.69355  4.24690  2.90347  2.73739  3.18146  2.89801  2.37887  2.77519  2.98518  4.58477  3.61503
          0.01910  4.36335  5.08570  0.61958  0.77255  0.48576  0.95510
    367   2.54000  4.42616  4.90115  4.35801  3.65043  4.44491  4.91605  1.39644  4.24618  2.31843  2.96288  4.52344  4.75544  4.46497  4.39994  3.79311  3.35793  1.16190  5.44433  4.25396    430 v - - -
          2.68618  4.42225  2.77519  2.73123  3.46354  2.40513  3.72494  3.29354  2.67741  2.69355  4.24690  2.90347  2.73739  3.18146  2.89801  2.37887  2.77519  2.98518  4.58477  3.61503
          0.01910  4.36335  5.08570  0.61958  0.77255  0.48576  0.95510
    368   2.95976  4.31898  4.76079  4.17113  3.22416  4.16841  4.49132  1.73512  4.00313  1.47645  3.15757  4.26701  4.48098  4.14128  4.07205  3.48784  3.19043  1.66496  3.30310  3.78118    431 l - - -
          2.68618  4.42225  2.77519  2.73123  3.46354  2.40513  3.72494  3.29354  2.67741  2.69355  4.24690  2.90347  2.73739  3.18146  2.89801  2.37887  2.77519  2.98518  4.58477  3.61503
          0.01910  4.36335  5.08570  0.61958  0.77255  0.48576  0.95510
    369   3.48853  5.61343  2.82691  0.48768  5.03948  3.67575  4.34452  4.60299  3.29890  4.14951  5.13360  3.34563  4.31263  3.56966  3.73840  3.43635  3.80653  4.24596  6.11104  4.87655    432 E - - -
          2.68618  4.42225  2.77519  2.73123  3.46354  2.40513  3.72494  3.29354  2.67741  2.69355  4.24690  2.90347  2.73739  3.18146  2.89801  2.37887  2.77519  2.98518  4.58477  3.61503
          0.01910  4.36335  5.08570  0.61958  0.77255  0.48576  0.95510
    370   2.66537  4.79885  3.05688  2.70740  4.49859  2.07923  3.96211  3.94109  2.27128  3.52546  4.33486  3.15698  3.93145  3.12909  3.15648  1.40751  3.01543  3.49703  5.71691  4.40096    433 s - - -
          2.68618  4.42225  2.77519  2.73123  3.46354  2.40513  3.72494  3.29354  2.67741  2.69355  4.24690  2.90347  2.73739  3.18146  2.89801  2.37887  2.77519  2.98518  4.58477  3.61503
          0.01910  4.36335  5.08570  0.61958  0.77255  0.48576  0.95510
    371   3.42542  4.72742  5.15577  4.58557  3.26692  4.71553  5.05418  2.25511  4.44349  0.93882  2.24572  4.79014  4.90108  4.51438  4.51979  4.06764  3.64876  1.73604  5.33057  4.28004    434 l - - -
          2.68618  4.42225  2.77519  2.73123  3.46354  2.40513  3.72494  3.29354  2.67741  2.69355  4.24690  2.90347  2.73739  3.18146  2.89801  2.37887  2.77519  2.98518  4.58477  3.61503
          0.01910  4.36335  5.08570  0.61958  0.77255  0.48576  0.95510
    372   2.31419  4.58421  3.26731  2.71285  3.75854  3.55522  3.06401  3.14406  2.68402  2.81859  3.68191  3.18387  3.94514  2.75806  3.09685  2.15315  2.89111  2.20763  5.13669  3.35863    435 s - - -
          2.68618  4.42225  2.77519  2.73123  3.46354  2.40513  3.72494  3.29354  2.67741  2.69355  4.24690  2.90347  2.73739  3.18146  2.89801  2.37887  2.77519  2.98518  4.58477  3.61503
          0.01910  4.36335  5.08570  0.61958  0.77255  0.48576  0.95510
    373   2.23402  4.18489  4.03213  3.46145  1.90661  3.74004  4.03577  2.62477  3.35690  2.37504  3.30733  3.69649  4.12558  3.59211  3.56908  2.62497  2.91227  2.10665  4.73846  3.04184    436 f - - -
          2.68618  4.42225  2.77519  2.73123  3.46354  2.40513  3.72494  3.29354  2.67741  2.69355  4.24690  2.90347  2.73739  3.18146  2.89801  2.37887  2.77519  2.98518  4.58477  3.61503
          0.01910  4.36335  5.08570  0.61958  0.77255  0.48576  0.95510
    374   3.06767  5.17933  2.15248  2.74663  4.97755  0.74845  4.32328  4.54068  3.40024  4.11673  4.99776  3.25384  4.14338  3.55017  3.90346  3.09550  3.47324  4.04114  6.14363  4.85461    437 g - - -
          2.68618  4.42225  2.77519  2.73123  3.46354  2.40513  3.72494  3.29354  2.67741  2.69355  4.24690  2.90347  2.73739  3.18146  2.89801  2.37887  2.77519  2.98518  4.58477  3.61503
          0.01910  4.36335  5.08570  0.61958  0.77255  0.48576  0.95510
    375   2.68848  2.79641  4.03684  3.48661  3.37662  3.71127  2.71607  2.61230  3.34097  2.47039  3.42337  3.71983  4.14751  3.62856  3.56499  3.03017  2.95815  1.41147  4.90043  3.66050    438 v - - -
          2.68618  4.42225  2.77519  2.73123  3.46354  2.40513  3.72494  3.29354  2.67741  2.69355  4.24690  2.90347  2.73739  3.18146  2.89801  2.37887  2.77519  2.98518  4.58477  3.61503
          0.01910  4.36335  5.08570  0.61958  0.77255  0.48576  0.95510
    376   2.70860  4.64562  3.29754  2.86170  3.97859  3.50198  3.95889  3.30085  2.78836  2.99136  3.90998  3.28799  1.56622  2.64183  3.14872  2.84048  3.00825  2.26878  5.36079  4.08384    439 p - - -
          2.68618  4.42225  2.77519  2.73123  3.46354  2.40513  3.72494  3.29354  2.67741  2.69355  4.24690  2.90347  2.73739  3.18146  2.89801  2.37887  2.77519  2.98518  4.58477  3.61503
          0.01910  4.36335  5.08570  0.61958  0.77255  0.48576  0.95510
    377   3.58637  4.85051  5.36441  4.78649  3.21118  4.91167  5.21285  1.82881  4.64466  0.89633  1.90883  5.00212  5.01988  4.63354  4.67416  4.27577  3.79756  2.45693  5.36435  4.36497    440 l - - -
          2.68618  4.42225  2.77519  2.73123  3.46354  2.40513  3.72494  3.29354  2.67741  2.69355  4.24690  2.90347  2.73739  3.18146  2.89801  2.37887  2.77519  2.98518  4.58477  3.61503
          0.01910  4.36335  5.08570  0.61958  0.77255  0.48576  0.95510
    378   3.35816  4.60144  5.29081  4.81891  3.85289  4.84928  5.53170  0.92134  4.72776  2.29846  3.61717  4.99434  5.11635  4.97821  4.89806  4.27054  3.62400  1.21920  5.91664  4.70992    441 i - - -
          2.68618  4.42225  2.77519  2.73123  3.46354  2.40513  3.72494  3.29354  2.67741  2.69355  4.24690  2.90347  2.73739  3.18146  2.89801  2.37887  2.77519  2.98518  4.58477  3.61503
          0.01910  4.36335  5.08570  0.61958  0.77255  0.48576  0.95510
    379   2.65435  4.36166  3.64654  3.09895  3.54932  2.23842  3.98874  2.84339  3.02729  2.29235  2.40341  3.46111  4.04298  3.33793  3.35398  2.89706  2.13897  2.62639  5.02251  3.79733    442 t - - -
          2.68618  4.42225  2.77519  2.73123  3.46354  2.40513  3.72494  3.29354  2.67741  2.69355  4.24690  2.90347  2.73739  3.18146  2.89801  2.37887  2.77519  2.98518  4.58477  3.61503
          0.01910  4.36335  5.08570  0.61958  0.77255  0.48576  0.95510
    380   2.69398  4.12328  4.32690  3.73261  2.69121  3.82568  4.12753  2.25006  3.57971  1.75889  3.18244  3.87000  4.18547  3.76818  2.77089  3.12294  2.92529  2.00411  3.15988  3.51743    443 l - - -
          2.68618  4.42225  2.77519  2.73123  3.46354  2.40513  3.72494  3.29354  2.67741  2.69355  4.24690  2.90347  2.73739  3.18146  2.89801  2.37887  2.77519  2.98518  4.58477  3.61503
          0.01910  4.36335  5.08570  0.61958  0.77255  0.48576  0.95510
    381   3.53762  5.18155  4.19993  4.12730  5.03709  3.84295  5.13717  4.74490  4.23383  4.30089  5.38890  4.37312  0.27327  4.60465  4.39775  3.72611  4.02069  4.32673  6.05563  5.17247    444 P - - -
          2.68618  4.42225  2.77519  2.73123  3.46354  2.40513  3.72494  3.29354  2.67741  2.69355  4.24690  2.90347  2.73739  3.18146  2.89801  2.37887  2.77519  2.98518  4.58477  3.61503
          0.01910  4.36335  5.08570  0.61958  0.77255  0.48576  0.95510
    382   2.72329  3.14965  4.57667  3.97166  2.26778  3.88812  4.20305  2.07221  3.78270  1.86119  2.47757  4.01178  4.24012  3.92278  3.82636  3.19740  2.95435  2.30070  4.70128  2.83140    445 l - - -
          2.68618  4.42225  2.77519  2.73123  3.46354  2.40513  3.72494  3.29354  2.67741  2.69355  4.24690  2.90347  2.73739  3.18146  2.89801  2.37887  2.77519  2.98518  4.58477  3.61503
          0.01910  4.36335  5.08570  0.61958  0.77255  0.48576  0.95510
    383   2.24535  4.22194  3.97736  3.40249  2.65316  3.76453  4.05585  2.60801  3.30454  1.59087  2.91463  2.99041  4.13530  3.55356  3.54010  3.04412  2.92803  2.43235  4.81554  3.60649    446 l - - -
          2.68618  4.42225  2.77519  2.73123  3.46354  2.40513  3.72494  3.29354  2.67741  2.69355  4.24690  2.90347  2.73739  3.18146  2.89801  2.37887  2.77519  2.98518  4.58477  3.61503
          0.01910  4.36335  5.08570  0.61958  0.77255  0.48576  0.95510
    384   2.23131  4.32576  3.67752  3.12920  3.41363  3.64726  3.95592  2.81848  3.05928  1.91165  3.46010  3.48084  4.05464  3.35594  3.37037  2.19825  2.91357  2.60272  4.89699  2.49924    447 l - - -
          2.68618  4.42225  2.77519  2.73123  3.46354  2.40513  3.72494  3.29354  2.67741  2.69355  4.24690  2.90347  2.73739  3.18146  2.89801  2.37887  2.77519  2.98518  4.58477  3.61503
          0.01910  4.36335  5.08570  0.61958  0.77255  0.48576  0.95510
    385   3.28084  5.94368  0.84199  1.75558  5.22168  3.41425  4.04115  4.78731  3.16083  4.25813  5.15047  2.87051  4.08493  3.22214  3.82279  3.12451  3.58989  4.33264  6.39149  4.83141    448 d - - -
          2.68618  4.42225  2.77519  2.73123  3.46354  2.40513  3.72494  3.29354  2.67741  2.69355  4.24690  2.90347  2.73739  3.18146  2.89801  2.37887  2.77519  2.98518  4.58477  3.61503
          0.01910  4.36335  5.08570  0.61958  0.77255  0.48576  0.95510
    386   2.99525  5.31632  2.74276  2.51615  4.63902  3.50357  3.87546  4.19746  2.58654  3.70013  4.54197  1.88764  4.03721  1.32543  2.97107  2.96004  3.26442  3.80398  5.78379  4.39756    449 q - - -
          2.68618  4.42225  2.77519  2.73123  3.46354  2.40513  3.72494  3.29354  2.67741  2.69355  4.24690  2.90347  2.73739  3.18146  2.89801  2.37887  2.77519  2.98518  4.58477  3.61503
          0.01910  4.36335  5.08570  0.61958  0.77255  0.48576  0.95510
    387   2.31864  3.67586  3.52328  2.95853  2.82344  3.15625  3.88986  2.89643  2.91121  2.60952  3.49993  3.36123  2.57074  3.21637  2.62535  2.85825  2.88093  2.39369  4.97739  3.74182    450 a - - -
          2.68618  4.42225  2.77519  2.73123  3.46354  2.40513  3.72494  3.29354  2.67741  2.69355  4.24690  2.90347  2.73739  3.18146  2.89801  2.37887  2.77519  2.98518  4.58477  3.61503
          0.01910  4.36335  5.08570  0.61958  0.77255  0.48576  0.95510
    388   2.80395  4.37037  3.93819  3.41457  3.13363  3.80426  4.01726  2.76916  3.28803  1.32940  3.43263  3.69095  4.20138  3.57897  3.53274  2.40144  3.05103  2.60158  4.70960  2.58392    451 l - - -
          2.68618  4.42225  2.77519  2.73123  3.46354  2.40513  3.72494  3.29354  2.67741  2.69355  4.24690  2.90347  2.73739  3.18146  2.89801  2.37887  2.77519  2.98518  4.58477  3.61503
          0.01910  4.36335  5.08570  0.61958  0.77255  0.48576  0.95510
    389   2.66128  4.27098  3.74253  3.17213  2.49012  3.68896  3.95541  2.50739  3.10312  2.46277  3.37769  2.29488  4.06537  3.37989  3.39992  2.95139  2.45021  2.26056  4.84668  3.17590    452 v - - -
          2.68618  4.42225  2.77519  2.73123  3.46354  2.40513  3.72494  3.29354  2.67741  2.69355  4.24690  2.90347  2.73739  3.18146  2.89801  2.37887  2.77519  2.98518  4.58477  3.61503
          0.01910  4.36335  5.08570  0.61958  0.77255  0.48576  0.95510
    390   1.78284  4.81926  2.43160  2.59095  4.41074  2.53366  3.85494  3.85569  2.67996  3.43239  4.22246  3.07314  3.87924  3.00233  3.14848  2.11182  2.51050  3.42707  5.63515  4.28973    453 a - - -
          2.68618  4.42225  2.77519  2.73123  3.46354  2.40513  3.72494  3.29354  2.67741  2.69355  4.24690  2.90347  2.73739  3.18146  2.89801  2.37887  2.77519  2.98518  4.58477  3.61503
          0.01910  4.36335  5.08570  0.61958  0.77255  0.48576  0.95510
    391   3.41253  5.48055  3.94696  3.13751  5.04103  3.96723  3.79093  4.33496  1.36026  3.69976  4.58579  3.48546  4.30303  2.91920  1.03562  3.39172  3.53643  4.02296  5.67142  4.57360    454 r - - -
          2.68618  4.42225  2.77519  2.73123  3.46354  2.40513  3.72494  3.29354  2.67741  2.69355  4.24690  2.90347  2.73739  3.18146  2.89801  2.37887  2.77519  2.98518  4.58477  3.61503
          0.06894  4.36335  2.92102  0.61958  0.77255  0.48576  0.95510
    392   2.26864  4.40408  4.52166  3.99039  3.52006  4.12749  4.63110  2.12934  3.87020  1.49332  3.39759  4.19761  4.51494  4.11571  4.06599  3.47403  3.23893  1.38572  5.27234  4.09038    455 v - - -
          2.68618  4.42225  2.77519  2.73123  3.46354  2.40513  3.72494  3.29354  2.67741  2.69355  4.24690  2.90347  2.73739  3.18146  2.89801  2.37887  2.77519  2.98518  4.58477  3.61503
          0.02007  4.31448  5.03683  0.61958  0.77255  0.44506  1.02384
    393   3.27866  4.59634  5.06343  4.47997  2.74354  4.53749  4.85355  2.29661  4.33630  1.16749  2.25646  4.63031  4.76210  4.40099  4.39073  3.87360  3.50092  1.58068  5.17619  4.08707    456 l - - -
          2.68618  4.42225  2.77519  2.73123  3.46354  2.40513  3.72494  3.29354  2.67741  2.69355  4.24690  2.90347  2.73739  3.18146  2.89801  2.37887  2.77519  2.98518  4.58477  3.61503
          0.01910  4.36335  5.08570  0.61958  0.77255  0.48576  0.95510
    394   2.66171  4.73257  3.13860  1.92243  3.94035  3.51788  3.73532  3.33717  2.57024  2.97818  3.81714  3.08845  3.90919  2.69814  3.01095  2.45284  2.58483  2.38969  3.94230  3.95553    457 e - - -
          2.68618  4.42225  2.77519  2.73123  3.46354  2.40513  3.72494  3.29354  2.67741  2.69355  4.24690  2.90347  2.73739  3.18146  2.89801  2.37887  2.77519  2.98518  4.58477  3.61503
          0.01910  4.36335  5.08570  0.61958  0.77255  0.48576  0.95510
    395   2.72506  5.11519  2.18959  1.86271  4.42154  2.88785  3.70215  3.87227  2.49576  3.41333  4.19364  2.93473  3.87738  2.82603  2.99006  2.70426  2.49270  2.71838  5.59639  4.20591    458 e - - -
          2.68618  4.42225  2.77519  2.73123  3.46354  2.40513  3.72494  3.29354  2.67741  2.69355  4.24690  2.90347  2.73739  3.18146  2.89801  2.37887  2.77519  2.98518  4.58477  3.61503
          0.01910  4.36335  5.08570  0.61958  0.77255  0.48576  0.95510
    396   2.66746  4.76027  3.13438  2.34329  3.97300  3.51954  3.72694  3.36406  2.16091  2.55801  3.15566  2.38096  3.90796  2.90261  2.98110  2.73329  2.89802  2.55258  5.28107  3.97256    459 k - - -
          2.68622  4.42229  2.77523  2.73127  3.46311  2.40516  3.72498  3.29358  2.67744  2.69358  4.24693  2.90350  2.73743  3.18150  2.89804  2.37890  2.77523  2.98522  4.58254  3.61507
          0.21343  1.68199  5.08570  0.22280  1.61082  0.48576  0.95510
    397   2.84459  5.30091  2.73458  2.01012  4.64153  2.19248  3.74100  4.10988  1.72636  3.59946  4.38093  2.51291  3.93040  2.86331  2.93366  2.79589  3.08529  3.69736  5.73807  4.34134    461 k - - -
          2.68618  4.42225  2.77519  2.73123  3.46354  2.40513  3.72494  3.29354  2.67741  2.69355  4.24690  2.90347  2.73739  3.18146  2.89801  2.37887  2.77519  2.98518  4.58477  3.61503
          0.01910  4.36335  5.08570  0.61958  0.77255  0.48576  0.95510
    398   3.26775  4.54876  5.14006  4.58637  3.47602  4.63482  5.05857  1.63732  4.46324  1.66751  2.37500  4.73761  4.87457  4.59469  4.55531  3.99092  3.50413  1.21394  5.42426  4.30288    462 v - - -
          2.68618  4.42225  2.77519  2.73123  3.46354  2.40513  3.72494  3.29354  2.67741  2.69355  4.24690  2.90347  2.73739  3.18146  2.89801  2.37887  2.77519  2.98518  4.58477  3.61503
          0.01910  4.36335  5.08570  0.61958  0.77255  0.48576  0.95510
    399   1.53993  4.34078  3.75195  3.50702  4.69247  1.15554  4.57216  4.13398  3.61011  3.81077  4.60805  3.57360  3.89167  3.85352  3.90403  2.08593  2.91055  3.48208  6.02135  4.83766    463 g - - -
          2.68618  4.42225  2.77519  2.73123  3.46354  2.40513  3.72494  3.29354  2.67741  2.69355  4.24690  2.90347  2.73739  3.18146  2.89801  2.37887  2.77519  2.98518  4.58477  3.61503
          0.01910  4.36335  5.08570  0.61958  0.77255  0.48576  0.95510
    400   2.67848  4.39743  4.88533  4.32085  3.47366  4.37019  4.77349  1.45818  4.18883  1.88852  2.44886  4.45761  4.66957  4.36256  4.29952  3.70545  3.31157  1.46833  5.25493  4.09242    464 i - - -
          2.68618  4.42225  2.77519  2.73123  3.46354  2.40513  3.72494  3.29354  2.67741  2.69355  4.24690  2.90347  2.73739  3.18146  2.89801  2.37887  2.77519  2.98518  4.58477  3.61503
          0.01910  4.36335  5.08570  0.61958  0.77255  0.48576  0.95510
    401   2.68082  4.70999  3.15298  1.76142  3.92831  2.81957  3.78208  3.26485  2.63140  2.95108  2.87573  3.12735  3.93652  2.97651  3.06367  2.76936  2.92118  2.45903  5.27263  3.97469    465 e - - -
          2.68618  4.42225  2.77519  2.73123  3.46354  2.40513  3.72494  3.29354  2.67741  2.69355  4.24690  2.90347  2.73739  3.18146  2.89801  2.37887  2.77519  2.98518  4.58477  3.61503
          0.01910  4.36335  5.08570  0.61958  0.77255  0.48576  0.95510
    402   3.27218  4.54137  5.16152  4.62866  3.62475  4.68562  5.17687  1.36072  4.51696  2.12528  2.44145  4.78950  4.93826  4.69673  4.64116  4.05549  3.51755  1.12861  5.57548  4.42055    466 v - - -
          2.68618  4.42225  2.77519  2.73123  3.46354  2.40513  3.72494  3.29354  2.67741  2.69355  4.24690  2.90347  2.73739  3.18146  2.89801  2.37887  2.77519  2.98518  4.58477  3.61503
          0.13340  4.36335  2.18793  0.61958  0.77255  0.48576  0.95510
    403   2.45666  4.39654  3.47005  3.12946  4.26468  2.27483  4.21987  3.62651  3.15920  3.34185  4.20534  3.38964  1.32018  3.47869  3.49964  2.62435  2.89596  2.65226  5.62383  4.38397    467 p - - -
          2.68618  4.42225  2.77519  2.73123  3.46354  2.40513  3.72494  3.29354  2.67741  2.69355  4.24690  2.90347  2.73739  3.18146  2.89801  2.37887  2.77519  2.98518  4.58477  3.61503
          0.02139  4.25134  4.97369  0.61958  0.77255  0.63253  0.75768
    404   2.16912  4.85484  3.50871  2.97776  4.43849  3.53497  3.90151  3.78665  2.35449  3.38045  4.27481  3.34597  4.05031  3.07583  1.11767  2.93900  3.15274  3.44221  5.55650  4.34288    468 r - - -
          2.68618  4.42225  2.77519  2.73123  3.46354  2.40513  3.72494  3.29354  2.67741  2.69355  4.24690  2.90347  2.73739  3.18146  2.89801  2.37887  2.77519  2.98518  4.58477  3.61503
          0.10142  4.25134  2.49862  0.61958  0.77255  0.63253  0.75768
    405   2.90253  5.38455  1.41867  2.22881  4.76614  3.29992  3.82031  4.28315  2.78465  3.78966  4.61134  2.05642  3.89568  2.97710  3.35131  2.25550  3.19663  3.84234  5.94732  4.47163    469 d - - -
          2.68618  4.42225  2.77519  2.73123  3.46354  2.40513  3.72494  3.29354  2.67741  2.69355  4.24690  2.90347  2.73739  3.18146  2.89801  2.37887  2.77519  2.98518  4.58477  3.61503
          0.02315  4.17308  4.89543  0.61958  0.77255  0.56450  0.84082
    406   2.76491  5.04775  2.88601  1.57647  4.34379  3.47248  3.70505  3.71639  2.02625  3.31403  4.13615  2.98370  3.90606  2.84368  2.83042  2.76291  2.99976  2.64751  5.52414  4.17891    470 e - - -
          2.68618  4.42225  2.77519  2.73123  3.46354  2.40513  3.72494  3.29354  2.67741  2.69355  4.24690  2.90347  2.73739  3.18146  2.89801  2.37887  2.77519  2.98518  4.58477  3.61503
          0.02139  4.25134  4.97369  0.61958  0.77255  0.40384  1.10187
    407   2.66805  5.01959  2.51478  2.28277  4.30729  3.46428  3.65483  2.91112  2.11690  3.29785  4.07674  2.95973  3.85619  2.45043  2.56994  2.66288  2.89833  3.37931  3.48189  4.11731    471 k - - -
          2.68618  4.42225  2.77519  2.73123  3.46354  2.40513  3.72494  3.29354  2.67741  2.69355  4.24690  2.90347  2.73739  3.18146  2.89801  2.37887  2.77519  2.98518  4.58477  3.61503
          0.01910  4.36335  5.08570  0.61958  0.77255  0.48576  0.95510
    408   2.91766  5.36376  1.74818  2.34863  4.74838  3.40361  3.86495  4.23533  2.77241  3.75694  4.56366  1.59234  3.96213  3.01158  3.31108  2.86074  2.33935  3.80801  5.92264  4.47683    472 n - - -
          2.68618  4.42225  2.77519  2.73123  3.46354  2.40513  3.72494  3.29354  2.67741  2.69355  4.24690  2.90347  2.73739  3.18146  2.89801  2.37887  2.77519  2.98518  4.58477  3.61503
          0.01910  4.36335  5.08570  0.61958  0.77255  0.48576  0.95510
    409   2.75169  4.91061  2.92900  2.64505  4.52369  1.39077  3.96003  3.98081  2.76947  3.55678  4.37937  3.12448  2.69600  2.30185  3.18815  2.79934  3.08652  3.55694  5.74183  4.41183    473 g - - -
          2.68618  4.42225  2.77519  2.73123  3.46354  2.40513  3.72494  3.29354  2.67741  2.69355  4.24690  2.90347  2.73739  3.18146  2.89801  2.37887  2.77519  2.98518  4.58477  3.61503
          0.01910  4.36335  5.08570  0.61958  0.77255  0.48576  0.95510
    410   2.65365  4.39779  3.50291  2.93535  3.54051  2.87151  3.87293  2.90675  2.87143  2.34611  3.50554  3.34698  4.00291  3.19184  2.59898  2.34132  2.88736  2.27820  3.13434  3.73768    474 v - - -
          2.68618  4.42225  2.77519  2.73123  3.46354  2.40513  3.72494  3.29354  2.67741  2.69355  4.24690  2.90347  2.73739  3.18146  2.89801  2.37887  2.77519  2.98518  4.58477  3.61503
          0.01910  4.36335  5.08570  0.61958  0.77255  0.48576  0.95510
    411   3.69538  4.97262  5.07285  4.66518  0.91252  4.70617  4.28575  2.74258  4.49311  1.53852  3.36547  4.62014  4.95792  4.50365  4.52591  4.10699  3.92755  2.85948  4.43404  2.82479    475 f - - -
          2.68632  4.42069  2.77534  2.73137  3.46368  2.40527  3.72509  3.29313  2.67755  2.69309  4.24704  2.90361  2.73691  3.18160  2.89815  2.37879  2.77534  2.98532  4.58491  3.61517
          0.11930  2.24170  5.08570  1.56451  0.23470  0.48576  0.95510
    412   2.42855  4.39148  3.64168  3.30103  4.52450  2.18195  4.38229  3.95095  3.34605  3.61802  4.42831  3.48347  3.89492  3.63292  3.68428  1.72336  1.27372  3.39497  5.85028  4.63165    483 t - - -
          2.68618  4.42225  2.77519  2.73123  3.46354  2.40513  3.72494  3.29354  2.67741  2.69355  4.24690  2.90347  2.73739  3.18146  2.89801  2.37887  2.77519  2.98518  4.58477  3.61503
          0.01910  4.36335  5.08570  0.61958  0.77255  0.48576  0.95510
    413   2.81296  5.11508  3.11092  2.57221  4.51227  2.11169  3.71810  3.93664  1.79718  3.44519  4.24140  3.07347  3.95623  2.84171  2.11972  2.43698  3.04436  3.55575  5.58265  4.26662    484 k - - -
          2.68618  4.42225  2.77519  2.73123  3.46354  2.40513  3.72494  3.29354  2.67741  2.69355  4.24690  2.90347  2.73739  3.18146  2.89801  2.37887  2.77519  2.98518  4.58477  3.61503
          0.01910  4.36335  5.08570  0.61958  0.77255  0.48576  0.95510
    414   2.46142  5.53058  2.09139  1.27064  4.84136  3.41223  3.84107  4.34822  2.75343  3.83090  4.62910  2.29448  3.96435  2.98026  3.31168  2.88010  3.23420  3.91117  5.98129  4.50666    485 e - - -
          2.68618  4.42225  2.77519  2.73123  3.46354  2.40513  3.72494  3.29354  2.67741  2.69355  4.24690  2.90347  2.73739  3.18146  2.89801  2.37887  2.77519  2.98518  4.58477  3.61503
          0.01910  4.36335  5.08570  0.61958  0.77255  0.48576  0.95510
    415   2.77663  5.18654  2.77639  1.90137  4.53619  2.63758  3.73325  3.99960  2.14929  3.51555  4.29572  2.94303  3.90326  2.85746  2.98020  1.82151  3.02474  3.59428  5.67717  4.28387    486 s - - -
          2.68618  4.42225  2.77519  2.73123  3.46354  2.40513  3.72494  3.29354  2.67741  2.69355  4.24690  2.90347  2.73739  3.18146  2.89801  2.37887  2.77519  2.98518  4.58477  3.61503
          0.01910  4.36335  5.08570  0.61958  0.77255  0.48576  0.95510
    416   3.21187  4.50924  5.07828  4.51507  2.44134  4.53222  4.90518  1.76432  4.37903  1.59558  3.23594  4.63935  4.78767  4.49538  4.45222  3.87865  3.44573  1.25295  5.27379  4.12142    487 v - - -
          2.68618  4.42225  2.77519  2.73123  3.46354  2.40513  3.72494  3.29354  2.67741  2.69355  4.24690  2.90347  2.73739  3.18146  2.89801  2.37887  2.77519  2.98518  4.58477  3.61503
          0.01910  4.36335  5.08570  0.61958  0.77255  0.48576  0.95510
    417   1.47870  4.91951  2.86096  1.77387  4.45156  3.38299  3.90045  3.86962  2.75206  3.47456  4.29294  3.06172  3.93310  3.06400  3.21430  2.36165  3.04192  3.47080  5.69402  4.34345    488 a - - -
          2.68618  4.42225  2.77519  2.73123  3.46354  2.40513  3.72494  3.29354  2.67741  2.69355  4.24690  2.90347  2.73739  3.18146  2.89801  2.37887  2.77519  2.98518  4.58477  3.61503
          0.01910  4.36335  5.08570  0.61958  0.77255  0.48576  0.95510
    418   2.74982  5.15068  3.03038  2.22697  4.48807  3.51037  3.25703  3.93452  1.82530  2.77244  4.20229  2.43885  3.89857  2.76814  2.28674  2.72636  2.97125  3.53949  5.56625  4.21114    489 k - - -
          2.68618  4.42225  2.77519  2.73123  3.46354  2.40513  3.72494  3.29354  2.67741  2.69355  4.24690  2.90347  2.73739  3.18146  2.89801  2.37887  2.77519  2.98518  4.58477  3.61503
          0.01910  4.36335  5.08570  0.61958  0.77255  0.48576  0.95510
    419   1.70706  2.70949  4.00534  3.49129  3.67850  3.41879  4.23432  2.95457  3.40897  2.75423  3.65803  3.64868  4.00777  3.66268  3.66113  2.46782  2.04606  2.10555  5.15370  3.95830    490 a - - -
          2.68618  4.42225  2.77519  2.73123  3.46354  2.40513  3.72494  3.29354  2.67741  2.69355  4.24690  2.90347  2.73739  3.18146  2.89801  2.37887  2.77519  2.98518  4.58477  3.61503
          0.01910  4.36335  5.08570  0.61958  0.77255  0.48576  0.95510
    420   3.41913  4.66993  5.30314  4.76728  3.49447  4.84400  5.29938  1.31106  4.65237  1.19606  3.26644  4.95093  5.03466  4.76435  4.74608  4.22461  3.65667  1.63397  5.57240  4.47677    491 l - - -
          2.68618  4.42225  2.77519  2.73123  3.46354  2.40513  3.72494  3.29354  2.67741  2.69355  4.24690  2.90347  2.73739  3.18146  2.89801  2.37887  2.77519  2.98518  4.58477  3.61503
          0.01910  4.36335  5.08570  0.61958  0.77255  0.48576  0.95510
    421   3.11586  5.37154  3.43632  2.80410  4.83636  3.75997  3.73503  4.20279  1.28595  3.61668  4.44710  2.41966  4.12771  2.85451  1.65563  3.08625  3.29120  3.84362  5.65145  4.43846    492 k - - -
          2.68618  4.42225  2.77519  2.73123  3.46354  2.40513  3.72494  3.29354  2.67741  2.69355  4.24690  2.90347  2.73739  3.18146  2.89801  2.37887  2.77519  2.98518  4.58477  3.61503
          0.01910  4.36335  5.08570  0.61958  0.77255  0.48576  0.95510
    422   2.66430  4.85168  2.55492  2.50995  3.18162  3.49345  2.56157  3.50208  2.49958  2.65785  3.92449  3.02743  3.88490  2.85266  2.53617  2.44499  2.89571  3.18283  5.34221  4.00233    493 s - - -
          2.68618  4.42225  2.77519  2.73123  3.46354  2.40513  3.72494  3.29354  2.67741  2.69355  4.24690  2.90347  2.73739  3.18146  2.89801  2.37887  2.77519  2.98518  4.58477  3.61503
          0.01910  4.36335  5.08570  0.61958  0.77255  0.48576  0.95510
    423   2.25191  4.42267  4.73398  4.18934  3.62670  4.34110  4.80226  1.82621  4.08164  1.94314  3.48903  4.38939  4.67388  4.31698  4.26585  3.68095  3.31699  1.11105  5.39358  4.20081    494 v - - -
          2.68618  4.42225  2.77519  2.73123  3.46354  2.40513  3.72494  3.29354  2.67741  2.69355  4.24690  2.90347  2.73739  3.18146  2.89801  2.37887  2.77519  2.98518  4.58477  3.61503
          0.01910  4.36335  5.08570  0.61958  0.77255  0.48576  0.95510
    424   3.11378  4.44425  4.93588  4.35520  2.42820  4.36865  4.71316  1.91701  4.20519  1.87195  1.95939  4.47140  4.64564  4.31831  4.27157  3.69953  3.34392  1.49511  5.11762  3.98130    495 v - - -
          2.68618  4.42225  2.77519  2.73123  3.46354  2.40513  3.72494  3.29354  2.67741  2.69355  4.24690  2.90347  2.73739  3.18146  2.89801  2.37887  2.77519  2.98518  4.58477  3.61503
          0.01910  4.36335  5.08570  0.61958  0.77255  0.48576  0.95510
    425   2.71183  4.54233  2.81368  2.83526  3.71800  3.61136  3.90148  2.92516  2.85249  2.28152  3.66102  2.65563  4.02286  3.16985  3.24700  2.88328  2.95488  1.66057  5.14984  3.88135    496 v - - -
          2.68618  4.42225  2.77519  2.73123  3.46354  2.40513  3.72494  3.29354  2.67741  2.69355  4.24690  2.90347  2.73739  3.18146  2.89801  2.37887  2.77519  2.98518  4.58477  3.61503
          0.01910  4.36335  5.08570  0.61958  0.77255  0.48576  0.95510
    426   2.76314  5.28602  2.08496  2.10887  4.61863  3.43098  2.78670  4.10861  2.22432  3.58396  4.33770  2.43312  3.87603  2.31822  2.96906  2.71032  3.00211  3.67152  5.71638  4.29135    497 d - - -
          2.68620  4.42227  2.77521  2.73125  3.46356  2.40515  3.72496  3.29356  2.67743  2.69357  4.24692  2.90349  2.73741  3.18148  2.89803  2.37867  2.77521  2.98520  4.58479  3.61505
          0.11930  2.24170  5.08570  0.31514  1.30817  0.48576  0.95510
    427   3.21170  5.85822  1.57700  0.98745  5.14267  3.41387  3.99504  4.69423  3.05882  4.16375  5.02793  2.86834  4.05896  3.16507  3.69022  3.07014  3.50843  4.24193  6.29957  4.75967    499 e - - -
          2.68618  4.42225  2.77519  2.73123  3.46354  2.40513  3.72494  3.29354  2.67741  2.69355  4.24690  2.90347  2.73739  3.18146  2.89801  2.37887  2.77519  2.98518  4.58477  3.61503
          0.01910  4.36335  5.08570  0.61958  0.77255  0.48576  0.95510
    428   3.06326  5.64891  1.89728  1.08290  4.95969  3.40594  3.90736  4.48085  2.88296  3.96192  4.78478  2.86574  4.00240  3.06031  3.46845  2.43203  3.34386  4.03763  6.11396  4.61147    500 e - - -
          2.68621  4.42228  2.77499  2.73126  3.46357  2.40516  3.72497  3.29317  2.67744  2.69358  4.24692  2.90349  2.73742  3.18149  2.89803  2.37890  2.77522  2.98521  4.58480  3.61506
          0.09017  2.52524  5.08570  0.65605  0.73168  0.48576  0.95510
    429   1.77677  4.34667  3.72918  3.49384  4.70975  1.07277  4.57230  4.15557  3.60912  3.82910  4.62462  3.56753  3.89226  3.85148  3.90534  1.94500  2.91436  3.49580  6.03509  4.84980    503 g - - -
          2.68618  4.42225  2.77519  2.73123  3.46354  2.40513  3.72494  3.29354  2.67741  2.69355  4.24690  2.90347  2.73739  3.18146  2.89801  2.37887  2.77519  2.98518  4.58477  3.61503
          0.01910  4.36335  5.08570  0.61958  0.77255  0.48576  0.95510
    430   3.00746  5.24817  3.35870  2.75284  4.69228  3.68888  3.73994  4.07727  1.21223  3.53845  4.36241  3.21082  4.07667  2.86445  2.02572  2.25013  3.20800  3.71611  5.61608  4.37452    504 k - - -
          2.68618  4.42225  2.77519  2.73123  3.46354  2.40513  3.72494  3.29354  2.67741  2.69355  4.24690  2.90347  2.73739  3.18146  2.89801  2.37887  2.77519  2.98518  4.58477  3.61503
          0.01910  4.36335  5.08570  0.61958  0.77255  0.48576  0.95510
    431   2.35712  4.74876  3.14132  2.58221  3.96266  3.51813  3.72895  2.88389  2.24515  2.65915  3.83171  3.08382  3.90734  2.29136  2.98742  2.56826  2.44441  3.06422  5.27369  3.96684    505 k - - -
          2.68618  4.42225  2.77519  2.73123  3.46354  2.40513  3.72494  3.29354  2.67741  2.69355  4.24690  2.90347  2.73739  3.18146  2.89801  2.37887  2.77519  2.98518  4.58477  3.61503
          0.01910  4.36335  5.08570  0.61958  0.77255  0.48576  0.95510
    432   2.87018  4.25855  4.58172  3.99218  3.20829  4.04749  4.35852  1.72001  3.83677  1.92398  2.45578  4.11506  4.37864  3.99903  3.93537  3.35700  3.10116  2.01052  4.87334  2.21465    506 i - - -
          2.68618  4.42225  2.77519  2.73123  3.46354  2.40513  3.72494  3.29354  2.67741  2.69355  4.24690  2.90347  2.73739  3.18146  2.89801  2.37887  2.77519  2.98518  4.58477  3.61503
          0.01910  4.36335  5.08570  0.61958  0.77255  0.48576  0.95510
    433   3.42148  5.46432  3.94778  3.15824  5.01468  3.96760  3.80709  4.31795  1.60638  3.69411  4.58715  3.50134  4.31231  2.93939  0.88107  3.40744  3.55004  4.01095  5.66973  4.57281    507 r - - -
          2.68618  4.42225  2.77519  2.73123  3.46354  2.40513  3.72494  3.29354  2.67741  2.69355  4.24690  2.90347  2.73739  3.18146  2.89801  2.37887  2.77519  2.98518  4.58477  3.61503
          0.01910  4.36335  5.08570  0.61958  0.77255  0.48576  0.95510
    434   2.31016  5.17627  2.49674  2.10317  4.51042  3.43722  3.64257  3.98985  2.14980  3.47593  4.22276  2.58353  3.84365  2.74534  2.42693  2.40323  2.92008  3.56162  5.61350  4.20654    508 e - - -
          2.68618  4.42225  2.77519  2.73123  3.46354  2.40513  3.72494  3.29354  2.67741  2.69355  4.24690  2.90347  2.73739  3.18146  2.89801  2.37887  2.77519  2.98518  4.58477  3.61503
          0.01910  4.36335  5.08570  0.61958  0.77255  0.48576  0.95510
    435   2.92050  5.24262  2.74880  2.49530  4.68422  2.91016  3.85623  4.14771  2.04792  3.66468  4.48300  1.29319  3.99846  3.00346  2.98392  2.89552  3.19447  3.74157  5.80250  4.43813    509 n - - -
          2.68608  4.42226  2.77521  2.73125  3.46355  2.40506  3.72496  3.29355  2.67742  2.69356  4.24691  2.90348  2.73741  3.18148  2.89802  2.37888  2.77521  2.98520  4.58478  3.61504
          0.09422  2.48017  5.08570  0.35716  1.20285  0.48576  0.95510
    436   0.93847  4.63004  3.34448  3.02856  4.08858  3.39634  2.88924  3.65473  3.01083  3.31991  4.21277  3.38538  4.01836  3.40359  3.34413  2.82669  3.06990  3.29002  5.47767  4.13887    511 a - - -
          2.68618  4.42225  2.77519  2.73123  3.46354  2.40513  3.72494  3.29354  2.67741  2.69355  4.24690  2.90347  2.73739  3.18146  2.89801  2.37887  2.77519  2.98518  4.58477  3.61503
          0.01910  4.36335  5.08570  0.61958  0.77255  0.48576  0.95510
    437   2.76154  5.09898  2.95997  2.49100  4.49183  3.47767  3.72668  3.93467  1.56485  3.45630  4.24286  2.23294  3.91698  2.85101  2.82719  2.40705  2.59927  3.53939  5.61144  4.25832    512 k - - -
          2.68618  4.42225  2.77519  2.73123  3.46354  2.40513  3.72494  3.29354  2.67741  2.69355  4.24690  2.90347  2.73739  3.18146  2.89801  2.37887  2.77519  2.98518  4.58477  3.61503
          0.01910  4.36335  5.08570  0.61958  0.77255  0.48576  0.95510
    438   2.79459  5.17210  2.97539  1.70126  4.49752  3.51844  3.68907  3.93690  1.84916  2.73540  4.22981  3.00205  3.92492  2.46140  2.73941  2.77082  3.01789  3.55458  5.58929  4.23843    513 e - - -
          2.68618  4.42225  2.77519  2.73123  3.46354  2.40513  3.72494  3.29354  2.67741  2.69355  4.24690  2.90347  2.73739  3.18146  2.89801  2.37887  2.77519  2.98518  4.58477  3.61503
          0.01910  4.36335  5.08570  0.61958  0.77255  0.48576  0.95510
    439   2.78803  4.25381  4.23354  3.64736  3.21521  3.89879  4.18780  2.11468  3.51596  1.65461  2.08099  3.86962  4.24516  2.97319  3.69536  3.18858  3.01731  2.42848  4.83198  3.11795    514 l - - -
          2.68618  4.42225  2.77519  2.73123  3.46354  2.40513  3.72494  3.29354  2.67741  2.69355  4.24690  2.90347  2.73739  3.18146  2.89801  2.37887  2.77519  2.98518  4.58477  3.61503
          0.01910  4.36335  5.08570  0.61958  0.77255  0.48576  0.95510
    440   2.22785  4.87694  3.05559  2.58419  4.41329  2.49170  3.81032  3.85194  1.74452  3.41549  4.20697  3.07156  3.89338  2.95062  2.99909  2.03724  2.95170  3.43867  5.60453  4.26649    515 k - - -
          2.68618  4.42225  2.77519  2.73123  3.46354  2.40513  3.72494  3.29354  2.67741  2.69355  4.24690  2.90347  2.73739  3.18146  2.89801  2.37887  2.77519  2.98518  4.58477  3.61503
          0.01910  4.36335  5.08570  0.61958  0.77255  0.48576  0.95510
    441   3.04730  5.42974  2.83776  1.51949  4.81116  3.57512  3.80921  4.24345  1.35834  3.70919  4.53416  3.05941  4.05251  2.94222  2.73305  2.99086  3.27422  3.85653  5.79977  4.47166    516 k - - -
          2.68618  4.42225  2.77519  2.73123  3.46354  2.40513  3.72494  3.29354  2.67741  2.69355  4.24690  2.90347  2.73739  3.18146  2.89801  2.37887  2.77519  2.98518  4.58477  3.61503
          0.01910  4.36335  5.08570  0.61958  0.77255  0.48576  0.95510
    442   2.69057  4.49354  3.44786  2.88160  3.66008  3.63192  3.87449  2.30203  1.95478  2.48186  3.59475  3.31758  4.01618  3.14923  3.16375  2.38286  2.92409  2.36181  5.08505  3.83508    517 k - - -
          2.68618  4.42225  2.77519  2.73123  3.46354  2.40513  3.72494  3.29354  2.67741  2.69355  4.24690  2.90347  2.73739  3.18146  2.89801  2.37887  2.77519  2.98518  4.58477  3.61503
          0.01910  4.36335  5.08570  0.61958  0.77255  0.48576  0.95510
    443   3.16154  4.51491  4.84664  4.27406  1.89929  4.32386  4.43538  2.52879  4.11502  1.19696  2.30353  4.36657  4.59603  4.19449  4.17284  3.64436  3.38264  2.57939  4.76642  2.91243    518 l - - -
          2.68618  4.42225  2.77519  2.73123  3.46354  2.40513  3.72494  3.29354  2.67741  2.69355  4.24690  2.90347  2.73739  3.18146  2.89801  2.37887  2.77519  2.98518  4.58477  3.61503
          0.01910  4.36335  5.08570  0.61958  0.77255  0.48576  0.95510
    444   2.71267  5.08083  3.01610  2.45457  4.39797  2.94997  3.66011  3.84138  1.84699  3.36432  4.14127  2.98266  3.88160  2.35499  2.42099  2.37568  2.93927  2.95311  5.52672  4.16813    519 k - - -
          2.68618  4.42225  2.77519  2.73123  3.46354  2.40513  3.72494  3.29354  2.67741  2.69355  4.24690  2.90347  2.73739  3.18146  2.89801  2.37887  2.77519  2.98518  4.58477  3.61503
          0.01910  4.36335  5.08570  0.61958  0.77255  0.48576  0.95510
    445   2.78956  5.29720  2.46267  1.99872  4.62195  3.43043  3.71497  4.10835  2.11120  3.59421  4.35791  2.32714  3.89066  2.83048  3.01630  1.88134  3.03199  3.67982  5.73641  4.31091    520 s - - -
          2.68618  4.42225  2.77519  2.73123  3.46354  2.40513  3.72494  3.29354  2.67741  2.69355  4.24690  2.90347  2.73739  3.18146  2.89801  2.37887  2.77519  2.98518  4.58477  3.61503
          0.01910  4.36335  5.08570  0.61958  0.77255  0.48576  0.95510
    446   2.22238  4.97260  2.49482  2.44822  4.25072  3.46697  3.68095  2.85330  1.92327  3.25208  4.04583  2.97875  3.19677  2.81242  2.92662  2.68187  2.90912  3.32297  5.46316  4.10444    521 k - - -
          2.68657  4.42264  2.77521  2.73100  3.46319  2.40455  3.72449  3.29393  2.67747  2.69360  4.24568  2.90386  2.73779  3.18186  2.89840  2.37807  2.77526  2.98558  4.58516  3.61542
          0.39633  1.13622  5.08570  1.63490  0.21688  0.48576  0.95510
    447   2.29370  5.17597  2.45507  1.86400  4.50494  2.92860  3.66892  3.98020  2.43560  3.47953  4.23656  2.91103  3.85753  2.77852  2.58099  2.31804  2.94650  3.56117  5.62932  4.22280    530 e - - -
          2.68618  4.42225  2.77519  2.73123  3.46354  2.40513  3.72494  3.29354  2.67741  2.69355  4.24690  2.90347  2.73739  3.18146  2.89801  2.37887  2.77519  2.98518  4.58477  3.61503
          0.01910  4.36335  5.08570  0.61958  0.77255  0.48576  0.95510
    448   2.76916  4.97738  2.93442  2.11690  4.21502  3.50766  3.74694  3.63372  2.51853  1.89713  4.05538  2.45190  3.93560  2.42820  2.94959  2.78850  3.00312  3.31310  5.46151  4.12523    531 l - - -
          2.68618  4.42225  2.77519  2.73123  3.46354  2.40513  3.72494  3.29354  2.67741  2.69355  4.24690  2.90347  2.73739  3.18146  2.89801  2.37887  2.77519  2.98518  4.58477  3.61503
          0.01910  4.36335  5.08570  0.61958  0.77255  0.48576  0.95510
    449   2.70722  4.31885  3.76815  3.19726  2.60781  3.72823  2.54403  2.75615  3.10987  1.92468  2.62938  3.54053  4.09831  2.84391  3.40365  2.99095  2.93784  2.57100  4.82176  3.54925    532 l - - -
          2.68618  4.42225  2.77519  2.73123  3.46354  2.40513  3.72494  3.29354  2.67741  2.69355  4.24690  2.90347  2.73739  3.18146  2.89801  2.37887  2.77519  2.98518  4.58477  3.61503
          0.01910  4.36335  5.08570  0.61958  0.77255  0.48576  0.95510
    450   2.67533  5.05561  2.42770  2.40399  4.35397  3.45146  3.66033  3.00351  2.12370  3.34302  4.11657  2.42258  3.85430  2.77818  2.90613  2.28685  2.60064  3.42175  5.52381  4.14410    533 k - - -
          2.68618  4.42225  2.77519  2.73123  3.46354  2.40513  3.72494  3.29354  2.67741  2.69355  4.24690  2.90347  2.73739  3.18146  2.89801  2.37887  2.77519  2.98518  4.58477  3.61503
          0.01910  4.36335  5.08570  0.61958  0.77255  0.48576  0.95510
    451   2.66886  4.67599  3.20631  2.64645  3.87043  2.55234  3.34146  2.64953  2.59497  2.91330  3.76389  3.13353  3.92963  2.31215  2.75472  2.76359  2.89970  2.48018  5.21092  3.92164    534 q - - -
          2.68618  4.42225  2.77519  2.73123  3.46354  2.40513  3.72494  3.29354  2.67741  2.69355  4.24690  2.90347  2.73739  3.18146  2.89801  2.37887  2.77519  2.98518  4.58477  3.61503
          0.01910  4.36335  5.08570  0.61958  0.77255  0.48576  0.95510
    452   3.03761  4.45700  4.48146  3.93687  2.95717  4.13743  4.21084  2.53632  3.77890  1.53761  3.32011  4.09273  4.47090  3.97698  3.93067  3.45152  3.27118  1.97612  4.64739  1.66357    535 l - - -
          2.68618  4.42225  2.77519  2.73123  3.46354  2.40513  3.72494  3.29354  2.67741  2.69355  4.24690  2.90347  2.73739  3.18146  2.89801  2.37887  2.77519  2.98518  4.58477  3.61503
          0.01910  4.36335  5.08570  0.61958  0.77255  0.48576  0.95510
    453   2.52580  4.38771  4.85644  4.29377  3.49830  4.35684  4.76426  1.53398  4.16568  1.82038  2.87226  4.43728  4.66161  4.34989  4.28642  3.69116  3.29961  1.37360  5.26428  4.09423    536 v - - -
          2.68618  4.42225  2.77519  2.73123  3.46354  2.40513  3.72494  3.29354  2.67741  2.69355  4.24690  2.90347  2.73739  3.18146  2.89801  2.37887  2.77519  2.98518  4.58477  3.61503
          0.01910  4.36335  5.08570  0.61958  0.77255  0.48576  0.95510
    454   3.23371  5.90213  1.17999  1.27423  5.18052  3.41021  4.00602  4.73920  3.09098  4.20345  5.07459  2.86169  4.06440  3.17865  3.73748  3.08449  3.53399  4.28210  6.34045  4.78645    537 d - - -
          2.68618  4.42225  2.77519  2.73123  3.46354  2.40513  3.72494  3.29354  2.67741  2.69355  4.24690  2.90347  2.73739  3.18146  2.89801  2.37887  2.77519  2.98518  4.58477  3.61503
          0.01910  4.36335  5.08570  0.61958  0.77255  0.48576  0.95510
    455   2.76912  5.28178  2.53134  1.69641  4.60933  2.64613  3.02837  4.09649  2.10426  3.57805  4.33596  2.64598  3.88020  2.80940  2.98279  2.71743  3.00888  3.66478  5.71581  4.29230    538 e - - -
          2.68618  4.42225  2.77519  2.73123  3.46354  2.40513  3.72494  3.29354  2.67741  2.69355  4.24690  2.90347  2.73739  3.18146  2.89801  2.37887  2.77519  2.98518  4.58477  3.61503
          0.01910  4.36335  5.08570  0.61958  0.77255  0.48576  0.95510
    456   3.01074  3.36454  4.85681  4.26919  2.08940  4.23160  4.55096  1.64479  4.10123  1.45919  3.14413  4.34725  4.53393  4.21581  4.15135  3.55669  3.24146  2.21474  4.97032  3.79553    539 l - - -
          2.68618  4.42225  2.77519  2.73123  3.46354  2.40513  3.72494  3.29354  2.67741  2.69355  4.24690  2.90347  2.73739  3.18146  2.89801  2.37887  2.77519  2.98518  4.58477  3.61503
          0.01910  4.36335  5.08570  0.61958  0.77255  0.48576  0.95510
    457   2.91231  4.34262  4.37130  3.79940  3.47263  4.08944  4.42715  1.63716  2.72457  1.91903  3.39061  4.04596  4.43008  3.92557  3.85922  3.39344  3.14930  1.49187  5.11878  3.92607    540 v - - -
          2.68618  4.42225  2.77519  2.73123  3.46354  2.40513  3.72494  3.29354  2.67741  2.69355  4.24690  2.90347  2.73739  3.18146  2.89801  2.37887  2.77519  2.98518  4.58477  3.61503
          0.01910  4.36335  5.08570  0.61958  0.77255  0.48576  0.95510
    458   2.40724  5.17153  2.95101  1.91584  4.51235  3.47545  3.64975  3.97527  2.04395  3.46222  4.22073  2.95027  3.87265  2.32994  2.39599  2.50473  2.94880  3.56148  5.59501  4.21493    541 e - - -
          2.68618  4.42225  2.77519  2.73123  3.46354  2.40513  3.72494  3.29354  2.67741  2.69355  4.24690  2.90347  2.73739  3.18146  2.89801  2.37887  2.77519  2.98518  4.58477  3.61503
          0.01910  4.36335  5.08570  0.61958  0.77255  0.48576  0.95510
    459   2.32594  3.03220  4.19078  3.60057  2.73776  3.07670  4.06977  2.54124  3.46711  1.98305  3.21647  3.77322  4.12718  3.67343  3.61999  2.77213  2.87583  2.03008  4.71445  3.08866    542 l - - -
          2.68618  4.42225  2.77519  2.73123  3.46354  2.40513  3.72494  3.29354  2.67741  2.69355  4.24690  2.90347  2.73739  3.18146  2.89801  2.37887  2.77519  2.98518  4.58477  3.61503
          0.13340  4.36335  2.18793  0.61958  0.77255  0.48576  0.95510
    460   2.29577  4.40974  4.41964  3.89121  3.44120  4.06066  4.55966  2.19623  3.76780  1.26070  3.31310  4.11785  4.45487  4.01766  3.97378  3.40678  3.21596  1.71547  5.21633  4.04469    543 l - - -
          2.68618  4.42225  2.77519  2.73123  3.46354  2.40513  3.72494  3.29354  2.67741  2.69355  4.24690  2.90347  2.73739  3.18146  2.89801  2.37887  2.77519  2.98518  4.58477  3.61503
          0.02139  4.25134  4.97369  0.61958  0.77255  0.63253  0.75768
    461   2.64691  4.88477  3.00657  2.10412  3.09998  3.45958  3.27116  3.55991  2.10808  3.14552  3.95272  2.97912  3.85162  2.50754  2.88154  2.66858  2.87697  3.22584  5.35420  3.12735    544 e - - -
          2.68618  4.42225  2.77519  2.73123  3.46354  2.40513  3.72494  3.29354  2.67741  2.69355  4.24690  2.90347  2.73739  3.18146  2.89801  2.37887  2.77519  2.98518  4.58477  3.61503
          0.02139  4.25134  4.97369  0.61958  0.77255  0.63253  0.75768
    462   2.81418  5.20210  2.84532  2.15652  4.55126  3.47447  3.68530  3.99170  1.46752  3.48878  4.28136  2.51347  3.91165  2.80833  2.72877  2.78048  2.69903  3.60176  5.62335  4.26982    545 k - - -
          2.68618  4.42225  2.77519  2.73123  3.46354  2.40513  3.72494  3.29354  2.67741  2.69355  4.24690  2.90347  2.73739  3.18146  2.89801  2.37887  2.77519  2.98518  4.58477  3.61503
          0.02139  4.25134  4.97369  0.61958  0.77255  0.63253  0.75768
    463   2.64978  4.96808  2.94986  2.41206  4.24062  3.44047  2.90955  3.68549  2.12275  3.24320  4.03188  2.61380  3.14108  2.76674  2.85896  2.26507  2.88095  3.32451  5.43779  3.19527    546 k - - -
          2.68618  4.42225  2.77519  2.73123  3.46354  2.40513  3.72494  3.29354  2.67741  2.69355  4.24690  2.90347  2.73739  3.18146  2.89801  2.37887  2.77519  2.98518  4.58477  3.61503
          0.02139  4.25134  4.97369  0.61958  0.77255  0.63253  0.75768
    464   2.44994  4.73452  3.10264  2.18776  3.95314  3.48676  3.69599  2.85889  2.50501  2.63636  3.81746  3.04905  3.87716  2.87048  2.39533  2.34262  2.86978  3.04961  5.25686  3.94850    547 e - - -
          2.68618  4.42225  2.77519  2.73123  3.46354  2.40513  3.72494  3.29354  2.67741  2.69355  4.24690  2.90347  2.73739  3.18146  2.89801  2.37887  2.77519  2.98518  4.58477  3.61503
          0.15413  4.25134  2.05106  0.61958  0.77255  0.63253  0.75768
    465   2.28498  4.35990  3.39179  2.84053  3.53686  3.51505  2.88880  2.35437  2.78881  2.60405  3.49560  3.25659  3.92248  3.11252  3.15477  2.33868  2.82431  2.45680  4.96774  3.71995    548 a - - -
          2.68634  4.42241  2.77535  2.73123  3.46369  2.40511  3.72467  3.29346  2.67756  2.69370  4.24705  2.90331  2.73729  3.18162  2.89816  2.37856  2.77535  2.98463  4.58493  3.61519
          0.39557  1.11871        *  1.00475  0.45592  0.00000        *
//
